# Supplementary material for: Deliberative democracy and cancer screening consent: a randomised control trial of the effect of a community jury on men's knowledge about and intentions to participate in PSA screening
Source: PubMed Central journal article supplement — BMJ Open. 2014 Dec 24;4(12):e005691. doi: 10.1136/bmjopen-2014-005691 (PMC4281538; doi:10.1136/bmjopen-2014-005691), 2014-12-24
Supplement: bmjopen-2014-005691.draft_revisions.pdf [file bmjopen-2014-005691.draft_revisions.pdf]

# BMJ Open

**Deliberative democracy and cancer screening consent: a randomised control trial of the effect of a community jury on men's knowledge about and intentions to participate in PSA screening.**

|                                 |                                                                                                                                                                                                                                                                                                                                                                                                                                                                                                                                                                     |
|---------------------------------|---------------------------------------------------------------------------------------------------------------------------------------------------------------------------------------------------------------------------------------------------------------------------------------------------------------------------------------------------------------------------------------------------------------------------------------------------------------------------------------------------------------------------------------------------------------------|
| Journal:                        | <i>BMJ Open</i>                                                                                                                                                                                                                                                                                                                                                                                                                                                                                                                                                     |
| Manuscript ID:                  | bmjopen-2014-005691                                                                                                                                                                                                                                                                                                                                                                                                                                                                                                                                                 |
| Article Type:                   | Research                                                                                                                                                                                                                                                                                                                                                                                                                                                                                                                                                            |
| Date Submitted by the Author:   | 14-May-2014                                                                                                                                                                                                                                                                                                                                                                                                                                                                                                                                                         |
| Complete List of Authors:       | Thomas, Rae; Bond University, Faculty of Health Sciences and Medicine<br>Glasziou, Paul; Bond University, Faculty of Health Sciences and Medicine<br>Rychetnik, Lucie; University of Notre Dame Australia, School of Medicine<br>Sydney; University of Sydney, School of Public Health<br>MacKenzie, Geraldine; Bond university, Faculty of Law<br>Gardiner, Robert; University of Queensland, Centre for Clinical Research &<br>Department of Urology, Royal Brisbane & Women's Hospital<br>Doust, Jenny; Bond University, Faculty of Health Sciences and Medicine |
| <b>Primary Subject Heading</b>: | Public health                                                                                                                                                                                                                                                                                                                                                                                                                                                                                                                                                       |
| Secondary Subject Heading:      | General practice / Family practice, Health policy                                                                                                                                                                                                                                                                                                                                                                                                                                                                                                                   |
| Keywords:                       | Health policy < HEALTH SERVICES ADMINISTRATION & MANAGEMENT,<br>PRIMARY CARE, PUBLIC HEALTH                                                                                                                                                                                                                                                                                                                                                                                                                                                                         |
|                                 |                                                                                                                                                                                                                                                                                                                                                                                                                                                                                                                                                                     |

SCHOLARONE™  
Manuscripts

only

**Title Page**

Deliberative democracy and cancer screening consent: a randomised control trial of the effect of a community jury on men's knowledge about and intentions to participate in PSA screening.

**Authors**

Rae Thomas<sup>1</sup>  
Paul Glasziou<sup>1</sup>  
Lucie Rychetnik<sup>2</sup>  
Geraldine Mackenzie<sup>3</sup>  
Robert Gardiner<sup>4</sup>  
Jenny Doust<sup>1</sup>

<sup>1</sup>Centre for Research in Evidence-Based Practice (CREBP), Faculty of Health Sciences and Medicine, Bond University, Queensland, Australia

<sup>2</sup>School of Medicine, University of Notre Dame, Sydney, NSW, Australia and School of Public Health, University of Sydney, NSW, Australia

<sup>3</sup>Faculty of Law, Bond University, Queensland, Australia

<sup>4</sup>University of Queensland Centre for Clinical Research & Department of Urology, Royal Brisbane & Women's Hospital, Queensland, Australia

Abstract word count: 300

Manuscript word count: 2808

Corresponding Author:

Rae Thomas

Centre for Research in Evidence-Based Practice (CREBP), Faculty of Health Sciences and Medicine, Bond University, Queensland, Australia

Tel: +617 55955521

Fax +617 55951271

Email [rthomas@bond.edu.au](mailto:rthomas@bond.edu.au)

## Abstract

**Objective** Prostate-specific antigen (PSA) screening is controversial. A community jury allows presentation of complex information and may clarify how participants view screening after being well-informed of the benefits and harms. We sought to determine whether participating in a community jury had an effect on men's knowledge about and their intention to participate in PSA screening.

**Design** Participants were randomly allocated to either a 2-day community jury or a control group, with pre- post- and three-month follow-up.

**Setting** Community members from the Gold Coast (Australia) were recruited via radio, newspaper, and community meetings.

**Participants** Twenty-six eligible men aged 50-70 years with no previous diagnosis of prostate cancer.

**Intervention** The control group (n= 14) received factsheets on PSA screening. Community jury participants (n= 12) received the same factsheets and further information about screening for prostate cancer. In addition, three experts presented information on PSA screening: a neutral scientific adviser provided background information, one expert emphasised the potential benefits of screening, and another expert emphasised the potential harms. Participants discussed this information, asked questions of the experts and deliberated on personal and policy decisions.

**Main Outcome and Measures** Our primary outcome was change in individual intention to have a PSA screening test. We also assessed knowledge about screening for prostate cancer.

**Results** All analyses were conducted using intention-to-treat. Immediately after the jury, the community jury group had less intention-to-screen for prostate cancer than men in the control group (effect size = -0.6SD,  $p=0.05$ ). This was sustained at three-month follow-up.

1  
2  
3 Community jury men also answered more knowledge questions correctly and considered  
4 themselves more informed (effect size 1.2SD,  $p < 0.001$ ).  
5  
6

7 **Conclusions** Evidence-informed deliberation of the harms and benefits of PSA screening  
8 effects men's individual choice to be screened for prostate cancer. Community juries may be  
9 a valid method for eliciting target group input to policy decisions.  
10  
11  
12

13  
14  
15  
16 **Trial Registration** Australian and New Zealand Clinical Trials Registry  
17  
18 (ACTRN12612001079831) <http://www.anzctr.org.au>  
19  
20

#### 21 22 23 **Strengths and limitations of this study**

- 24  
25 • This is the first study to use scientific methods to evaluate the effect of a community  
26 jury on an individual's knowledge and decisions.  
27
- 28  
29 • Participants in community juries make value-based decisions from complex  
30 information and can differentiate individual from community choices.  
31  
32
- 33  
34 • Expert presentations were based on large population studies that have limitations.  
35
- 36  
37 • The sample size of this study was small, but the results were clear and sustained.  
38
- 39  
40 • How sampling, recruitment techniques, and group processes affect community jury  
41 outcomes are yet to be examined.  
42  
43  
44  
45  
46  
47  
48  
49  
50  
51  
52  
53  
54  
55  
56  
57  
58  
59  
60

## Introduction

Screening for prostate cancer by prostate-specific antigen (PSA) testing is controversial<sup>1</sup> and the benefits and harms of screening are uncertain.<sup>2</sup> The results of two large randomised controlled trials of population screening (the ERSPC trial in Europe<sup>3</sup> and the PLCO trial in the United States<sup>4</sup>) were much anticipated, but the equivocal results have led to conflicting interpretations and recommendations from expert groups.<sup>5,6</sup> Given the uncertainty, most guidelines recommend that men should be fully informed of the potential advantages and disadvantages of screening prior to having a PSA test.<sup>5,7,8</sup> Although individuals vary in the degree to which they want to engage with the evidence about their health concerns, a majority consistently report an interest in sharing health care decisions with their treating doctor.<sup>9,10</sup> However, providing the complex information relevant to men who are interested in PSA screening remains challenging.

Citizens' deliberation methodologies, such as community juries can facilitate the communication of complex evidence and aim to elicit 'informed' community perspectives for the purpose of guiding services and public policy. A range of community jury processes have been described, but the common features are i) participants are drawn from the lay public; ii) the jury deliberates on a question requiring an ethics or values-based decision (as opposed to a problem requiring a technical solution); iii) the jury is provided with information on the relevant issues and possible positions from expert "witnesses", with the opportunity to ask them questions; and iv) the jury then engages in a deliberation phase with participants discussing their preferences, opinions, values and positions, and attempt to reach a consensus position.<sup>11</sup>

Community juries have been conducted on topics such as public health priorities,<sup>12</sup> mammography screening,<sup>13</sup> and health research.<sup>14,15</sup> A recent review of deliberation methodologies found only four unique studies that compared deliberative methodologies with

1  
2  
3 a control group; only two of these were in relation to health topics.<sup>11</sup> While theoretically  
4  
5 sound,<sup>11</sup> community juries are a resource-intensive process and it is uncertain whether the  
6  
7 views of those participating are better “informed” than those of a public provided with  
8  
9 reading material on the same topic. It is also unclear whether and how being informed  
10  
11 influences a jury’s conclusions. If community juries are to be used to inform screening  
12  
13 policy, it is essential to understand the capacity of a community jury process to support  
14  
15 better-informed conclusions by its participants.  
16  
17

18  
19 The aim of this study was to examine the degree to which participants of a community  
20  
21 jury on PSA screening of asymptomatic men were better “informed” than other citizens and,  
22  
23 based on the ERSPC<sup>3</sup> and PLCO<sup>4</sup> trials together with the general practice guidelines, whether  
24  
25 evidence-informed deliberations of the benefits and harms of PSA screening impact on men’s  
26  
27 intention to be screen for prostate cancer. We conducted a randomised controlled trial that  
28  
29 compared a community jury with men allocated to receive typical information. As part of the  
30  
31 community jury process, men were also asked to deliberate on two community focused  
32  
33 questions:  
34

- 35  
36 • Should government campaigns be provided (on PSA screening) and if so, what  
37  
38 information should be included in those campaigns?
- 39  
40 • What do you as a group of men think about a government organised invitation  
41  
42 program for testing for prostate cancer?  
43  
44

45  
46 This is the first randomised controlled trial of a deliberative democracy process on the topic  
47  
48 of PSA screening.  
49

## 50 51 52 **Method**

53  
54 We recruited men in the target age group of 50 to 70 years from the Gold Coast region  
55  
56 (Australia) who had no previous diagnosis of prostate cancer, using media advertisements,  
57  
58  
59  
60

1  
2  
3 radio interviews, and community groups. Men with a family history of prostate cancer were  
4  
5 not excluded from participating. Eligible and available respondents attended a session on a  
6  
7 Friday evening to receive a full briefing on the study; all agreed to participate and completed  
8  
9 a consent form, before being randomly allocated to either a community jury group or a  
10  
11 control group (Figure 1). Random allocation occurred by each man selecting a piece of paper  
12  
13 with the name of either group from an opaque container. The research project was approved  
14  
15 by the Bond University Human Research Ethics Committee (R01570) and the protocol  
16  
17 registered with the Australian and New Zealand Clinical Trials Registry  
18  
19 (ACTRN12612001079831).  
20  
21  
22

23 All men were given standard PSA fact sheets from the Cancer Council Australia and  
24  
25 Andrology Australia.<sup>16,17</sup> In addition to the factsheets, men in the community jury group also  
26  
27 received a Cochrane Collaboration plain language statement,<sup>2</sup> information from the Royal  
28  
29 Australian College of General Practitioners' Guidelines for "Preventive Activities in General  
30  
31 Practice" pertaining to screening for prostate cancer,<sup>7</sup> and the Executive Summary of "PSA  
32  
33 Testing" from the Urology Society of Australia and New Zealand.<sup>8</sup> Men in both groups  
34  
35 received \$20 gift cards as reimbursement for their time at the introductory session and for  
36  
37 each survey. The community jury group received an \$80 gift card as reimbursement for  
38  
39 attending the community jury weekend. Men in the control group were given a follow-up  
40  
41 survey with a return stamped envelope to be mailed after the weekend.  
42  
43  
44

45 The community jury weekend and a qualitative analysis of the jury deliberations have  
46  
47 been described in detail elsewhere.<sup>18</sup> In brief, the community jury consisted of an iterative  
48  
49 process of education and deliberation. Three experts presented to the community jury on day  
50  
51 one: a neutral scientific advisor discussed medical information regarding the role of the  
52  
53 prostate, screening tests (including PSA and Digital Rectal Examination), explanations about  
54  
55 changes to PSA levels, how cancer is detected, and treatment options and potential outcomes  
56  
57  
58  
59  
60

1  
2  
3 (Jim Dickinson, Professor of Family Medicine, University of Calgary). Two further experts  
4  
5 (a urologist and expert in prostate cancer (author RG) and an expert in evidence-based  
6  
7 medicine (author PG) presented the benefits and harms of being screened for prostate cancer.  
8  
9 Although both speakers aimed to give balanced presentations, one emphasised the benefits of  
10  
11 PSA screening, in particular selective screening, (RG <http://youtu.be/9vPt3NAcG8g>) and the  
12  
13 other the harms (PG <http://youtu.be/nifkjdZKmsU>). Both presentations focused on the  
14  
15 evidence from the two trials of PSA population screening. However, both presenters also  
16  
17 made reference to lower levels of evidence relating to the risks of metastases if a cancer  
18  
19 remains undetected due to a lack of screening and the consequences of treating localised  
20  
21 disease detected during screening. Each presentation ran for approximately 45 minutes, with  
22  
23 15 minutes for questions. After each presentation, men were able to deliberate on the  
24  
25 information and could ask the experts any questions. The men reflected on the information  
26  
27 overnight and returned on Sunday to deliberate and discuss the information presented the day  
28  
29 before, including asking any further questions of the expert witnesses by phone.  
30  
31  
32  
33

34 A nominal group technique was used on both days to elicit individual thoughts prior to  
35  
36 group deliberations. After the final deliberations on Sunday, including the community level  
37  
38 decisions, the men in the community jury completed the post-assessment survey. Men in the  
39  
40 control group were contacted on the Monday and either completed the post-assessment  
41  
42 survey by phone or mailed the survey back to researchers the same week. Three months after  
43  
44 the community jury weekend, all men in both groups were re-contacted and completed a  
45  
46 follow-up survey.  
47  
48

### 49 **Non-protocol Extension**

50  
51 Because they indicated a strong desire to have the experience of the community jury  
52  
53 weekend, after their three-month follow-up survey the control group was offered the same  
54  
55 community jury experience. Six of the 14 men randomised to the control group participated  
56  
57  
58  
59  
60



1  
2  
3 in the second community jury (Figure 1). The two primary experts were the same as for the  
4  
5 original community jury group, however, the scientific advisor was changed to a female  
6  
7 general practitioner and professor of clinical epidemiology (author JD). A final post-jury  
8  
9 survey was conducted with the second community jury.  
10

## 11 **Measures**

12  
13  
14 We collected demographic information, history of previous PSA testing and  
15  
16 information sources for PSA screening at the introductory session. In each of the three  
17  
18 surveys, men were asked to nominate on a scale 0 to 10 (0 = *not at all*, 5 = *maybe*, and 10 =  
19  
20 *absolutely*), whether they intended, while symptomless, to undergo PSA screening for  
21  
22 prostate cancer in the future. They were also asked to nominate how informed they  
23  
24 considered themselves in relation to the harms and benefits of screening for prostate cancer  
25  
26 on a scale 0 to 4 (0 = *not at all* and 4 = *very*). We asked six knowledge questions in each  
27  
28 survey that assessed a) the men's knowledge about the recommendation on PSA screening in  
29  
30 the Australian general practice guidelines,<sup>7</sup> b) the likelihood of being diagnosed with prostate  
31  
32 cancer,<sup>19</sup> c) the likelihood of dying of prostate cancer,<sup>19</sup> d) the accuracy of the PSA test and e)  
33  
34 two questions about treatment options and side-effects of prostate cancer treatment (Box 1).  
35  
36 Australia has a primary care based system, requiring a referral from a general practitioner to  
37  
38 see a urologist. General practitioners are therefore responsible for the majority of the PSA  
39  
40 screening tests requested in Australia. For this reason, we were interested in the participants'  
41  
42 knowledge of current general practice guidelines.  
43  
44  
45  
46

## 47 **Statistical Analyses**

48  
49 Pre- to post-, and post- to follow-up assessment differences between the groups were  
50  
51 examined with ANCOVA and Fisher's exact test. It was anticipated that the number of PSA  
52  
53 tests previously undertaken would impact on a man's future decision to be screened for  
54  
55 prostate cancer with the PSA test.<sup>20</sup> Therefore we conducted the analyses with adjustment for  
56  
57  
58  
59  
60

1  
2  
3 baseline intention-to-screen and the number of times a man had already received a PSA test.  
4  
5 Unadjusted post-assessment analyses were conducted using an independent t-test. All  
6  
7 analyses were conducted on an intention-to-treat basis.  
8  
9

## 10 11 12 **Results**

### 13 14 **Participant Demographics**

15  
16 Of the 59 men who contacted the research team, 27 respondents were available on the set  
17  
18 date and elected to participate in the study. One man was excluded post-randomisation as his  
19  
20 age exceeded the limit of the study (see Figure 1). Participating men's ages ranged between  
21  
22 53 and 70 years (average 62 years,  $SD = 4.8$ ). Further demographic information is described  
23  
24 in Table 1. There was no loss to follow up during the course of the study. The groups were  
25  
26 similar at baseline in age, number of times previously screened for prostate cancer, and  
27  
28 whether they intended to be screened for prostate cancer in the future. All but 3 men had  
29  
30 previously had a PSA test; 14 had been tested 2 or 3 times, 4 on one occasion, two 6 times,  
31  
32 and 3 men had been tested on 7, 8, and 12 occasions each. No men had undergone a biopsy.  
33  
34 At pre-assessment, the majority of men (16/26, 62%) agreed with the statement that routine  
35  
36 screening for prostate cancer saved lives, whereas 4 (15%) disagreed and 6 (23%) did not  
37  
38 know (Table 1). The men reported a variety of sources for how they accessed information  
39  
40 about prostate cancer screening, with the most common source of information being their  
41  
42 general practitioner (Table 2).  
43  
44  
45  
46

### 47 **Changes in Intention-to-Screen and Individual Knowledge**

48  
49 **Pre-to post-intervention.** At post-assessment, men in the community jury group had  
50  
51 significantly less intention-to-screen for prostate cancer on the 0 to 10 scale than men in the  
52  
53 control group (median score 2.5 and 7.0, Effect Size=  $-0.6SD$ ,  $p=0.05$ ). When we adjusted  
54  
55 for baseline intention to be screened for prostate cancer and the number of prior PSA tests,  
56  
57  
58  
59  
60

1  
2  
3 the mean difference was 3.7 ( $p=.005$ , Table 3). The unadjusted mean difference between the  
4  
5 groups was 2.7 (Figure 2).  
6

7  
8 After completion of the community jury weekend, men in the jury group considered  
9  
10 themselves more informed about screening for prostate cancer than the control group (median  
11  
12 score 4.0 and 2.0, mean difference = 1.7, Effect Size=1.2SD,  $p<0.001$ ). Compared with the  
13  
14 control group, the community jury participants were more likely to “correctly” identify how  
15  
16 many men out of 1000 would be likely to die from prostate cancer as indicated in the  
17  
18 knowledge question from Fagerlin et al<sup>19</sup> ( $p=0.004$ ), but not how many would be diagnosed<sup>19</sup>  
19  
20 ( $p=.44$ ). The community jury group was also more likely to correctly identify that the PSA  
21  
22 test was not always accurate in indicating the likelihood of prostate cancer as it had both false  
23  
24 positive and false negative results ( $p=0.03$ , Table 4).  
25  
26

27  
28 **Post-to 3 month follow-up assessment.** The influence of the community jury  
29  
30 experience was sustained at 3 months: men in the community jury group maintained their  
31  
32 intention-to-screen score at 3 months (Figure 2) whereas there was a slight increase in the  
33  
34 control group’s future intention-to-screen for prostate cancer. There was no further change in  
35  
36 knowledge (Table 5).  
37

### 38 **Community Level Questions**

39  
40 Men in the community jury voted unanimously (12/12) against a government campaign  
41  
42 targeting the public about PSA screening for prostate cancer, and against a government  
43  
44 organised invitation program. Unprompted, the jury members instead suggested the  
45  
46 government provide a campaign that targeted general practitioners to assist them to provide  
47  
48 better quality and more consistent information to their patients on the benefits and harms of  
49  
50 screening for prostate cancer using the PSA test.<sup>18</sup>  
51  
52

53  
54 **Non-protocol Extension.** Compared with their 3-month follow-up scores, the men  
55  
56 from the control group who completed the second community jury also subsequently  
57  
58  
59  
60

1  
2  
3 increased their self-report score of how informed they considered themselves (mean score  
4 increased from 2.2 to 3.7), and decreased their future intention to be screened for prostate  
5 cancer (mean score decreased from 8 to 2.8). There were similar pre-to-post changes in  
6 knowledge among those who participated in the second community jury: 68% were able to  
7 correctly identify how many men out of 1000 might die from prostate cancer and 50%  
8 correctly answered how many men would be diagnosed with prostate cancer in their  
9 lifetimes.  
10  
11  
12  
13  
14  
15  
16  
17  
18

### 19 Discussion

20 Compared with men who received standard information, participants in a 2-day  
21 community jury considered themselves better informed about the benefits and harms of PSA  
22 screening and reduced their stated intention to participate in screening in the future. Although  
23 the process led to some men to changing their minds about participating in PSA screening,  
24 others said they would continue to be tested; highlighting the individual nature of this  
25 decision and the need for informed consent.<sup>21</sup>  
26  
27  
28  
29  
30  
31  
32  
33

34 Yet despite differences in the men's individual intentions to be screened for prostate  
35 cancer, the group was unanimous in opposing any government-sponsored community  
36 campaign. Our findings demonstrate the capacity of a community jury to consider complex  
37 information on the harms and benefits of screening, and to distinguish individual from  
38 community choices. This echoes the findings of a New Zealand community jury on  
39 mammography screening<sup>13</sup> which also indicated that community juries are able to  
40 differentiate between individual and public health needs.  
41  
42  
43  
44  
45  
46  
47  
48

49 All deliberative democracy methods rely on engagement of those who have an interest  
50 in the topic and agree to take part. The generalisability of our study findings may be limited  
51 by the uncertain representativeness of a jury of volunteers from the Gold Coast, Australia,  
52 who may be different in several ways to men in the wider Australian community. For  
53  
54  
55  
56  
57  
58  
59  
60

1  
2  
3 example, 88% of our participants had already had at least one PSA test, implying that prior to  
4  
5 the community jury they were more likely to be favorably disposed to PSA screening.  
6

7  
8 The authors considered PSA screening an appropriate topic for engaging middle-aged  
9  
10 men because the data are equivocal and guidelines differ.<sup>2,7,8</sup> However, we also acknowledge  
11  
12 the limitations of these mass population studies. Neither the ERSPC<sup>3</sup> nor PLCO<sup>4</sup> trials has a  
13  
14 median follow-up long enough to reliably address prostate cancer mortality and their  
15  
16 respective methodologies have been criticised.<sup>22</sup> This limitation may have impacted the  
17  
18 community jury decision. Nevertheless, this pilot study does illustrate the potential of the  
19  
20 community jury approach to instruct a cross section of men of different ages, with different  
21  
22 backgrounds, and educational levels.  
23

24  
25 Whether and how sampling and recruitment techniques affect community jury  
26  
27 outcomes are important research questions yet to be examined. Other important  
28  
29 methodological questions for community research include: what are the impacts on group  
30  
31 decisions of normative (conformity to group thinking) or informational (discussion of facts)  
32  
33 influences?<sup>23</sup> and when and how in the deliberation process do community jury participants  
34  
35 form their conclusions?  
36  
37

38  
39 Our results have implications for clinical and public health practice. A large proportion  
40  
41 of men have not been engaged in an evidence-informed discussion of the potential benefits  
42  
43 and harms of screening prior to their physician ordering a PSA test<sup>24,25</sup>; have not been asked  
44  
45 about their screening preferences prior to a PSA screening test<sup>26</sup>; and some doctors screen  
46  
47 without a discussion.<sup>27</sup> Alarming, a study conducted in the theatre waiting room in men  
48  
49 waiting to undergo a trans rectal ultrasound and prostate biopsy found 8% were unaware their  
50  
51 primary care provider had conducted a PSA screening test.<sup>28</sup> Current practice of PSA  
52  
53 screening in asymptomatic men is not standardised. Our findings reinforce the importance of  
54  
55 presenting the potential benefits and harms of PSA testing to men interested in being  
56  
57  
58  
59  
60

1  
2  
3 screened, primarily because such information will lead some men to change their mind once  
4 fully informed. When practitioners are faced with the difficult situation of being asked to  
5 determine such a decision on behalf of their patient, in addition to considering their  
6 individual patient's history, concerns, and priorities, it may be valuable to also have available  
7 information about community attitudes and concerns regarding screening.<sup>21</sup>  
8  
9  
10  
11  
12  
13

14  
15  
16 **Contributors** RT led the preparations and revisions of the manuscript, had full access to all  
17 of the data in the study and takes responsibility for the accuracy of the data analyses. PG and  
18 JD led the conception and design of the study, contributed to the interpretation of the data,  
19 and made substantial revisions to the manuscript. LR contributed to the study design and  
20 made substantial revisions to the manuscript. GM and RG contributed to the study design,  
21 interpretation of data and made significant revisions to the manuscript.  
22  
23  
24  
25  
26  
27  
28

29 We thank Jim Dickinson PhD FRACGP, Professor of Family Medicine, University of  
30 Calgary, Canada for kindly providing his scientific expertise as our scientific advisor in the  
31 community jury. He did not receive compensation for his contribution. We also thank Sir Iain  
32 Chalmers DSc, James Lind Initiative, Oxford, UK for his helpful comments on an earlier  
33 draft.  
34  
35  
36  
37  
38  
39

40 **Funding Support** This work was supported by a Bond University Vice Chancellor's  
41 Research Grant Scheme, an Australian National Health and Medical Research Council  
42 (NHMRC) Project Grant (#1023791), and a NHMRC Screening and Test Evaluation  
43 Program (STEP) grant (#633033).  
44  
45  
46  
47  
48

49 **Competing Interests** All authors have completed the ICMJE uniform disclosure form and  
50 declare: RT, JD, PG, and GM received funding support from Bond University; RT, JD and  
51 PG also received funding support from a NHMRC Program grant (#633033); LR received  
52  
53  
54  
55  
56  
57  
58  
59  
60

## A Community Jury and PSA Screening 14

1  
2  
3 funding support from a NHMRC funding grant (#1023197); no other relationships or  
4  
5 activities that could appear to have influenced the submitted work.  
6

7 **Ethics Approval** The research project was approved by the Bond University Human  
8  
9 Research Ethics Committee (RO1570).  
10

11 **Data Sharing Statement** Additional data is available by emailing author Rae Thomas.  
12  
13  
14  
15  
16  
17  
18  
19  
20  
21  
22  
23  
24  
25  
26  
27  
28  
29  
30  
31  
32  
33  
34  
35  
36  
37  
38  
39  
40  
41  
42  
43  
44  
45  
46  
47  
48  
49  
50  
51  
52  
53  
54  
55  
56  
57  
58  
59  
60

## References

1. Katz MH. Can we stop ordering prostate-specific antigen screening tests? *JAMA Intern Med* 2013;173(10): 847-8.
2. Ilic D, Neuberger MM, Djulbegovic M, Dahm P. Screening for prostate cancer. The Cochrane Database of Syst Rev 2013;Issue 1. Art No.:CD004720. doi: 10.1002/14651858.CD004720.pub3.
3. Schröder FH, Hugosson J, Roobol MJ, Tammela TLJ, Ciatto S, Nelen V, et al. Prostate-Cancer Mortality at 11 Years of Follow-up. *N Engl J Med* 2012;366(11):981-90.
4. Andriole GL, Crawford ED, Grubb RL, 3rd, Buys SS, Chia D, Church TR, et al. Prostate cancer screening in the randomized Prostate, Lung, Colorectal, and Ovarian Cancer Screening Trial: mortality results after 13 years of follow-up. *J Natl Cancer Inst* 2012;104(2):125-32.
5. Moyer VA. Screening for Prostate Cancer: U.S. Preventive Services Task Force Recommendation Statement. *Ann Intern Med* 2012;157(2):120-34.
6. Carter HB, Albertsen PC, Barry MJ, Etzioni R, Freedland SJ, Greene KL, et al. Early detection of prostate cancer: AUA Guideline. *J Urol* 2013;190(2):419-26. doi:10.1016/j.juro.2013.04.119
7. Guidelines for preventive activities in general practice, 8th edn. East Melbourne: Royal Australian College of General Practitioners, 2012.
8. Urology Society of Australia and New Zealand PSA testing policy accessed April 2013 from [http://www.usanz.org.au/uploads/29168/ufiles/USANZ\\_2009\\_PSA\\_Testing\\_Policy\\_Final.pdf](http://www.usanz.org.au/uploads/29168/ufiles/USANZ_2009_PSA_Testing_Policy_Final.pdf).
9. Benbassat J, Pilpel D, Tidhar, M. Patients' preferences for participation in clinical decision making: A review of published studies. *Behav Med* 1998;2:81-88. doi: 10.1080/08964289809596384
10. Deber RB, Kraetschmer N, Urowitz S, Sharpe N. Do people want to be autonomous patients? Preferred roles in treatment decision-making in several patient populations. *Health Expect* 2007;10:248-258. doi: 10.1111/j.1369-7625.2007.00441.x
11. Carman KL, Heeringa JW, Heil SKR, Garfinkel S, Windham A, Gilmore D, Ginsburg M, Sofaer S, Gold M, Pathak-Sen E. The Use of Public Deliberation in Eliciting Public Input: Findings from a Literature Review. (Prepared by the American Institutes for Research Under Contract No. 290-02-0009.) AHRQ Publication No. 13-EHC070-EF. Rockville, MD: Agency for Healthcare Research and Quality; February 2013



12. Abelson J, Eyles J, McLeod CB, Collins P, McMullan C, Forest PG. Does deliberation make a difference? Results from a citizens panel study of health goals priority setting. *Health Policy* 2003;66(1):95-106.
13. Paul C, Nicholls R, Priest P, McGee R. Making policy decisions about population screening for breast cancer: The role of citizens' deliberation. *Health Policy* 2008;85(3):314-20.
14. De Vries R, Stanczyk A, Wall IF, Uhlmann R, Damschroder LJ, Kim SY. Assessing the quality of democratic deliberation: A case study of public deliberation on the ethics of surrogate consent for research. *Soc Sci Med* 2010;70:1896-1903.  
doi:10.1016/j.socscimed.2010.02.031
15. Parkin L, Paul C. Public good, personal privacy: a citizens' deliberation about using medical information for pharmacoepidemiological research. *J Epidemiol Community Health* 2011;65:150-156. doi:10.1136/jech.2009.097436
16. Australian Cancer Council Factsheet: Early Detection of Prostate Cancer Accessed April 2013 from [http://www.cancer.org.au/content/pdf/Factsheets/Early\\_Detection\\_prostate-cancer-2013-revised.pdf](http://www.cancer.org.au/content/pdf/Factsheets/Early_Detection_prostate-cancer-2013-revised.pdf)
17. Andrology Australia Factsheet: PSA testing Accessed April 2013 from [https://www.andrologyaustralia.org/wp-content/uploads/Factsheet\\_PSA-Test.pdf](https://www.andrologyaustralia.org/wp-content/uploads/Factsheet_PSA-Test.pdf)
18. Rychetnik L, Doust J, Thomas R, Gardiner R, MacKenzie G, Glasziou P. A community jury on PSA screening: What do well-informed men want the government to do about prostate cancer screening? *BMJ Open* 2014;4:e004682. doi:10.1136/bmjopen-2013-004682
19. Fagerlin A, Sepucha KR, Couper MP, Levin CA, Singer E, Zikmund-Fisher B. Patients' knowledge about 9 common health conditions: The DECISIONS survey. *Med Decis Making* 2010;30:35S.
20. Staw BM. The escalation of commitment to a course of action. *Academy of Management* 1981;6(4):577-87.
21. Irwig L, Glasziou P. Informed consent for screening by community sampling. *Eff Clin Pract* 2000; 3(1):47-50.
22. National Health and Medical Research Council (2013). *Prostate-Specific Antigen (PSA) testing in asymptomatic men: Evidence Evaluation Report*. Canberra: National Health and Medical Research Council.

- 1  
2  
3  
4  
5  
6  
7  
8  
9  
10  
11  
12  
13  
14  
15  
16  
17  
18  
19  
20  
21  
22  
23  
24  
25  
26  
27  
28  
29  
30  
31  
32  
33  
34  
35  
36  
37  
38  
39  
40  
41  
42  
43  
44  
45  
46  
47  
48  
49  
50  
51  
52  
53  
54  
55  
56  
57  
58  
59  
60
23. Kaplan MF, Miller CE. Group decision making and normative versus informational influence: Effects of type of issue and assigned decision rule. *J Personality and Social Psychology* 1987;53(2):306-13.
24. Chan ECY, Vernon SW, Ahn C, Greisinger A. Do men know that they have had a prostate specific antigen test? Accuracy of self-reports of testing at 2 sites *Am J Public Health* 2004;94(8):1336-8.
25. Guerra CE, Jacobs SE, Holmes JH, Shea JA. Are physicians discussing prostate cancer screening with their patients and why or why not? A pilot study. *J Gen Intern Med* 2007;22(7):901-7.
26. Hoffman RM, Couper MP, Zikmund-Fisher BJ, Levin CA, McNaughton-Collins M, Helitzer DL, VanHoewyk J, Barry MJ. Prostate cancer screening decisions. Results from the National Survey of Medical Decisions (DECISIONS Study). *Arch Intern Med* 2009;169(17):1611-1618.
27. Volk RJ, Linder SK, Kallen MA, Galliher JM, Spano MS, Mullen PD, Spann SJ. Primary care physicians' use of an informed decision-making process for prostate cancer screening. *Ann Fam Med* 2013;1:67-74.
28. Pan D, McCahy P. Patient knowledge about prostate-specific antigen (PSA) and prostate cancer in Australia. *BJU Int* 2012: Sup 3:52-56

**Box 1****Knowledge Questions from Surveys (answers considered correct highlighted)**

1. Is routine testing for prostate cancer recommended by RACGP Guidelines?

- Yes  No  Don't know

2. Out of every 1000 men, about how many do you think will be diagnosed with prostate cancer some time in their life? \*

- 0  1-14  15-25  >25  Don't know

3. Out of every 1000 men, about how many do you think will die from prostate cancer? \*

- 0  1-5  6-10  11-20  >20  Don't know

4. How accurate do *you* think the prostate specific antigen (PSA) blood test is for diagnosing prostate cancer?

- Reasonably accurate but some people *who do* have cancer can have a negative test result (false negative)

- Reasonably accurate but some people *who do not* have cancer can have an abnormal result (false positive)

- The PSA test is not always accurate because it can have both false positive or false negative results

- The PSA test is completely accurate

- Don't know

5. In terms of your knowledge about Prostate cancer, could you list some treatment options?

- No  Yes, please list

6. Could you list some potential side effects of treatments for prostate cancer?

- No  Yes, please list

---

\* questions from Fagerlin A, Sepucha KR, Couper MP, Levin CA, Singer E Zikmund-Fisher

B. Patients' knowledge about 9 common health conditions: The DECISIONS survey. *Med Decis Making* 2010;30:35S.

Figure 1 Consort Flow-Chart of Participants

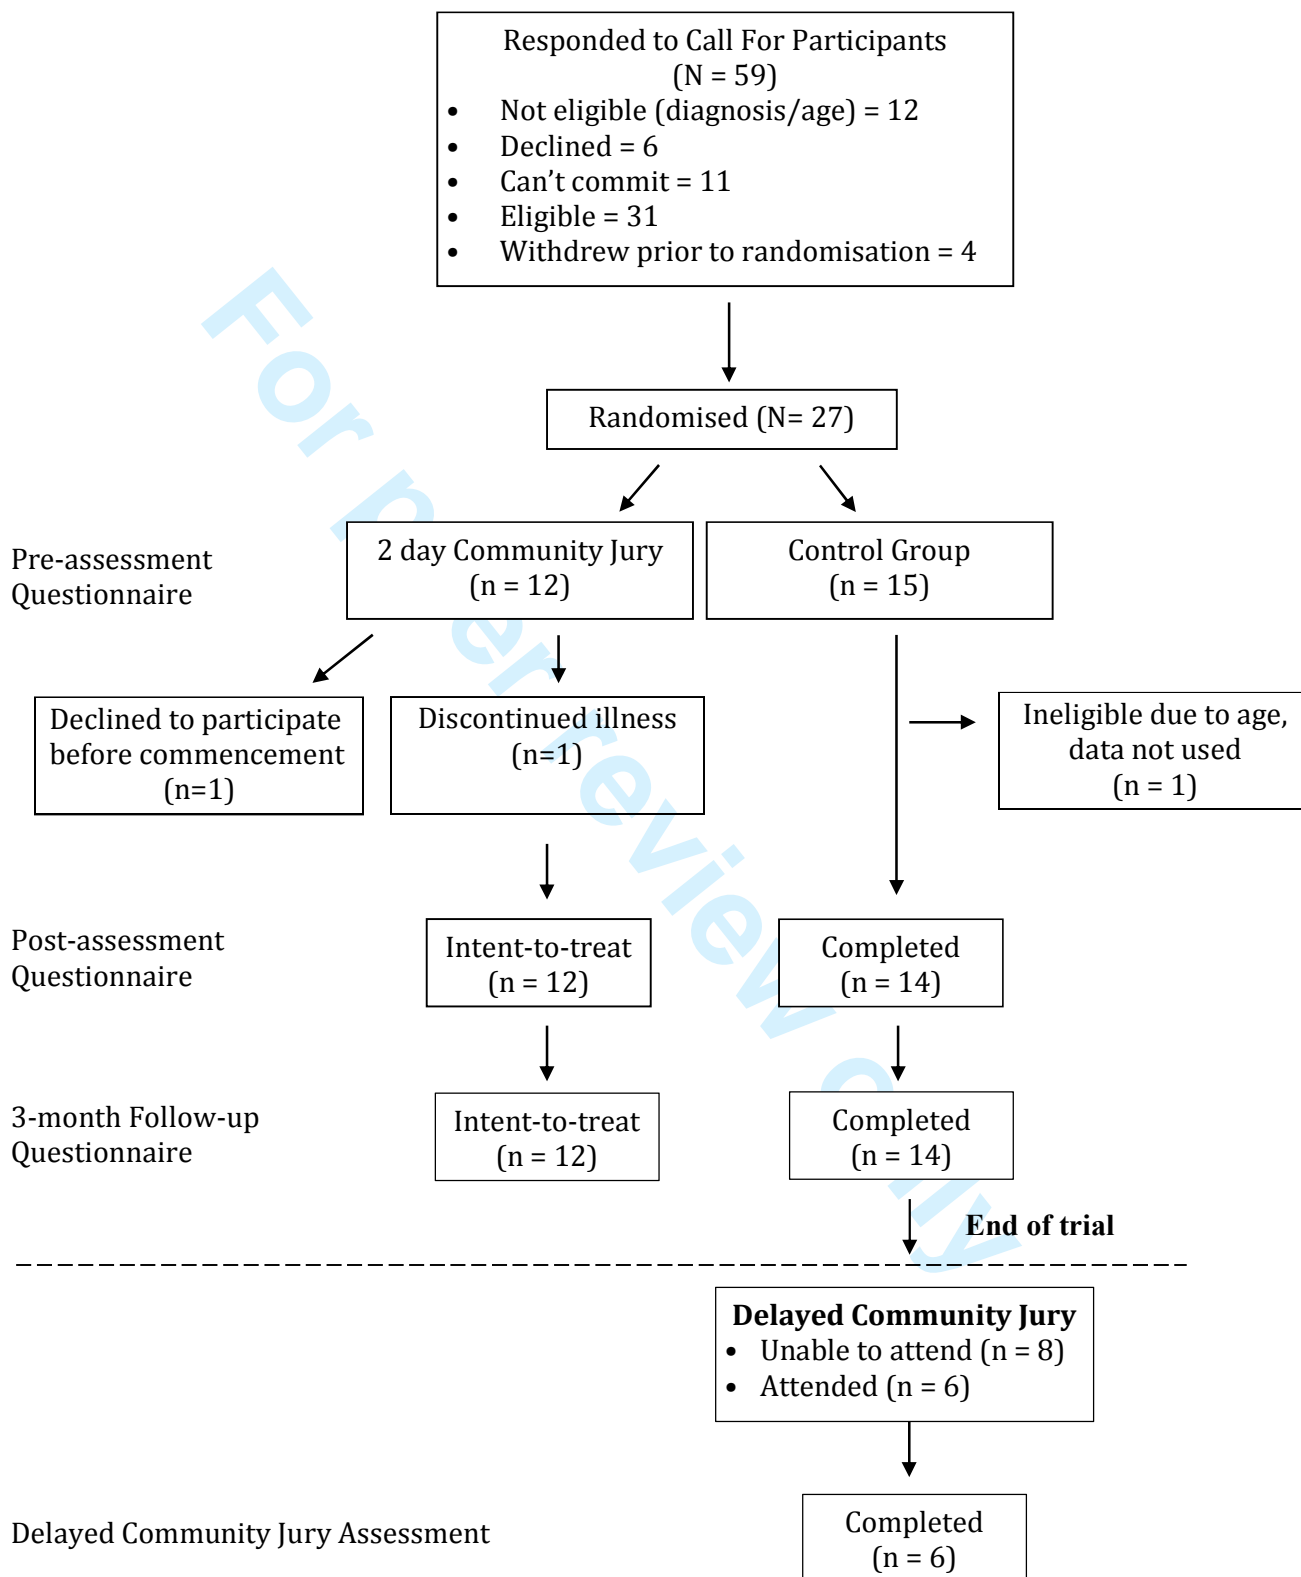

Figure 2 Future Intention-to-Screen Scores at Pre, Post, and Three Month Follow-up

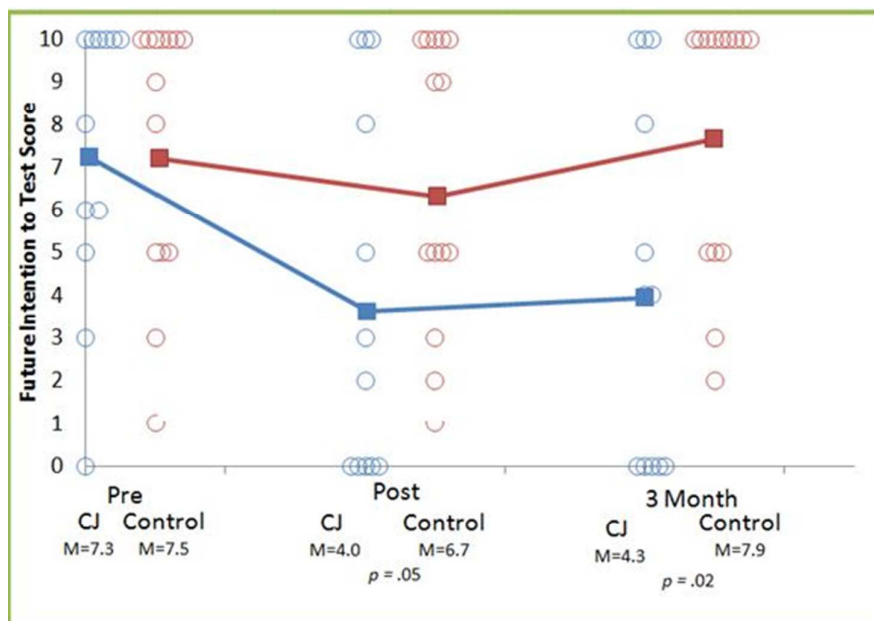

Note: CJ=Community Jury group; M = mean score; p values based on ANCOVA analyses pre to post and pre to 3 month follow-up.

1  
2  
3  
4  
5  
6  
7  
8  
9  
10  
11  
12  
13  
14  
15  
16  
17  
18  
19  
20  
21  
22  
23  
24  
25  
26  
27  
28  
29

|                                                                                |                     | Community<br>Jury<br>(n=12) | (SD/%) | Control<br>(n=14) | SD/%  |
|--------------------------------------------------------------------------------|---------------------|-----------------------------|--------|-------------------|-------|
| <i>Age</i>                                                                     |                     |                             |        |                   |       |
|                                                                                | Mean                | 61                          | (4.8)  | 62                | (4.9) |
| <i>Number previous PSA tests</i>                                               |                     |                             |        |                   |       |
|                                                                                | Mean                | 3.9                         | (3.6)  | 2.2*              | (1.8) |
| <i>Routine PSA testing saves lives</i>                                         |                     |                             |        |                   |       |
| Frequency                                                                      | yes                 | 7                           | (58%)  | 9                 | (64%) |
|                                                                                | no                  | 2                           | (17%)  | 2                 | (14%) |
|                                                                                | don't know          | 3                           | (25%)  | 3                 | (21%) |
| <i>Education</i>                                                               |                     |                             |        |                   |       |
| Frequency                                                                      | High school or less | 2                           | (17%)  | 4                 | (28%) |
|                                                                                | some uni or TAFE    | 4                           | (33%)  | 4                 | (28%) |
|                                                                                | uni/TAFE graduate   | 4                           | (33%)  | 1                 | (7%)  |
|                                                                                | uni postgrad        | 2                           | (17%)  | 5                 | (36%) |
| Note. * n=13, (1 missing); TAFE = Technical and Further Education Institutions |                     |                             |        |                   |       |

30  
31  
32  
33  
34  
35  
36  
37  
38  
39  
40  
41  
42  
43  
44  
45  
46  
47  
48  
49  
50  
51  
52  
53  
54  
55  
56  
57  
58  
59  
60

|                                              | Agree | (%)  |
|----------------------------------------------|-------|------|
| I don't look for information                 | 3     | (12) |
| Family and friends                           | 11    | (42) |
| Internet                                     | 10    | (38) |
| Media                                        | 9     | (35) |
| General practitioner                         | 17    | (65) |
| Urologist/specialist/hospital                | 5     | (20) |
| Note: men could endorse more than one source |       |      |

## A Community Jury and PSA Screening 22

1  
2  
3  
4  
5  
6  
7  
8  
9  
10  
11  
12  
13  
14  
15  
16  
17  
18  
19  
20  
21  
22

|                                          | <i>Coefficient</i> | <i>SE B</i> | CI<br>Lower | CI<br>Upper | <i>p</i> |
|------------------------------------------|--------------------|-------------|-------------|-------------|----------|
| Constant                                 | -0.16              | 1.69        | -3.66       | 3.35        | 0.93     |
| Pre-assessment intention-to-screen score | 0.74               | 0.18        | 0.36        | 1.11        | 0.001    |
| Number of previous PSA tests             | 0.63               | 0.22        | 0.18        | 1.07        | 0.008    |
| Group (Community Jury/Control)           | -3.69              | 1.19        | -6.16       | -1.21       | 0.005    |

Note. N=25; CI= confidence interval;  
These data are slightly different to Rychetnik et al (2014) analyses as they are based on intention-to-treat.

23  
24  
25  
26  
27  
28  
29  
30  
31  
32  
33  
34  
35  
36  
37  
38  
39  
40  
41  
42  
43  
44  
45  
46  
47  
48  
49  
50  
51  
52  
53  
54  
55  
56  
57  
58  
59  
60

|                                          |           | Wrong to Right |      | Right to Right |      | Right to Wrong |      | Wrong to Wrong |      | <i>p</i> |
|------------------------------------------|-----------|----------------|------|----------------|------|----------------|------|----------------|------|----------|
|                                          |           | n              | (%)  | n              | (%)  | n              | (%)  | n              | (%)  |          |
| Recommended by guidelines?               | community |                |      |                |      |                |      |                |      | 0.08     |
|                                          | jury      | 4              | (42) | 3              | (25) | 1              | (8)  | 3              | (25) |          |
|                                          | control*  | 1              | (8)  | 1              | (8)  | 1              | (8)  | 10             | (77) |          |
| out of 1000, how many men are diagnosed? | community |                |      |                |      |                |      |                |      | 0.4      |
|                                          | jury      | 2              | (17) | 6              | (50) | 1              | (8)  | 3              | (25) |          |
|                                          | control   | 2              | (14) | 6              | (43) | 3              | (21) | 3              | (21) |          |
| out of 1000, how many men die?           | community |                |      |                |      |                |      |                |      | 0.004    |
|                                          | jury      | 6              | (50) | 2              | (17) | 0              | (0)  | 4              | (33) |          |
|                                          | control   | 1              | (7)  | 0              | (0)  | 1              | (7)  | 12             | (86) |          |
| how accurate is the PSA test?            | community |                |      |                |      |                |      |                |      | 0.03     |
|                                          | jury      | 6              | (50) | 4              | (33) | 1              | (8)  | 1              | (8)  |          |
|                                          | control   | 2              | (14) | 9              | (64) | 0              | (0)  | 3              | (21) |          |
| list possible treatment options          | community |                |      |                |      |                |      |                |      | 0.6      |
|                                          | jury      | 2              | (17) | 7              | (58) | 0              | (0)  | 2              | (17) |          |
|                                          | control   | 3              | (21) | 7              | (50) | 0              | (0)  | 4              | (27) |          |
| list possible side effects of treatments | community |                |      |                |      |                |      |                |      | 0.6      |
|                                          | jury      | 3              | (25) | 7              | (58) | 0              | (0)  | 2              | (17) |          |
|                                          | control   | 3              | (21) | 7              | (50) | 0              | (0)  | 4              | (27) |          |

Note: \*n=13 (1 missing)

1  
2  
3  
4  
5  
6  
7  
8  
9  
10  
11  
12  
13  
14  
15  
16  
17  
18  
19  
20  
21  
22  
23  
24  
25  
26  
27  
28  
29  
30  
31  
32  
33  
34  
35  
36  
37  
38  
39  
40  
41  
42  
43  
44  
45  
46  
47  
48  
49  
50  
51  
52  
53  
54  
55  
56  
57  
58  
59  
60

|                                          |                | Wrong to Right |      | Right to Right |      | Right to Wrong |      | Wrong to Wrong |      | <i>p</i> |
|------------------------------------------|----------------|----------------|------|----------------|------|----------------|------|----------------|------|----------|
|                                          |                | n              | (%)  | n              | (%)  | n              | (%)  | n              | (%)  |          |
| Recommended by guidelines?               | community jury | 0              | (0)  | 7              | (58) | 1              | (8)  | 4              | (33) | 0.7      |
|                                          | control*       | 0              | (0)  | 1              | (7)  | 1              | (7)  | 11             | (85) |          |
| out of 1000, how many men are diagnosed? | community jury | 1              | (8)  | 4              | (33) | 4              | (33) | 3              | (25) | 0.1      |
|                                          | control        | 0              | (0)  | 2              | (14) | 6              | (43) | 6              | (43) |          |
| out of 1000, how many men die?           | community jury | 2              | (17) | 6              | (50) | 2              | (17) | 2              | (17) | 0.6      |
|                                          | control        | 2              | (14) | 0              | (0)  | 2              | (14) | 10             | (71) |          |
| how accurate is the PSA test?            | community jury | 0              | (0)  | 10             | (83) | 0              | (0)  | 2              | (17) | 0.1      |
|                                          | control        | 2              | (14) | 9              | (64) | 2              | (14) | 1              | (7)  |          |

Note: \*n=13 (1 missing)



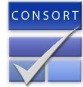

## CONSORT 2010 checklist of information to include when reporting a randomised trial\*

| Section/Topic                    | Item No | Checklist item                                                                                                                                                                              | Reported on page No |
|----------------------------------|---------|---------------------------------------------------------------------------------------------------------------------------------------------------------------------------------------------|---------------------|
| <b>Title and abstract</b>        |         |                                                                                                                                                                                             |                     |
|                                  | 1a      | Identification as a randomised trial in the title                                                                                                                                           | 1                   |
|                                  | 1b      | Structured summary of trial design, methods, results, and conclusions (for specific guidance see CONSORT for abstracts)                                                                     | 1-2                 |
| <b>Introduction</b>              |         |                                                                                                                                                                                             |                     |
| Background and objectives        | 2a      | Scientific background and explanation of rationale                                                                                                                                          | 4-5                 |
|                                  | 2b      | Specific objectives or hypotheses                                                                                                                                                           | 5                   |
| <b>Methods</b>                   |         |                                                                                                                                                                                             |                     |
| Trial design                     | 3a      | Description of trial design (such as parallel, factorial) including allocation ratio                                                                                                        | 5-6                 |
|                                  | 3b      | Important changes to methods after trial commencement (such as eligibility criteria), with reasons                                                                                          | NA                  |
| Participants                     | 4a      | Eligibility criteria for participants                                                                                                                                                       | 5-6                 |
|                                  | 4b      | Settings and locations where the data were collected                                                                                                                                        | 5                   |
| Interventions                    | 5       | The interventions for each group with sufficient details to allow replication, including how and when they were actually administered                                                       | 6-8                 |
| Outcomes                         | 6a      | Completely defined pre-specified primary and secondary outcome measures, including how and when they were assessed                                                                          | 8-9                 |
|                                  | 6b      | Any changes to trial outcomes after the trial commenced, with reasons                                                                                                                       | NA                  |
| Sample size                      | 7a      | How sample size was determined                                                                                                                                                              | 5                   |
|                                  | 7b      | When applicable, explanation of any interim analyses and stopping guidelines                                                                                                                | NA                  |
| <b>Randomisation:</b>            |         |                                                                                                                                                                                             |                     |
| Sequence generation              | 8a      | Method used to generate the random allocation sequence                                                                                                                                      | 6                   |
|                                  | 8b      | Type of randomisation; details of any restriction (such as blocking and block size)                                                                                                         | 6                   |
| Allocation concealment mechanism | 9       | Mechanism used to implement the random allocation sequence (such as sequentially numbered containers), describing any steps taken to conceal the sequence until interventions were assigned | 6                   |
| Implementation                   | 10      | Who generated the random allocation sequence, who enrolled participants, and who assigned participants to interventions                                                                     | 6                   |
| Blinding                         | 11a     | If done, who was blinded after assignment to interventions (for example, participants, care providers, those                                                                                | NA                  |

|    |                          |                                                                                                                     |          |
|----|--------------------------|---------------------------------------------------------------------------------------------------------------------|----------|
| 1  |                          |                                                                                                                     |          |
| 2  |                          | assessing outcomes) and how                                                                                         |          |
| 3  |                          |                                                                                                                     |          |
| 4  |                          | 11b If relevant, description of the similarity of interventions                                                     | 6-7      |
| 5  | Statistical methods      | 12a Statistical methods used to compare groups for primary and secondary outcomes                                   | 8-9      |
| 6  |                          | 12b Methods for additional analyses, such as subgroup analyses and adjusted analyses                                | 8-9      |
| 7  |                          |                                                                                                                     |          |
| 8  | <b>Results</b>           |                                                                                                                     |          |
| 9  | Participant flow (a      | 13a For each group, the numbers of participants who were randomly assigned, received intended treatment, and        | Figure 1 |
| 10 | diagram is strongly      | were analysed for the primary outcome                                                                               |          |
| 11 | recommended)             | 13b For each group, losses and exclusions after randomisation, together with reasons                                | Figure 1 |
| 12 | Recruitment              | 14a Dates defining the periods of recruitment and follow-up                                                         | 5-7      |
| 13 |                          | 14b Why the trial ended or was stopped                                                                              | NA       |
| 14 |                          |                                                                                                                     |          |
| 15 | Baseline data            | 15 A table showing baseline demographic and clinical characteristics for each group                                 | Table 1  |
| 16 | Numbers analysed         | 16 For each group, number of participants (denominator) included in each analysis and whether the analysis was      | 9        |
| 17 |                          | by original assigned groups                                                                                         |          |
| 18 |                          |                                                                                                                     |          |
| 19 | Outcomes and             | 17a For each primary and secondary outcome, results for each group, and the estimated effect size and its           | 9-11     |
| 20 | estimation               | precision (such as 95% confidence interval)                                                                         |          |
| 21 |                          | 17b For binary outcomes, presentation of both absolute and relative effect sizes is recommended                     | NA       |
| 22 | Ancillary analyses       | 18 Results of any other analyses performed, including subgroup analyses and adjusted analyses, distinguishing       | 10-11    |
| 23 |                          | pre-specified from exploratory                                                                                      |          |
| 24 |                          |                                                                                                                     |          |
| 25 | Harms                    | 19 All important harms or unintended effects in each group (for specific guidance see CONSORT for harms)            | None     |
| 26 |                          |                                                                                                                     |          |
| 27 | <b>Discussion</b>        |                                                                                                                     |          |
| 28 | Limitations              | 20 Trial limitations, addressing sources of potential bias, imprecision, and, if relevant, multiplicity of analyses | 11-12    |
| 29 | Generalisability         | 21 Generalisability (external validity, applicability) of the trial findings                                        | 11-12    |
| 30 | Interpretation           | 22 Interpretation consistent with results, balancing benefits and harms, and considering other relevant evidence    | 11-13    |
| 31 |                          |                                                                                                                     |          |
| 32 | <b>Other information</b> |                                                                                                                     |          |
| 33 | Registration             | 23 Registration number and name of trial registry                                                                   | 2        |
| 34 | Protocol                 | 24 Where the full trial protocol can be accessed, if available                                                      | 2        |
| 35 | Funding                  | 25 Sources of funding and other support (such as supply of drugs), role of funders                                  | 13       |
| 36 |                          |                                                                                                                     |          |

\*We strongly recommend reading this statement in conjunction with the CONSORT 2010 Explanation and Elaboration for important clarifications on all the items. If relevant, we also recommend reading CONSORT extensions for cluster randomised trials, non-inferiority and equivalence trials, non-pharmacological treatments, herbal interventions, and pragmatic trials. Additional extensions are forthcoming: for those and for up to date references relevant to this checklist, see [www.consort-statement.org](http://www.consort-statement.org).

# BMJ Open

**Deliberative democracy and cancer screening consent: a randomised control trial of the effect of a community jury on men's knowledge about and intentions to participate in PSA screening.**

|                                 |                                                                                                                                                                                                                                                                                                                                                                                                                                                                                                                                                                     |
|---------------------------------|---------------------------------------------------------------------------------------------------------------------------------------------------------------------------------------------------------------------------------------------------------------------------------------------------------------------------------------------------------------------------------------------------------------------------------------------------------------------------------------------------------------------------------------------------------------------|
| Journal:                        | <i>BMJ Open</i>                                                                                                                                                                                                                                                                                                                                                                                                                                                                                                                                                     |
| Manuscript ID:                  | bmjopen-2014-005691.R1                                                                                                                                                                                                                                                                                                                                                                                                                                                                                                                                              |
| Article Type:                   | Research                                                                                                                                                                                                                                                                                                                                                                                                                                                                                                                                                            |
| Date Submitted by the Author:   | 14-Oct-2014                                                                                                                                                                                                                                                                                                                                                                                                                                                                                                                                                         |
| Complete List of Authors:       | Thomas, Rae; Bond University, Faculty of Health Sciences and Medicine<br>Glasziou, Paul; Bond University, Faculty of Health Sciences and Medicine<br>Rychetnik, Lucie; University of Notre Dame Australia, School of Medicine<br>Sydney; University of Sydney, School of Public Health<br>MacKenzie, Geraldine; Bond university, Faculty of Law<br>Gardiner, Robert; University of Queensland, Centre for Clinical Research &<br>Department of Urology, Royal Brisbane & Women's Hospital<br>Doust, Jenny; Bond University, Faculty of Health Sciences and Medicine |
| <b>Primary Subject Heading</b>: | Public health                                                                                                                                                                                                                                                                                                                                                                                                                                                                                                                                                       |
| Secondary Subject Heading:      | General practice / Family practice, Health policy                                                                                                                                                                                                                                                                                                                                                                                                                                                                                                                   |
| Keywords:                       | Health policy < HEALTH SERVICES ADMINISTRATION & MANAGEMENT, PRIMARY CARE, PUBLIC HEALTH                                                                                                                                                                                                                                                                                                                                                                                                                                                                            |
|                                 |                                                                                                                                                                                                                                                                                                                                                                                                                                                                                                                                                                     |

SCHOLARONE™  
Manuscripts

only

**Title Page**

Deliberative democracy and cancer screening consent: a randomised control trial of the effect of a community jury on men's knowledge about and intentions to participate in PSA screening.

**Authors**

Rae Thomas<sup>1</sup>  
Paul Glasziou<sup>1</sup>  
Lucie Rychetnik<sup>2</sup>  
Geraldine Mackenzie<sup>3</sup>  
Robert Gardiner<sup>4</sup>  
Jenny Doust<sup>1</sup>

<sup>1</sup>Centre for Research in Evidence-Based Practice (CREBP), Faculty of Health Sciences and Medicine, Bond University, Queensland, Australia

<sup>2</sup>School of Medicine, University of Notre Dame, Sydney, NSW, Australia and School of Public Health, University of Sydney, NSW, Australia

<sup>3</sup>Faculty of Law, Bond University, Queensland, Australia

<sup>4</sup>University of Queensland Centre for Clinical Research & Department of Urology, Royal Brisbane & Women's Hospital, Queensland, Australia

Abstract word count: 298

Manuscript word count: 2685

**Corresponding Author:**

Rae Thomas  
Centre for Research in Evidence-Based Practice (CREBP), Faculty of Health Sciences and Medicine, Bond University, Queensland, Australia  
Tel: +617 55955521  
Fax +617 55951271  
Email [rthomas@bond.edu.au](mailto:rthomas@bond.edu.au)

## Abstract

**Objective** Prostate-specific antigen (PSA) screening is controversial. A community jury allows presentation of complex information and may clarify how participants view screening after being well-informed of the benefits and harms. We examined whether participating in a community jury had an effect on men's knowledge about and their intention to participate in PSA screening.

**Design** Random allocation to either a 2-day community jury or control group, with pre- post- and three-month follow-up.

**Setting** Participants from the Gold Coast (Australia) recruited via radio, newspaper, and community meetings.

**Participants** Twenty-six men aged 50-70 years with no previous diagnosis of prostate cancer.

**Intervention** The control group (n= 14) received factsheets on PSA screening. Community jury participants (n= 12) received the same factsheets and further information about screening for prostate cancer. In addition, three experts presented information on PSA screening: a neutral scientific adviser provided background information, one expert emphasised the potential benefits of screening, and another expert emphasised the potential harms.

Participants discussed information, asked questions of the experts and deliberated on personal and policy decisions.

**Main Outcome and Measures** Our primary outcome was change in individual intention to have a PSA screening test. We also assessed knowledge about screening for prostate cancer.

**Results** Analyses were conducted using intention-to-treat. Immediately after the jury, the community jury group had less intention-to-screen for prostate cancer than men in the control group (effect size = -0.6SD,  $p=0.05$ ). This was sustained at three-month follow-up.

1  
2  
3 Community jury men also correctly identified PSA test accuracy and considered themselves  
4  
5 more informed (effect size 1.2SD,  $p < 0.001$ ).  
6

7 **Conclusions** Evidence-informed deliberation of harms and benefits of PSA screening effects  
8  
9 men's individual choice to be screened for prostate cancer. Community juries may be a valid  
10  
11 method for eliciting target group input to policy decisions.  
12  
13

14  
15  
16 **Trial Registration** Australian and New Zealand Clinical Trials Registry  
17  
18 (ACTRN12612001079831)  
19  
20

#### 21 22 23 **Strengths and limitations of this study**

- 24  
25 • This is the first study to use scientific methods to evaluate the effect of a community  
26  
27 jury on an individual's knowledge and decisions.  
28
- 29  
30 • Participants in community juries make value-based decisions from complex  
31  
32 information and can differentiate individual from community choices.  
33
- 34  
35 • Expert presentations were based on large population studies that have limitations.  
36
- 37  
38 • The sample size of this study was small, but the results were clear and sustained.  
39
- 40  
41 • How sampling, recruitment techniques, and group processes affect community jury  
42  
43 outcomes are yet to be examined.  
44  
45  
46  
47  
48  
49  
50  
51  
52  
53  
54  
55  
56  
57  
58  
59  
60

## Introduction

Screening for prostate cancer by prostate-specific antigen (PSA) testing is controversial<sup>1</sup> and the benefits and harms of screening are uncertain.<sup>2</sup> The results of two large randomised controlled trials of population screening (the ERSPC trial in Europe<sup>3</sup> and the PLCO trial in the United States<sup>4</sup>) were much anticipated, but the equivocal results have led to conflicting interpretations and recommendations from expert groups.<sup>5,6</sup> Given the uncertainty, most guidelines recommend that men should be fully informed of the potential advantages and disadvantages of screening prior to having a PSA test.<sup>5,7,8</sup> Although individuals vary in the degree to which they want to engage with the evidence about their health concerns, a majority consistently report an interest in sharing health care decisions with their treating doctor.<sup>9,10</sup> However, providing the complex information relevant to men who are interested in PSA screening remains challenging.

Citizens' deliberation methodologies, such as community juries can facilitate the communication of complex evidence and aim to elicit 'informed' community perspectives for the purpose of guiding services and public policy. A range of community jury processes have been described, but the common features are i) participants are drawn from the lay public; ii) the jury deliberates on a question requiring an ethics or values-based decision (as opposed to a problem requiring a technical solution); iii) the jury is provided with information on the relevant issues and possible positions from expert "witnesses", with the opportunity to ask them questions; and iv) the jury then engages in a deliberation phase with participants discussing their preferences, opinions, values and positions, and attempt to reach a consensus position.<sup>11</sup>

Community juries have been conducted on topics such as public health priorities,<sup>12</sup> mammography screening,<sup>13</sup> and health research.<sup>14,15</sup> A recent review of deliberation methodologies found only four unique studies that compared deliberative methodologies with

1  
2  
3 a control group; only two of these were in relation to health topics.<sup>11</sup> While theoretically  
4  
5 sound,<sup>11</sup> community juries are a resource-intensive process and it is uncertain whether the  
6  
7 views of those participating are better “informed” than those of a public provided with  
8  
9 reading material on the same topic. It is also unclear whether and how being informed  
10  
11 influences a jury’s conclusions. If community juries are to be used to inform screening  
12  
13 policy, it is essential to understand the capacity of a community jury process to support  
14  
15 better-informed conclusions by its participants.  
16  
17

18  
19 The aim of this study was to examine the degree to which participants of a community  
20  
21 jury on PSA screening of asymptomatic men were better “informed” than other citizens and,  
22  
23 based on the ERSPC<sup>3</sup> and PLCO<sup>4</sup> trials together with the general practice guidelines, whether  
24  
25 evidence-informed deliberations of the benefits and harms of PSA screening impact on men’s  
26  
27 intention to be screen for prostate cancer. We conducted a randomised controlled trial that  
28  
29 compared a community jury with men allocated to receive typical information. As part of the  
30  
31 community jury process, men were also asked to deliberate on two community focused  
32  
33 questions:  
34  
35

- 36 • Should government campaigns be provided (on PSA screening) and if so, what  
37 information should be included in those campaigns?
- 38
- 39 • What do you as a group of men think about a government organised invitation  
40  
41 program for testing for prostate cancer?  
42  
43  
44

45 This is the first randomised controlled trial of a deliberative democracy process on the topic  
46  
47 of PSA screening.  
48  
49

## 50 51 52 **Method** 53

54 We recruited men in the target age group of 50 to 70 years from the Gold Coast region  
55  
56 (Australia) who had no previous diagnosis of prostate cancer, using media advertisements,  
57  
58  
59  
60



1  
2  
3 radio interviews, and community groups. Men with a family history of prostate cancer were  
4  
5 not excluded from participating. Eligible and available respondents attended a session on a  
6  
7 Friday evening to receive a full briefing on the study; all agreed to participate and completed  
8  
9 a consent form, before being randomly allocated to either a community jury group or a  
10  
11 control group (Figure 1). Random allocation occurred by each man selecting a piece of paper  
12  
13 with the name of either group from an opaque container. The research project was approved  
14  
15 by the Bond University Human Research Ethics Committee (R01570) and the protocol  
16  
17 registered with the Australian and New Zealand Clinical Trials Registry  
18  
19 (ACTRN12612001079831).  
20  
21  
22

23 All men were given standard PSA fact sheets from the Cancer Council Australia and  
24  
25 Andrology Australia.<sup>16,17</sup> In addition to the factsheets, men in the community jury group also  
26  
27 received a Cochrane Collaboration plain language statement,<sup>2</sup> information from the Royal  
28  
29 Australian College of General Practitioners' Guidelines for "Preventive Activities in General  
30  
31 Practice" pertaining to screening for prostate cancer,<sup>7</sup> and the Executive Summary of "PSA  
32  
33 Testing" from the Urology Society of Australia and New Zealand.<sup>8</sup> Men in both groups  
34  
35 received \$20 gift cards as reimbursement for their time at the introductory session and for  
36  
37 each survey. The community jury group received an \$80 gift card as reimbursement for  
38  
39 attending the community jury weekend. Men in the control group were given a follow-up  
40  
41 survey with a return stamped envelope to be mailed after the weekend.  
42  
43  
44

45 The community jury weekend and a qualitative analysis of the jury deliberations have  
46  
47 been described in detail elsewhere.<sup>18</sup> In brief, the community jury consisted of an iterative  
48  
49 process of education and deliberation. Three experts presented to the community jury on day  
50  
51 one: a neutral scientific advisor discussed medical information regarding the role of the  
52  
53 prostate, screening tests (including PSA and Digital Rectal Examination), explanations about  
54  
55 changes to PSA levels, how cancer is detected, and treatment options and potential outcomes  
56  
57  
58  
59  
60

1  
2  
3 (Jim Dickinson, Professor of Family Medicine, University of Calgary). Two further experts  
4  
5 (a urologist and expert in prostate cancer (author RG) and an expert in evidence-based  
6  
7 medicine (author PG) presented the benefits and harms of being screened for prostate cancer.  
8  
9 Although both speakers aimed to give balanced presentations, one emphasised the benefits of  
10  
11 PSA screening, in particular selective screening, (RG <http://youtu.be/9vPt3NACG8g>) and the  
12  
13 other the harms (PG <http://youtu.be/nifkjdZKmsU>). Both presentations focused on the  
14  
15 evidence from the two trials of PSA population screening. However, both presenters also  
16  
17 made reference to lower levels of evidence relating to the risks of metastases if a cancer  
18  
19 remains undetected due to a lack of screening and the consequences of treating localised  
20  
21 disease detected during screening. After each presentation, men were able to deliberate on the  
22  
23 information and could ask the experts any questions. The men reflected on the information  
24  
25 overnight and returned on Sunday to deliberate and discuss the information presented the day  
26  
27 before, including asking any further questions of the expert witnesses by phone.  
28  
29  
30  
31

32 A nominal group technique was used on both days to elicit individual thoughts prior to  
33  
34 group deliberations. After the final deliberations on Sunday, including the community level  
35  
36 decisions, the men in the community jury completed the post-assessment survey. Men in the  
37  
38 control group were contacted on the Monday and either completed the post-assessment  
39  
40 survey by phone or mailed the survey back to researchers the same week. Three months after  
41  
42 the community jury weekend, all men in both groups were re-contacted and completed a  
43  
44 follow-up survey.  
45  
46

### 47 **Non-protocol Extension**

48  
49 Because they indicated a strong desire to have the experience of the community jury  
50  
51 weekend, after their three-month follow-up survey the control group was offered the same  
52  
53 community jury experience. Six of the 14 men randomised to the control group participated  
54  
55 in the second community jury (Figure 1). The two primary experts were the same as for the  
56  
57  
58  
59  
60

1  
2  
3 original community jury group, however, the scientific advisor was changed to a female  
4  
5 general practitioner and professor of clinical epidemiology (author JD). A final post-jury  
6  
7 survey was conducted with the second community jury.  
8

### 9 10 **Measures**

11  
12 We collected demographic information, history of previous PSA testing and  
13  
14 information sources for PSA screening at the introductory session. In each of the three  
15  
16 surveys, men were asked to nominate on a scale 0 to 10 (0 = *not at all*, 5 = *maybe*, and 10 =  
17  
18 *absolutely*), whether they intended, while symptomless, to undergo PSA screening for  
19  
20 prostate cancer in the future. They were also asked to nominate how informed they  
21  
22 considered themselves in relation to the harms and benefits of screening for prostate cancer  
23  
24 on a scale 0 to 4 (0 = *not at all* and 4 = *very*). We asked four knowledge questions in each  
25  
26 survey that assessed a) the men's knowledge about the recommendation on PSA screening in  
27  
28 the Australian general practice guidelines,<sup>7</sup> b) the accuracy of the PSA test and c) two  
29  
30 questions about treatment options and side-effects of prostate cancer treatment (Box 1).  
31  
32 Australia has a primary care based system, requiring a referral from a general practitioner to  
33  
34 see a urologist. General practitioners are therefore responsible for the majority of the PSA  
35  
36 screening tests requested in Australia. For this reason, we were interested in the participants'  
37  
38 knowledge of current general practice guidelines.  
39  
40  
41  
42

### 43 **Statistical Analyses**

44  
45 Pre- to post-, and post- to follow-up assessment differences between the groups were  
46  
47 examined with ANCOVA and Fisher's exact test. It was anticipated that the number of PSA  
48  
49 tests previously undertaken would impact on a man's future decision to be screened for  
50  
51 prostate cancer with the PSA test.<sup>19</sup> Therefore we conducted the analyses with adjustment for  
52  
53 baseline intention-to-screen and the number of times a man had already received a PSA test.  
54  
55  
56  
57  
58  
59  
60

1  
2  
3 Unadjusted post-assessment analyses were conducted using an independent t-test. All  
4  
5 analyses were conducted on an intention-to-treat basis.  
6  
7  
8

## 9 10 **Results**

### 11 **Participant Demographics**

12  
13  
14 Of the 59 men who contacted the research team, 27 respondents were available on the set  
15  
16 date and elected to participate in the study. One man was excluded post-randomisation as his  
17  
18 age exceeded the limit of the study (see Figure 1). Participating men's ages ranged between  
19  
20 53 and 70 years (average 62 years,  $SD = 4.8$ ). Further demographic information is described  
21  
22 in Table 1. There was no loss to follow up during the course of the study. The groups were  
23  
24 similar at baseline in age, number of times previously screened for prostate cancer, and  
25  
26 whether they intended to be screened for prostate cancer in the future. All but 3 men had  
27  
28 previously had a PSA test; 14 had been tested 2 or 3 times, 4 on one occasion, two 6 times,  
29  
30 and 3 men had been tested on 7, 8, and 12 occasions each. No men had undergone a biopsy.  
31  
32 At pre-assessment, the majority of men (16/26, 62%) agreed with the statement that routine  
33  
34 screening for prostate cancer saved lives, whereas 4 (15%) disagreed and 6 (23%) did not  
35  
36 know (Table 1). The men reported a variety of sources for how they accessed information  
37  
38 about prostate cancer screening, with the most common source of information being their  
39  
40 general practitioner (Table 2).  
41  
42  
43  
44

### 45 **Changes in Intention-to-Screen and Individual Knowledge**

46  
47 **Pre-to post-intervention.** At post-assessment, men in the community jury group had  
48  
49 significantly less intention-to-screen for prostate cancer on the 0 to 10 scale than men in the  
50  
51 control group (median score 2.5 and 7.0, Effect Size=  $-0.6SD$ ,  $p=0.05$ ). When we adjusted  
52  
53 for baseline intention to be screened for prostate cancer and the number of prior PSA tests,  
54  
55  
56  
57  
58  
59  
60

1  
2  
3 the mean difference was 3.7 ( $p=.005$ , Table 3). The unadjusted mean difference between the  
4  
5 groups was 2.7 (Figure 2).  
6

7 After completion of the community jury weekend, men in the jury group considered  
8 themselves more informed about screening for prostate cancer than the control group (median  
9 score 4.0 and 2.0, mean difference = 1.7, Effect Size=1.2SD,  $p<0.001$ ). Compared with the  
10 control group, the community jury group was more likely to correctly identify that the PSA  
11 test was not always accurate in indicating the likelihood of prostate cancer as it had both false  
12 positive and false negative results ( $p=0.03$ , Table 4).  
13  
14  
15  
16  
17  
18  
19

20 **Post-to 3 month follow-up assessment.** The influence of the community jury  
21 experience was sustained at 3 months: men in the community jury group maintained their  
22 intention-to-screen score at 3 months (Figure 2) whereas there was a slight increase in the  
23 control group's future intention-to-screen for prostate cancer. There was no further change in  
24 knowledge (Table 5).  
25  
26  
27  
28  
29  
30

### 31 **Community Level Questions**

32 Men in the community jury voted unanimously (12/12) against a government campaign  
33 targeting the public about PSA screening for prostate cancer, and against a government  
34 organised invitation program. Unprompted, the jury members instead suggested the  
35 government provide a campaign that targeted general practitioners to assist them to provide  
36 better quality and more consistent information to their patients on the benefits and harms of  
37 screening for prostate cancer using the PSA test.<sup>18</sup>  
38  
39  
40  
41  
42  
43  
44  
45  
46

47 **Non-protocol Extension.** Compared with their 3-month follow-up scores, the men  
48 from the control group who completed the second community jury also subsequently  
49 increased their self-report score of how informed they considered themselves (mean score  
50 increased from 2.2 to 3.7), and decreased their future intention to be screened for prostate  
51 cancer (mean score decreased from 8 to 2.8).  
52  
53  
54  
55  
56  
57  
58  
59  
60

## Discussion

1  
2  
3  
4  
5 Compared with men who received standard information, participants in a 2-day  
6  
7 community jury considered themselves better informed about the benefits and harms of PSA  
8  
9 screening and reduced their stated intention to participate in screening in the future. Although  
10  
11 the process led to some men changing their minds about participating in PSA screening,  
12  
13 others said they would continue to be tested; highlighting the individual nature of this  
14  
15 decision and the need for informed consent.<sup>20</sup>  
16  
17

18  
19 Yet despite differences in the men's individual intentions to be screened for prostate  
20  
21 cancer, the group was unanimous in opposing any government-sponsored community  
22  
23 campaign. Our findings demonstrate the capacity of a community jury to consider complex  
24  
25 information on the harms and benefits of screening, and to distinguish individual from  
26  
27 community choices. This echoes the findings of a New Zealand community jury on  
28  
29 mammography screening<sup>13</sup> which also indicated that community juries are able to  
30  
31 differentiate between individual and public health needs.  
32  
33

34  
35 All deliberative democracy methods rely on engagement of those who have an interest  
36  
37 in the topic and agree to take part. The generalisability of our study findings may be limited  
38  
39 by the uncertain representativeness of a jury of volunteers from the Gold Coast, Australia,  
40  
41 who may be different in several ways to men in the wider Australian community. For  
42  
43 example, 88% of our participants had already had at least one PSA test, implying that prior to  
44  
45 the community jury they were more likely to be favorably disposed to PSA screening.  
46  
47

48  
49 The authors considered PSA screening an appropriate topic for engaging middle-aged  
50  
51 men because the data are equivocal and guidelines differ.<sup>2,7,8</sup> However, we also acknowledge  
52  
53 the limitations of these mass population studies. Neither the ERSPC<sup>3</sup> nor PLCO<sup>4</sup> trials has a  
54  
55 median follow-up long enough to reliably address prostate cancer mortality and their  
56  
57 respective methodologies have been criticised.<sup>21</sup> This limitation may have impacted the  
58  
59  
60

1  
2  
3 community jury decision. Nevertheless, this pilot study does illustrate the potential of the  
4  
5 community jury approach to instruct a cross section of men of different ages, with different  
6  
7 backgrounds, and educational levels.  
8

9  
10 Whether and how sampling and recruitment techniques affect community jury  
11  
12 outcomes are important research questions yet to be examined. Other important  
13  
14 methodological questions for community research include: what are the impacts on group  
15  
16 decisions of normative (conformity to group thinking) or informational (discussion of facts)  
17  
18 influences?<sup>22</sup> and when and how in the deliberation process do community jury participants  
19  
20 form their conclusions?  
21  
22

23 Our results have implications for clinical and public health practice. A large proportion  
24  
25 of men have not been engaged in an evidence-informed discussion of the potential benefits  
26  
27 and harms of screening prior to their physician ordering a PSA test<sup>23, 24</sup>; have not been asked  
28  
29 about their screening preferences prior to a PSA screening test<sup>25</sup>; and some doctors screen  
30  
31 without a discussion.<sup>26</sup> Alarming, a study conducted in the theatre waiting room in men  
32  
33 waiting to undergo a trans rectal ultrasound and prostate biopsy found 8% were unaware their  
34  
35 primary care provider had conducted a PSA screening test.<sup>27</sup> Current practice of PSA  
36  
37 screening in asymptomatic men is not standardised. Our findings reinforce the importance of  
38  
39 presenting the potential benefits and harms of PSA testing to men interested in being  
40  
41 screened, primarily because such information will lead some men to change their mind once  
42  
43 fully informed. When practitioners are faced with the difficult situation of being asked to  
44  
45 determine such a decision on behalf of their patient, in addition to considering their  
46  
47 individual patient's history, concerns, and priorities, it may be valuable to also have available  
48  
49 information about community attitudes and concerns regarding screening.<sup>20</sup>  
50  
51  
52  
53  
54  
55  
56  
57  
58  
59  
60

1  
2  
3 **Contributors** RT led the preparations and revisions of the manuscript, had full access to all  
4 of the data in the study and takes responsibility for the accuracy of the data analyses. PG and  
5  
6  
7 JD led the conception and design of the study, contributed to the interpretation of the data,  
8  
9 and made substantial revisions to the manuscript. LR contributed to the study design and  
10  
11 made substantial revisions to the manuscript. GM and RG contributed to the study design,  
12  
13 interpretation of data and made significant revisions to the manuscript.  
14

15  
16 We thank Jim Dickinson PhD FRACGP, Professor of Family Medicine, University of  
17  
18 Calgary, Canada for kindly providing his scientific expertise as our scientific advisor in the  
19  
20 community jury. He did not receive compensation for his contribution. We also thank Sir Iain  
21  
22 Chalmers DSc, James Lind Initiative, Oxford, UK for his helpful comments on an earlier  
23  
24 draft.  
25

26  
27 **Funding Support** This work was supported by a Bond University Vice Chancellor's  
28  
29 Research Grant Scheme, an Australian National Health and Medical Research Council  
30  
31 (NHMRC) Project Grant (#1023791), and a NHMRC Screening and Test Evaluation  
32  
33 Program (STEP) grant (#633033).  
34

35  
36 **Competing Interests** All authors have completed the ICMJE uniform disclosure form and  
37  
38 declare: RT, JD, PG, and GM received funding support from Bond University; RT, JD and  
39  
40 PG also received funding support from a NHMRC Program grant (#633033); LR received  
41  
42 funding support from a NHMRC funding grant (#1023197); no other relationships or  
43  
44 activities that could appear to have influenced the submitted work.  
45

46  
47 **Ethics Approval** The research project was approved by the Bond University Human  
48  
49 Research Ethics Committee (RO1570).  
50

51  
52 **Data Sharing Statement** In addition to the quantitative analysis reported in this paper, a  
53  
54 qualitative analysis of the jury deliberations and recommendations was conducted and  
55



1  
2  
3 reported elsewhere and cited as reference 18. Additional data is available by emailing the first  
4  
5 author.  
6  
7  
8

### 9 10 **Figure Legends**

11  
12 Figure 1. Consort Flow-Chart of Participants (no legend)

13  
14 Figure 2. Future Intention-to-Screen Scores at Pre, Post, and Three Month Follow-up

15  
16 ○ — Community Jury Group;

17  
18 △ — Control Group  
19

20  
21 Foot note for Figure 2

22 Note: CJ=Community Jury group; M = mean score; p values based on ANCOVA analyses  
23 pre to post and pre to 3 month follow-up.  
24  
25  
26  
27  
28  
29  
30  
31  
32  
33  
34  
35  
36  
37  
38  
39  
40  
41  
42  
43  
44  
45  
46  
47  
48  
49  
50  
51  
52  
53  
54  
55  
56  
57  
58  
59  
60

## References

1. Katz MH. Can we stop ordering prostate-specific antigen screening tests? *JAMA Intern Med* 2013;173(10): 847-8.
2. Ilic D, Neuberger MM, Djulbegovic M, Dahm P. Screening for prostate cancer. The Cochrane Database of Syst Rev 2013;Issue 1. Art No.:CD004720. doi: 10.1002/14651858.CD004720.pub3.
3. Schröder FH, Hugosson J, Roobol MJ, Tammela TLJ, Ciatto S, Nelen V, et al. Prostate-Cancer Mortality at 11 Years of Follow-up. *N Engl J Med* 2012;366(11):981-90.
4. Andriole GL, Crawford ED, Grubb RL, 3rd, Buys SS, Chia D, Church TR, et al. Prostate cancer screening in the randomized Prostate, Lung, Colorectal, and Ovarian Cancer Screening Trial: mortality results after 13 years of follow-up. *J Natl Cancer Inst* 2012;104(2):125-32.
5. Moyer VA. Screening for Prostate Cancer: U.S. Preventive Services Task Force Recommendation Statement. *Ann Intern Med* 2012;157(2):120-34.
6. Carter HB, Albertsen PC, Barry MJ, Etzioni R, Freedland SJ, Greene KL, et al. Early detection of prostate cancer: AUA Guideline. *J Urol* 2013;190(2):419-26. doi:10.1016/j.juro.2013.04.119
7. Guidelines for preventive activities in general practice, 8th edn. East Melbourne: Royal Australian College of General Practitioners, 2012.
8. Urology Society of Australia and New Zealand PSA testing policy accessed April 2013 from [http://www.usanz.org.au/uploads/29168/ufiles/USANZ\\_2009\\_PSA\\_Testing\\_Policy\\_Final.pdf](http://www.usanz.org.au/uploads/29168/ufiles/USANZ_2009_PSA_Testing_Policy_Final.pdf).
9. Benbassat J, Pilpel D, Tidhar, M. Patients' preferences for participation in clinical decision making: A review of published studies. *Behav Med* 1998;2:81-88. doi: 10.1080/08964289809596384
10. Deber RB, Kraetschmer N, Urowitz S, Sharpe N. Do people want to be autonomous patients? Preferred roles in treatment decision-making in several patient populations. *Health Expect* 2007;10:248-258. doi: 10.1111/j.1369-7625.2007.00441.x
11. Carman KL, Heeringa JW, Heil SKR, Garfinkel S, Windham A, Gilmore D, Ginsburg M, Sofaer S, Gold M, Pathak-Sen E. The Use of Public Deliberation in Eliciting Public Input: Findings from a Literature Review. (Prepared by the American Institutes for Research Under Contract No. 290-02-0009.) AHRQ Publication No. 13-EHC070-EF. Rockville, MD: Agency for Healthcare Research and Quality; February 2013

- 1  
2  
3  
4  
5  
6  
7  
8  
9  
10  
11  
12  
13  
14  
15  
16  
17  
18  
19  
20  
21  
22  
23  
24  
25  
26  
27  
28  
29  
30  
31  
32  
33  
34  
35  
36  
37  
38  
39  
40  
41  
42  
43  
44  
45  
46  
47  
48  
49  
50  
51  
52  
53  
54  
55  
56  
57  
58  
59  
60
12. Abelson J, Eyles J, McLeod CB, Collins P, McMullan C, Forest PG. Does deliberation make a difference? Results from a citizens panel study of health goals priority setting. *Health Policy* 2003;66(1):95-106.
  13. Paul C, Nicholls R, Priest P, McGee R. Making policy decisions about population screening for breast cancer: The role of citizens' deliberation. *Health Policy* 2008;85(3):314-20.
  14. De Vries R, Stanczyk A, Wall IF, Uhlmann R, Damschroder LJ, Kim SY. Assessing the quality of democratic deliberation: A case study of public deliberation on the ethics of surrogate consent for research. *Soc Sci Med* 2010;70:1896-1903.  
doi:10.1016/j.socscimed.2010.02.031
  15. Parkin L, Paul C. Public good, personal privacy: a citizens' deliberation about using medical information for pharmacoepidemiological research. *J Epidemiol Community Health* 2011;65:150-156.doi:10.1136/jech.2009.097436
  16. Australian Cancer Council Factsheet: Early Detection of Prostate Cancer Accessed April 2013 from [http://www.cancer.org.au/content/pdf/Factsheets/Early\\_Detection\\_prostate-cancer-2013-revised.pdf](http://www.cancer.org.au/content/pdf/Factsheets/Early_Detection_prostate-cancer-2013-revised.pdf)
  17. Andrology Australia Factsheet: PSA testing Accessed April 2013 from [https://www.andrologyaustralia.org/wp-content/uploads/Factsheet\\_PSA-Test.pdf](https://www.andrologyaustralia.org/wp-content/uploads/Factsheet_PSA-Test.pdf)
  18. Rychetnik L, Doust J, Thomas R, Gardiner R, MacKenzie G, Glasziou P. A community jury on PSA screening: What do well-informed men want the government to do about prostate cancer screening? *BMJ Open* 2014;4:e004682. doi:10.1136/bmjopen-2013-004682
  19. Staw BM. The escalation of commitment to a course of action. *Academy of Management* 1981;6(4):577-87.
  20. Irwig L, Glasziou P. Informed consent for screening by community sampling. *Eff Clin Pract* 2000; 3(1):47-50.
  21. National Health and Medical Research Council (2013). *Prostate-Specific Antigen (PSA) testing in asymptomatic men: Evidence Evaluation Report*. Canberra: National Health and Medical Research Council.
  22. Kaplan MF, Miller CE. Group decision making and normative versus informational influence: Effects of type of issue and assigned decision rule. *J Personality and Social Psychology* 1987;53(2):306-13.

- 1  
2  
3 23. Chan ECY, Vernon SW, Ahn C, Greisinger A. Do men know that they have had a  
4 prostate specific antigen test? Accuracy of self-reports of testing at 2 sites *Am J Public*  
5 *Health* 2004;94(8):1336-8.  
6  
7  
8 24. Guerra CE, Jacobs SE, Holmes JH, Shea JA. Are physicians discussing prostate cancer  
9 screening with their patients and why or why not? A pilot study. *J Gen Intern Med*  
10 2007;22(7):901-7.  
11  
12 25. Hoffman RM, Couper MP, Zikmund-Fisher BJ, Levin CA, McNaughton-Collins M,  
13 Helitzer DL, VanHoewyk J, Barry MJ. Prostate cancer screening decisions. Results from  
14 the National Survey of Medical Decisions (DECISIONS Study). *Arch Intern Med*  
15 2009;169(17):1611-1618.  
16  
17  
18 26. Volk RJ, Linder SK, Kallen MA, Galliher JM, Spano MS, Mullen PD, Spann SJ.  
19 Primary care physicians' use of an informed decision-making process for prostate cancer  
20 screening. *Ann Fam Med* 2013;1:67-74.  
21  
22  
23 27. Pan D, McCahy P. Patient knowledge about prostate-specific antigen (PSA) and prostate  
24 cancer in Australia. *BJU Int* 2012; Sup 3:52-56  
25  
26  
27  
28  
29  
30  
31  
32  
33  
34  
35  
36  
37  
38  
39  
40  
41  
42  
43  
44  
45  
46  
47  
48  
49  
50  
51  
52  
53  
54  
55  
56  
57  
58  
59  
60

**Box 1.****Knowledge Questions from Surveys (answers considered correct highlighted)**

1. Is routine testing for prostate cancer recommended by RACGP Guidelines?

- Yes       No       Don't know

2. How accurate do *you* think the prostate specific antigen (PSA) blood test is for diagnosing prostate cancer?

- Reasonably accurate but some people *who do* have cancer can have a negative test result (false negative)

- Reasonably accurate but some people *who do not* have cancer can have an abnormal result (false positive)

- The PSA test is not always accurate because it can have both false positive or false negative results

- The PSA test is completely accurate

- Don't know

3. In terms of your knowledge about Prostate cancer, could you list some treatment options?

- No       Yes, please list

4. Could you list some potential side effects of treatments for prostate cancer?

- No       Yes, please list
-

**Table 1. Participants Demographics**

|                                                                                |                     | Community<br>Jury<br>(n=12) | (SD/%) | Control<br>(n=14) | SD/%  |
|--------------------------------------------------------------------------------|---------------------|-----------------------------|--------|-------------------|-------|
| <i>Age</i>                                                                     |                     |                             |        |                   |       |
|                                                                                | Mean                | 61                          | (4.8)  | 62                | (4.9) |
| <i>Number previous PSA tests</i>                                               |                     |                             |        |                   |       |
|                                                                                | Mean                | 3.9                         | (3.6)  | 2.2*              | (1.8) |
| <i>Routine PSA testing saves lives</i>                                         |                     |                             |        |                   |       |
| Frequency                                                                      | yes                 | 7                           | (58%)  | 9                 | (64%) |
|                                                                                | no                  | 2                           | (17%)  | 2                 | (14%) |
|                                                                                | don't know          | 3                           | (25%)  | 3                 | (21%) |
| <i>Education</i>                                                               |                     |                             |        |                   |       |
| Frequency                                                                      | High school or less | 2                           | (17%)  | 4                 | (28%) |
|                                                                                | some uni or TAFE    | 4                           | (33%)  | 4                 | (28%) |
|                                                                                | uni/TAFE graduate   | 4                           | (33%)  | 1                 | (7%)  |
|                                                                                | uni postgrad        | 2                           | (17%)  | 5                 | (36%) |
| Note. * n=13, (1 missing); TAFE = Technical and Further Education Institutions |                     |                             |        |                   |       |

**Table 2. Where do Men Receive Information about Testing for Prostate Cancer? (N=26)**

|                                              | Agree | (%)  |
|----------------------------------------------|-------|------|
| I don't look for information                 | 3     | (12) |
| Family and friends                           | 11    | (42) |
| Internet                                     | 10    | (38) |
| Media                                        | 9     | (35) |
| General practitioner                         | 17    | (65) |
| Urologist/specialist/hospital                | 5     | (20) |
| Note: men could endorse more than one source |       |      |

**Table 3. Linear Regression Analysis Predicting Future Intention-to-Screen for Prostate Cancer**

|                                          | <i>Coefficient</i> | <i>SE B</i> | CI<br>Lower | CI<br>Upper | <i>p</i> |
|------------------------------------------|--------------------|-------------|-------------|-------------|----------|
| Constant                                 | -0.16              | 1.69        | -3.66       | 3.35        | 0.93     |
| Pre-assessment intention-to-screen score | 0.74               | 0.18        | 0.36        | 1.11        | 0.001    |
| Number of previous PSA tests             | 0.63               | 0.22        | 0.18        | 1.07        | 0.008    |
| Group (Community Jury/Control)           | -3.69              | 1.19        | -6.16       | -1.21       | 0.005    |

Note. N=25; CI= confidence interval;  
These data are slightly different to Rychetnik et al (2014) analyses as they are based on intention-to-treat.

**Table 4. Changes in Men's Knowledge Scores from Pre-to Post-assessment**

|                                          |                | Wrong to Right |      | Right to Right |      | Right to Wrong |     | Wrong to Wrong |      | <i>p</i> |
|------------------------------------------|----------------|----------------|------|----------------|------|----------------|-----|----------------|------|----------|
|                                          |                | n              | (%)  | n              | (%)  | n              | (%) | n              | (%)  |          |
| Recommended by guidelines?               | community jury | 4              | (42) | 3              | (25) | 1              | (8) | 3              | (25) | 0.08     |
|                                          | control*       | 1              | (8)  | 1              | (8)  | 1              | (8) | 10             | (77) |          |
| how accurate is the PSA test?            | community jury | 6              | (50) | 4              | (33) | 1              | (8) | 1              | (8)  | 0.03     |
|                                          | control        | 2              | (14) | 9              | (64) | 0              | (0) | 3              | (21) |          |
| list possible treatment options          | community jury | 2              | (17) | 7              | (58) | 0              | (0) | 2              | (17) | 0.6      |
|                                          | control        | 3              | (21) | 7              | (50) | 0              | (0) | 4              | (27) |          |
| list possible side effects of treatments | community jury | 3              | (25) | 7              | (58) | 0              | (0) | 2              | (17) | 0.6      |
|                                          | control        | 3              | (21) | 7              | (50) | 0              | (0) | 4              | (27) |          |

Note: \*n=13 (1 missing)

**Table 5. Changes in Men's Knowledge Scores Post- to Follow-up Assessment**

|                               |                | Wrong to Right |      | Right to Right |      | Right to Wrong |      | Wrong to Wrong |      | <i>p</i> |
|-------------------------------|----------------|----------------|------|----------------|------|----------------|------|----------------|------|----------|
|                               |                | n              | (%)  | n              | (%)  | n              | (%)  | n              | (%)  |          |
| Recommended by guidelines?    | community jury | 0              | (0)  | 7              | (58) | 1              | (8)  | 4              | (33) | 0.7      |
|                               | control*       | 0              | (0)  | 1              | (7)  | 1              | (7)  | 11             | (85) |          |
| how accurate is the PSA test? | community jury | 0              | (0)  | 10             | (83) | 0              | (0)  | 2              | (17) | 0.1      |
|                               | control        | 2              | (14) | 9              | (64) | 2              | (14) | 1              | (7)  |          |

Note: \*n=13 (1 missing)



## A Community Jury and PSA Screening 1

## Title Page

Deliberative democracy and cancer screening consent: a randomised control trial of the effect of a community jury on men's knowledge about and intentions to participate in PSA screening.

## Authors

Rae Thomas<sup>1</sup>  
Paul Glasziou<sup>1</sup>  
Lucie Rychetnik<sup>2</sup>  
Geraldine Mackenzie<sup>3</sup>  
Robert Gardiner<sup>4</sup>  
Jenny Doust<sup>1</sup>

<sup>1</sup>Centre for Research in Evidence-Based Practice (CREBP), Faculty of Health Sciences and Medicine, Bond University, Queensland, Australia

<sup>2</sup>School of Medicine, University of Notre Dame, Sydney, NSW, Australia and School of Public Health, University of Sydney, NSW, Australia

<sup>3</sup>Faculty of Law, Bond University, Queensland, Australia

<sup>4</sup>University of Queensland Centre for Clinical Research & Department of Urology, Royal Brisbane & Women's Hospital, Queensland, Australia

Abstract word count: ~~298~~

Manuscript word count: ~~2808~~2685

## Corresponding Author:

Rae Thomas  
Centre for Research in Evidence-Based Practice (CREBP), Faculty of Health Sciences and Medicine, Bond University, Queensland, Australia  
Tel: +617 55955521  
Fax +617 55951271  
Email [rthomas@bond.edu.au](mailto:rthomas@bond.edu.au)

## A Community Jury and PSA Screening 2

**Abstract**

**Objective** Prostate-specific antigen (PSA) screening is controversial. A community jury allows presentation of complex information and may clarify how participants view screening after being well-informed of the benefits and harms. We sought to determine whether participating in a community jury had an effect on men's knowledge about and their intention to participate in PSA screening.

**Design** Participants were randomly allocated to either a 2-day community jury or a control group, with pre- post- and three-month follow-up.

**Setting** Community members from the Gold Coast (Australia) were recruited via radio, newspaper, and community meetings.

**Participants** Twenty-six eligible men aged 50-70 years with no previous diagnosis of prostate cancer.

**Intervention** The control group (n= 14) received factsheets on PSA screening. Community jury participants (n= 12) received the same factsheets and further information about screening for prostate cancer. In addition, three experts presented information on PSA screening: a neutral scientific adviser provided background information, one expert emphasised the potential benefits of screening, and another expert emphasised the potential harms.

Participants discussed this information, asked questions of the experts and deliberated on personal and policy decisions.

**Main Outcome and Measures** Our primary outcome was change in individual intention to have a PSA screening test. We also assessed knowledge about screening for prostate cancer.

**Results** All analyses were conducted using intention-to-treat. Immediately after the jury, the community jury group had less intention-to-screen for prostate cancer than men in the control group (effect size = -0.6SD,  $p=0.05$ ). This was sustained at three-month follow-up.

## A Community Jury and PSA Screening 3

Community jury men also ~~correctly identified PSA test accuracy~~ ~~answered more knowledge questions correctly~~ and considered themselves more informed (effect size 1.2SD,  $p < 0.001$ ).

**Conclusions** Evidence-informed deliberation of the harms and benefits of PSA screening effects men's individual choice to be screened for prostate cancer. Community juries may be a valid method for eliciting target group input to policy decisions.

**Trial Registration** Australian and New Zealand Clinical Trials Registry

(ACTRN12612001079831) <http://www.anzctr.org.au>

**Strengths and limitations of this study**

- This is the first study to use scientific methods to evaluate the effect of a community jury on an individual's knowledge and decisions.
- Participants in community juries make value-based decisions from complex information and can differentiate individual from community choices.
- Expert presentations were based on large population studies that have limitations.
- The sample size of this study was small, but the results were clear and sustained.
- How sampling, recruitment techniques, and group processes affect community jury outcomes are yet to be examined.

## A Community Jury and PSA Screening 4

**Introduction**

Screening for prostate cancer by prostate-specific antigen (PSA) testing is controversial<sup>1</sup> and the benefits and harms of screening are uncertain.<sup>2</sup> The results of two large randomised controlled trials of population screening (the ERSPC trial in Europe<sup>3</sup> and the PLCO trial in the United States<sup>4</sup>) were much anticipated, but the equivocal results have led to conflicting interpretations and recommendations from expert groups.<sup>5,6</sup> Given the uncertainty, most guidelines recommend that men should be fully informed of the potential advantages and disadvantages of screening prior to having a PSA test.<sup>5,7,8</sup> Although individuals vary in the degree to which they want to engage with the evidence about their health concerns, a majority consistently report an interest in sharing health care decisions with their treating doctor.<sup>9,10</sup> However, providing the complex information relevant to men who are interested in PSA screening remains challenging.

Citizens' deliberation methodologies, such as community juries can facilitate the communication of complex evidence and aim to elicit 'informed' community perspectives for the purpose of guiding services and public policy. A range of community jury processes have been described, but the common features are i) participants are drawn from the lay public; ii) the jury deliberates on a question requiring an ethics or values-based decision (as opposed to a problem requiring a technical solution); iii) the jury is provided with information on the relevant issues and possible positions from expert "witnesses", with the opportunity to ask them questions; and iv) the jury then engages in a deliberation phase with participants discussing their preferences, opinions, values and positions, and attempt to reach a consensus position.<sup>11</sup>

Community juries have been conducted on topics such as public health priorities,<sup>12</sup> mammography screening,<sup>13</sup> and health research.<sup>14,15</sup> A recent review of deliberation methodologies found only four unique studies that compared deliberative methodologies with

## A Community Jury and PSA Screening 5

1  
2  
3  
4  
5  
6  
7 a control group; only two of these were in relation to health topics.<sup>11</sup> While theoretically  
8 sound,<sup>11</sup> community juries are a resource-intensive process and it is uncertain whether the  
9 views of those participating are better “informed” than those of a public provided with  
10 reading material on the same topic. It is also unclear whether and how being informed  
11 influences a jury’s conclusions. If community juries are to be used to inform screening  
12 policy, it is essential to understand the capacity of a community jury process to support  
13 better-informed conclusions by its participants.  
14  
15  
16  
17  
18  
19

20 The aim of this study was to examine the degree to which participants of a community  
21 jury on PSA screening of asymptomatic men were better “informed” than other citizens and,  
22 based on the ERSPC<sup>3</sup> and PLCO<sup>4</sup> trials together with the general practice guidelines, whether  
23 evidence-informed deliberations of the benefits and harms of PSA screening impact on men’s  
24 intention to be screen for prostate cancer. We conducted a randomised controlled trial that  
25 compared a community jury with men allocated to receive typical information. As part of the  
26 community jury process, men were also asked to deliberate on two community focused  
27 questions:  
28  
29  
30  
31  
32  
33  
34

- 35 • Should government campaigns be provided (on PSA screening) and if so, what  
36 information should be included in those campaigns?  
37
- 38 • What do you as a group of men think about a government organised invitation  
39 program for testing for prostate cancer?  
40  
41  
42

43 This is the first randomised controlled trial of a deliberative democracy process on the topic  
44 of PSA screening.  
45  
46  
47

### 48 Method

49 We recruited men in the target age group of 50 to 70 years from the Gold Coast region  
50 (Australia) who had no previous diagnosis of prostate cancer, using media advertisements,  
51  
52  
53  
54  
55  
56  
57  
58  
59  
60

## A Community Jury and PSA Screening 6

1  
2  
3  
4  
5  
6  
7 radio interviews, and community groups. Men with a family history of prostate cancer were  
8  
9 not excluded from participating. Eligible and available respondents attended a session on a  
10  
11 Friday evening to receive a full briefing on the study; all agreed to participate and completed  
12  
13 a consent form, before being randomly allocated to either a community jury group or a  
14  
15 control group (Figure 1). Random allocation occurred by each man selecting a piece of paper  
16  
17 with the name of either group from an opaque container. The research project was approved  
18  
19 by the Bond University Human Research Ethics Committee (R01570) and the protocol  
20  
21 registered with the Australian and New Zealand Clinical Trials Registry  
22  
23 (ACTRN12612001079831).

24  
25 All men were given standard PSA fact sheets from the Cancer Council Australia and  
26  
27 Andrology Australia.<sup>16,17</sup> In addition to the factsheets, men in the community jury group also  
28  
29 received a Cochrane Collaboration plain language statement,<sup>2</sup> information from the Royal  
30  
31 Australian College of General Practitioners' Guidelines for "Preventive Activities in General  
32  
33 Practice" pertaining to screening for prostate cancer,<sup>7</sup> and the Executive Summary of "PSA  
34  
35 Testing" from the Urology Society of Australia and New Zealand.<sup>8</sup> Men in both groups  
36  
37 received \$20 gift cards as reimbursement for their time at the introductory session and for  
38  
39 each survey. The community jury group received an \$80 gift card as reimbursement for  
40  
41 attending the community jury weekend. Men in the control group were given a follow-up  
42  
43 survey with a return stamped envelope to be mailed after the weekend.

44  
45 The community jury weekend and a qualitative analysis of the jury deliberations have  
46  
47 been described in detail elsewhere.<sup>18</sup> In brief, the community jury consisted of an iterative  
48  
49 process of education and deliberation. Three experts presented to the community jury on day  
50  
51 one: a neutral scientific advisor discussed medical information regarding the role of the  
52  
53 prostate, screening tests (including PSA and Digital Rectal Examination), explanations about  
54  
55 changes to PSA levels, how cancer is detected, and treatment options and potential outcomes  
56  
57  
58  
59  
60

## A Community Jury and PSA Screening 7

(Jim Dickinson, Professor of Family Medicine, University of Calgary). Two further experts (a urologist and expert in prostate cancer (author RG) and an expert in evidence-based medicine (author PG) presented the benefits and harms of being screened for prostate cancer. Although both speakers aimed to give balanced presentations, one emphasised the benefits of PSA screening, in particular selective screening, (RG <http://youtu.be/9vPt3NAcG8g>) and the other the harms (PG <http://youtu.be/nifkjdZKmsU>). Both presentations focused on the evidence from the two trials of PSA population screening. However, both presenters also made reference to lower levels of evidence relating to the risks of metastases if a cancer remains undetected due to a lack of screening and the consequences of treating localised disease detected during screening. ~~Each presentation ran for approximately 45 minutes, with 15 minutes for questions.~~ After each presentation, men were able to deliberate on the information and could ask the experts any questions. The men reflected on the information overnight and returned on Sunday to deliberate and discuss the information presented the day before, including asking any further questions of the expert witnesses by phone.

A nominal group technique was used on both days to elicit individual thoughts prior to group deliberations. After the final deliberations on Sunday, including the community level decisions, the men in the community jury completed the post-assessment survey. Men in the control group were contacted on the Monday and either completed the post-assessment survey by phone or mailed the survey back to researchers the same week. Three months after the community jury weekend, all men in both groups were re-contacted and completed a follow-up survey.

**Non-protocol Extension**

Because they indicated a strong desire to have the experience of the community jury weekend, after their three-month follow-up survey the control group was offered the same community jury experience. Six of the 14 men randomised to the control group participated

## A Community Jury and PSA Screening 8

in the second community jury (Figure 1). The two primary experts were the same as for the original community jury group, however, the scientific advisor was changed to a female general practitioner and professor of clinical epidemiology (author JD). A final post-jury survey was conducted with the second community jury.

**Measures**

We collected demographic information, history of previous PSA testing and information sources for PSA screening at the introductory session. In each of the three surveys, men were asked to nominate on a scale 0 to 10 (0 = *not at all*, 5 = *maybe*, and 10 = *absolutely*), whether they intended, while symptomless, to undergo PSA screening for prostate cancer in the future. They were also asked to nominate how informed they considered themselves in relation to the harms and benefits of screening for prostate cancer on a scale 0 to 4 (0 = *not at all* and 4 = *very*). We asked ~~six-four~~ knowledge questions in each survey that assessed a) the men's knowledge about the recommendation on PSA screening in the Australian general practice guidelines,<sup>7</sup> b) ~~the likelihood of being diagnosed with prostate cancer,<sup>19</sup>~~ c) ~~the likelihood of dying of prostate cancer,<sup>19</sup>~~ d) the accuracy of the PSA test and e) two questions about treatment options and side-effects of prostate cancer treatment (Box 1). Australia has a primary care based system, requiring a referral from a general practitioner to see a urologist. General practitioners are therefore responsible for the majority of the PSA screening tests requested in Australia. For this reason, we were interested in the participants' knowledge of current general practice guidelines.

**Statistical Analyses**

Pre- to post-, and post- to follow-up assessment differences between the groups were examined with ANCOVA and Fisher's exact test. It was anticipated that the number of PSA tests previously undertaken would impact on a man's future decision to be screened for prostate cancer with the PSA test.<sup>20-19</sup> Therefore we conducted the analyses with adjustment



## A Community Jury and PSA Screening 9

for baseline intention-to-screen and the number of times a man had already received a PSA test. Unadjusted post-assessment analyses were conducted using an independent t-test. All analyses were conducted on an intention-to-treat basis.

## Results

### Participant Demographics

Of the 59 men who contacted the research team, 27 respondents were available on the set date and elected to participate in the study. One man was excluded post-randomisation as his age exceeded the limit of the study (see Figure 1). Participating men's ages ranged between 53 and 70 years (average 62 years,  $SD = 4.8$ ). Further demographic information is described in Table 1. There was no loss to follow up during the course of the study. The groups were similar at baseline in age, number of times previously screened for prostate cancer, and whether they intended to be screened for prostate cancer in the future. All but 3 men had previously had a PSA test; 14 had been tested 2 or 3 times, 4 on one occasion, two 6 times, and 3 men had been tested on 7, 8, and 12 occasions each. No men had undergone a biopsy. At pre-assessment, the majority of men (16/26, 62%) agreed with the statement that routine screening for prostate cancer saved lives, whereas 4 (15%) disagreed and 6 (23%) did not know (Table 1). The men reported a variety of sources for how they accessed information about prostate cancer screening, with the most common source of information being their general practitioner (Table 2).

### Changes in Intention-to-Screen and Individual Knowledge

**Pre-to post-intervention.** At post-assessment, men in the community jury group had significantly less intention-to-screen for prostate cancer on the 0 to 10 scale than men in the control group (median score 2.5 and 7.0, Effect Size= -0.6SD,  $p=0.05$ ). When we adjusted for baseline intention to be screened for prostate cancer and the number of prior PSA tests,

## A Community Jury and PSA Screening 10

the mean difference was 3.7 ( $p=.005$ , Table 3). The unadjusted mean difference between the groups was 2.7 (Figure 2).

After completion of the community jury weekend, men in the jury group considered themselves more informed about screening for prostate cancer than the control group (median score 4.0 and 2.0, mean difference = 1.7, Effect Size=1.2SD,  $p<0.001$ ). ~~Compared with the control group, the community jury participants were more likely to “correctly” identify how many men out of 1000 would be likely to die from prostate cancer as indicated in the knowledge question from Fagerlin et al<sup>19</sup> ( $p=0.004$ ), but not how many would be diagnosed<sup>19</sup> ( $p=.44$ ). Compared with the control group, the community jury group was also more likely to correctly identify that the PSA test was not always accurate in indicating the likelihood of prostate cancer as it had both false positive and false negative results ( $p=0.03$ , Table 4).~~

**Post-to 3 month follow-up assessment.** The influence of the community jury experience was sustained at 3 months: men in the community jury group maintained their intention-to-screen score at 3 months (Figure 2) whereas there was a slight increase in the control group’s future intention-to-screen for prostate cancer. There was no further change in knowledge (Table 5).

### Community Level Questions

Men in the community jury voted unanimously (12/12) against a government campaign targeting the public about PSA screening for prostate cancer, and against a government organised invitation program. Unprompted, the jury members instead suggested the government provide a campaign that targeted general practitioners to assist them to provide better quality and more consistent information to their patients on the benefits and harms of screening for prostate cancer using the PSA test.<sup>18</sup>

**Non-protocol Extension.** Compared with their 3-month follow-up scores, the men from the control group who completed the second community jury also subsequently

## A Community Jury and PSA Screening 11

increased their self-report score of how informed they considered themselves (mean score increased from 2.2 to 3.7), and decreased their future intention to be screened for prostate cancer (mean score decreased from 8 to 2.8). ~~There were similar pre to post changes in knowledge among those who participated in the second community jury: 68% were able to correctly identify how many men out of 1000 might die from prostate cancer and 50% correctly answered how many men would be diagnosed with prostate cancer in their lifetimes.~~

### Discussion

Compared with men who received standard information, participants in a 2-day community jury considered themselves better informed about the benefits and harms of PSA screening and reduced their stated intention to participate in screening in the future. Although the process led to some men ~~to~~ changing their minds about participating in PSA screening, others said they would continue to be tested; highlighting the individual nature of this decision and the need for informed consent.<sup>24</sup>

Yet despite differences in the men's individual intentions to be screened for prostate cancer, the group was unanimous in opposing any government-sponsored community campaign. Our findings demonstrate the capacity of a community jury to consider complex information on the harms and benefits of screening, and to distinguish individual from community choices. This echoes the findings of a New Zealand community jury on mammography screening<sup>13</sup> which also indicated that community juries are able to differentiate between individual and public health needs.

All deliberative democracy methods rely on engagement of those who have an interest in the topic and agree to take part. The generalisability of our study findings may be limited by the uncertain representativeness of a jury of volunteers from the Gold Coast, Australia, who may be different in several ways to men in the wider Australian community. For

## A Community Jury and PSA Screening 12

example, 88% of our participants had already had at least one PSA test, implying that prior to the community jury they were more likely to be favorably disposed to PSA screening.

The authors considered PSA screening an appropriate topic for engaging middle-aged men because the data are equivocal and guidelines differ.<sup>2,7,8</sup> However, we also acknowledge the limitations of these mass population studies. Neither the ERSPC<sup>3</sup> nor PLCO<sup>4</sup> trials has a median follow-up long enough to reliably address prostate cancer mortality and their respective methodologies have been criticised.<sup>22-21</sup> This limitation may have impacted the community jury decision. Nevertheless, this pilot study does illustrate the potential of the community jury approach to instruct a cross section of men of different ages, with different backgrounds, and educational levels.

Whether and how sampling and recruitment techniques affect community jury outcomes are important research questions yet to be examined. Other important methodological questions for community research include: what are the impacts on group decisions of normative (conformity to group thinking) or informational (discussion of facts) influences?<sup>23-22</sup> and when and how in the deliberation process do community jury participants form their conclusions?

Our results have implications for clinical and public health practice. A large proportion of men have not been engaged in an evidence-informed discussion of the potential benefits and harms of screening prior to their physician ordering a PSA test<sup>23,24,25</sup>; have not been asked about their screening preferences prior to a PSA screening test<sup>26,5</sup>; and some doctors screen without a discussion.<sup>27,6</sup> Alarming, a study conducted in the theatre waiting room in men waiting to undergo a trans rectal ultrasound and prostate biopsy found 8% were unaware their primary care provider had conducted a PSA screening test.<sup>28,7</sup> Current practice of PSA screening in asymptomatic men is not standardised. Our findings reinforce the importance of presenting the potential benefits and harms of PSA testing to men interested in being

Formatted: Superscript

## A Community Jury and PSA Screening 13

1  
2  
3  
4  
5  
6  
7 screened, primarily because such information will lead some men to change their mind once  
8 fully informed. When practitioners are faced with the difficult situation of being asked to  
9 determine such a decision on behalf of their patient, in addition to considering their  
10 individual patient's history, concerns, and priorities, it may be valuable to also have available  
11 information about community attitudes and concerns regarding screening.<sup>210</sup>  
12  
13  
14  
15  
16  
17

18 **Contributors** RT led the preparations and revisions of the manuscript, had full access to all  
19 of the data in the study and takes responsibility for the accuracy of the data analyses. PG and  
20 JD led the conception and design of the study, contributed to the interpretation of the data,  
21 and made substantial revisions to the manuscript. LR contributed to the study design and  
22 made substantial revisions to the manuscript. GM and RG contributed to the study design,  
23 interpretation of data and made significant revisions to the manuscript.  
24  
25  
26  
27  
28  
29

30 We thank Jim Dickinson PhD FRACGP, Professor of Family Medicine, University of  
31 Calgary, Canada for kindly providing his scientific expertise as our scientific advisor in the  
32 community jury. He did not receive compensation for his contribution. We also thank Sir Iain  
33 Chalmers DSc, James Lind Initiative, Oxford, UK for his helpful comments on an earlier  
34 draft.  
35  
36  
37  
38

39 **Funding Support** This work was supported by a Bond University Vice Chancellor's  
40 Research Grant Scheme, an Australian National Health and Medical Research Council  
41 (NHMRC) Project Grant (#1023791), and a NHMRC Screening and Test Evaluation  
42 Program (STEP) grant (#633033).  
43  
44  
45  
46

47 **Competing Interests** All authors have completed the ICMJE uniform disclosure form and  
48 declare: RT, JD, PG, and GM received funding support from Bond University; RT, JD and  
49 PG also received funding support from a NHMRC Program grant (#633033); LR received  
50  
51  
52  
53  
54  
55  
56  
57  
58  
59  
60

## A Community Jury and PSA Screening 14

funding support from a NHMRC funding grant (#1023197); no other relationships or activities that could appear to have influenced the submitted work.

**Ethics Approval** The research project was approved by the Bond University Human Research Ethics Committee (RO1570).

**Data Sharing Statement** In addition to the quantitative analysis reported in this paper, a qualitative analysis of the jury deliberations and recommendations was conducted and reported elsewhere and cited as reference 18. Additional data is available by emailing the first author.

## A Community Jury and PSA Screening 15

## References

1. Katz MH. Can we stop ordering prostate-specific antigen screening tests? *JAMA Intern Med* 2013;173(10): 847-8.
2. Ilic D, Neuberger MM, Djulbegovic M, Dahm P. Screening for prostate cancer. The Cochrane Database of Syst Rev 2013;Issue 1. Art No.:CD004720. doi: 10.1002/14651858.CD004720.pub3.
3. Schröder FH, Hugosson J, Roobol MJ, Tammela TLJ, Ciatto S, Nelen V, et al. Prostate-Cancer Mortality at 11 Years of Follow-up. *N Engl J Med* 2012;366(11):981-90.
4. Andriole GL, Crawford ED, Grubb RL, 3rd, Buys SS, Chia D, Church TR, et al. Prostate cancer screening in the randomized Prostate, Lung, Colorectal, and Ovarian Cancer Screening Trial: mortality results after 13 years of follow-up. *J Natl Cancer Inst* 2012;104(2):125-32.
5. Moyer VA. Screening for Prostate Cancer: U.S. Preventive Services Task Force Recommendation Statement. *Ann Intern Med* 2012;157(2):120-34.
6. Carter HB, Albertsen PC, Barry MJ, Etzioni R, Freedland SJ, Greene KL, et al. Early detection of prostate cancer: AUA Guideline. *J Urol* 2013;190(2):419-26. doi:10.1016/j.juro.2013.04.119
7. Guidelines for preventive activities in general practice, 8th edn. East Melbourne: Royal Australian College of General Practitioners, 2012.
8. Urology Society of Australia and New Zealand PSA testing policy accessed April 2013 from [http://www.usanz.org.au/uploads/29168/ufiles/USANZ\\_2009\\_PSA\\_Testing\\_Policy\\_Final.pdf](http://www.usanz.org.au/uploads/29168/ufiles/USANZ_2009_PSA_Testing_Policy_Final.pdf).
9. Benbassat J, Pilpel D, Tidhar, M. Patients' preferences for participation in clinical decision making: A review of published studies. *Behav Med* 1998;2:81-88. doi: 10.1080/08964289809596384
10. Deber RB, Kraetschmer N, Urowitz S, Sharpe N. Do people want to be autonomous patients? Preferred roles in treatment decision-making in several patient populations. *Health Expect* 2007;10:248-258. doi: 10.1111/j.1369-7625.2007.00441.x
11. Carman KL, Heeringa JW, Heil SKR, Garfinkel S, Windham A, Gilmore D, Ginsburg M, Sofaer S, Gold M, Pathak-Sen E. The Use of Public Deliberation in Eliciting Public Input: Findings from a Literature Review. (Prepared by the American Institutes for Research Under Contract No. 290-02-0009.) AHRQ Publication No. 13-EHC070-EF. Rockville, MD: Agency for Healthcare Research and Quality; February 2013

## A Community Jury and PSA Screening 16

- 1  
2  
3  
4  
5  
6  
7  
8  
9  
10  
11  
12  
13  
14  
15  
16  
17  
18  
19  
20  
21  
22  
23  
24  
25  
26  
27  
28  
29  
30  
31  
32  
33  
34  
35  
36  
37  
38  
39  
40  
41  
42  
43  
44  
45  
46  
47  
48  
49  
50  
51  
52  
53  
54  
55  
56  
57  
58  
59  
60
12. Abelson J, Eyles J, McLeod CB, Collins P, McMullan C, Forest PG. Does deliberation make a difference? Results from a citizens panel study of health goals priority setting. *Health Policy* 2003;66(1):95-106.
  13. Paul C, Nicholls R, Priest P, McGee R. Making policy decisions about population screening for breast cancer: The role of citizens' deliberation. *Health Policy* 2008;85(3):314-20.
  14. De Vries R, Stanczyk A, Wall IF, Uhlmann R, Damschroder LJ, Kim SY. Assessing the quality of democratic deliberation: A case study of public deliberation on the ethics of surrogate consent for research. *Soc Sci Med* 2010;70:1896-1903. doi:10.1016/j.socscimed.2010.02.031
  15. Parkin L, Paul C. Public good, personal privacy: a citizens' deliberation about using medical information for pharmacoepidemiological research. *J Epidemiol Community Health* 2011;65:150-156. doi:10.1136/jech.2009.097436
  16. Australian Cancer Council Factsheet: Early Detection of Prostate Cancer Accessed April 2013 from [http://www.cancer.org.au/content/pdf/Factsheets/Early\\_Detection\\_prostate-cancer-2013-revised.pdf](http://www.cancer.org.au/content/pdf/Factsheets/Early_Detection_prostate-cancer-2013-revised.pdf)
  17. Andrology Australia Factsheet: PSA testing Accessed April 2013 from [https://www.andrologyaustralia.org/wp-content/uploads/Factsheet\\_PSA-Test.pdf](https://www.andrologyaustralia.org/wp-content/uploads/Factsheet_PSA-Test.pdf)
  18. Rychetnik L, Doust J, Thomas R, Gardiner R, MacKenzie G, Glasziou P. A community jury on PSA screening: What do well-informed men want the government to do about prostate cancer screening? *BMJ Open* 2014;4:e004682. doi:10.1136/bmjopen-2013-004682
  - ~~19. Fagerlin A, Sepucha KR, Couper MP, Levin CA, Singer E, Zikmund-Fisher B. Patients' knowledge about 9 common health conditions: The DECISIONS survey. *Med Decis Making* 2010;30:355.~~
  - ~~20-19.~~ Staw BM. The escalation of commitment to a course of action. *Academy of Management* 1981;6(4):577-87.
  - ~~21-20.~~ Irwig L, Glasziou P. Informed consent for screening by community sampling. *Eff Clin Pract* 2000; 3(1):47-50.
  - ~~22-21.~~ National Health and Medical Research Council (2013). *Prostate-Specific Antigen (PSA) testing in asymptomatic men: Evidence Evaluation Report*. Canberra: National Health and Medical Research Council.



## A Community Jury and PSA Screening 17

- 23-22. Kaplan MF, Miller CE. Group decision making and normative versus informational influence: Effects of type of issue and assigned decision rule. *J Personality and Social Psychology* 1987;53(2):306-13.
- 24-23. Chan ECY, Vernon SW, Ahn C, Greisinger A. Do men know that they have had a prostate specific antigen test? Accuracy of self-reports of testing at 2 sites *Am J Public Health* 2004;94(8):1336-8.
- 25-24. Guerra CE, Jacobs SE, Holmes JH, Shea JA. Are physicians discussing prostate cancer screening with their patients and why or why not? A pilot study. *J Gen Intern Med* 2007;22(7):901-7.
- 26-25. Hoffman RM, Couper MP, Zikmund-Fisher BJ, Levin CA, McNaughton-Collins M, Helitzer DL, VanHoewyk J, Barry MJ. Prostate cancer screening decisions. Results from the National Survey of Medical Decisions (DECISIONS Study). *Arch Intern Med* 2009;169(17):1611-1618.
- 27-26. Volk RJ, Linder SK, Kallen MA, Galliher JM, Spano MS, Mullen PD, Spann SJ. Primary care physicians' use of an informed decision-making process for prostate cancer screening. *Ann Fam Med* 2013;1:67-74.
- 28-27. Pan D, McCahy P. Patient knowledge about prostate-specific antigen (PSA) and prostate cancer in Australia. *BJU Int* 2012; Sup 3:52-56

## A Community Jury and PSA Screening 18

## Box 1

## Knowledge Questions from Surveys (answers considered correct highlighted)

1. Is routine testing for prostate cancer recommended by RACGP Guidelines?

- Yes  No  Don't know

~~2. Out of every 1000 men, about how many do you think will be diagnosed with prostate cancer some time in their life? \*~~

- ~~0  1-14  15-25  >25  Don't know~~

~~3. Out of every 1000 men, about how many do you think will die from prostate cancer? \*~~

- ~~0  1-5  6-10  11-20  >20  Don't know~~

4.2. How accurate do you think the prostate specific antigen (PSA) blood test is for diagnosing prostate cancer?

- Reasonably accurate but some people *who do* have cancer can have a negative test result (false negative)
- Reasonably accurate but some people *who do not* have cancer can have an abnormal result (false positive)
- The PSA test is not always accurate because it can have both false positive or false negative results

The PSA test is completely accurate

Don't know

~~5.3. In terms of your knowledge about Prostate cancer, could you list some treatment options?~~

- ~~No  Yes, please list~~

~~6.4. Could you list some potential side effects of treatments for prostate cancer?~~

- ~~No  Yes, please list~~

~~\* questions from Fagerlin A, Sepucha KR, Couper MP, Levin CA, Singer E Zikmund Fisher B. Patients' knowledge about 9 common health conditions: The DECISIONS survey. *Med Decis Making* 2010;30:35S.~~

A Community Jury and PSA Screening 19

Figure 1 Consort Flow-Chart of Participants

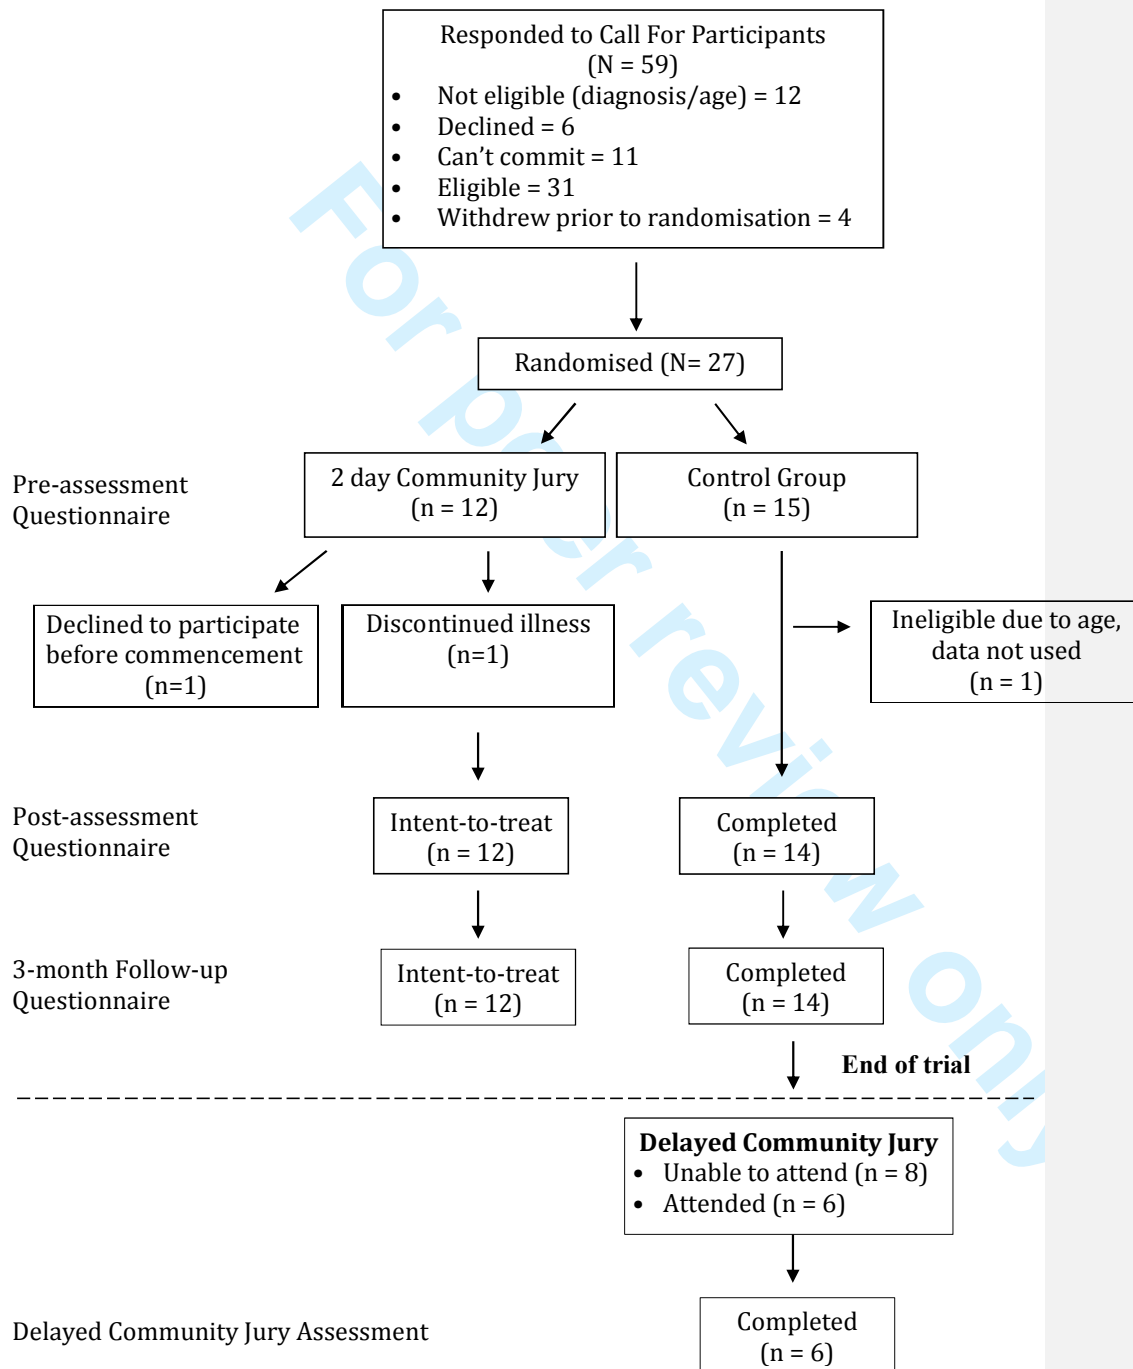

A Community Jury and PSA Screening 20

Figure 2 Future Intention-to-Screen Scores at Pre, Post, and Three Month Follow-up

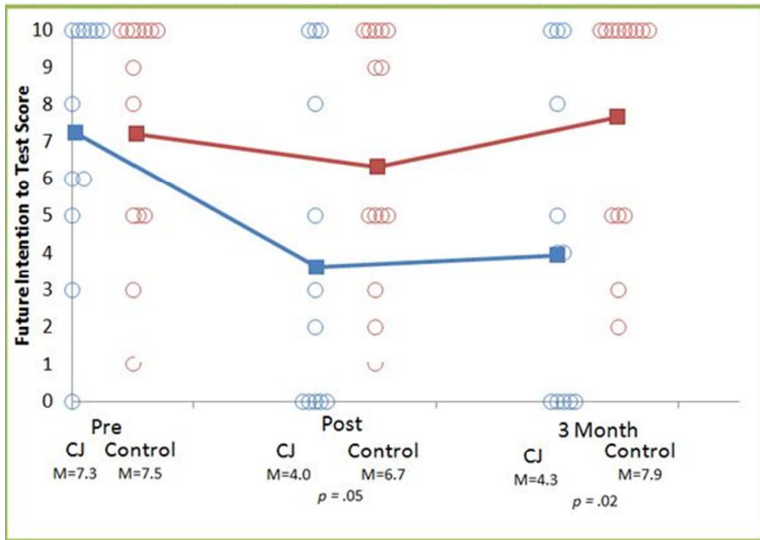

Note: CJ=Community Jury group; M = mean score; p values based on ANCOVA analyses pre to post and pre to 3 month follow-up.

## A Community Jury and PSA Screening 21

Table 1.  
Demographics of Participants

|                                        | Community Jury<br>(n=12) | (SD/%)  | Control<br>(n=14) | SD/%  |
|----------------------------------------|--------------------------|---------|-------------------|-------|
| <i>Age</i>                             |                          |         |                   |       |
| Mean                                   | 61                       | (4.8)   | 62                | (4.9) |
| <i>Number previous PSA tests</i>       |                          |         |                   |       |
| Mean                                   | 3.9                      | (3.6)   | 2.2*              | (1.8) |
| <i>Routine PSA testing saves lives</i> |                          |         |                   |       |
| Frequency                              | yes                      | 7 (58%) | 9 (64%)           |       |
|                                        | no                       | 2 (17%) | 2 (14%)           |       |
|                                        | don't know               | 3 (25%) | 3 (21%)           |       |
| <i>Education</i>                       |                          |         |                   |       |
| Frequency                              | High school or less      | 2 (17%) | 4 (28%)           |       |
|                                        | some uni or TAFE         | 4 (33%) | 4 (28%)           |       |
|                                        | uni/TAFE graduate        | 4 (33%) | 1 (7%)            |       |
|                                        | uni postgrad             | 2 (17%) | 5 (36%)           |       |

Note. \* n=13, (1 missing); TAFE = Technical and Further Education Institutions

Table 2  
Where do you get information about testing for prostate cancer? (N=26)

|                               | Agree | (%)  |
|-------------------------------|-------|------|
| I don't look for information  | 3     | (12) |
| Family and friends            | 11    | (42) |
| Internet                      | 10    | (38) |
| Media                         | 9     | (35) |
| General practitioner          | 17    | (65) |
| Urologist/specialist/hospital | 5     | (20) |

Note: men could endorse more than one source

## A Community Jury and PSA Screening 22

Table 3  
Linear Regression Analysis Predicting Future Intention-to-Screen for Prostate Cancer

|                                          | <i>Coefficient</i> | <i>SE B</i> | CI    |       | <i>p</i> |
|------------------------------------------|--------------------|-------------|-------|-------|----------|
|                                          |                    |             | Lower | Upper |          |
| Constant                                 | -0.16              | 1.69        | -3.66 | 3.35  | 0.93     |
| Pre-assessment intention-to-screen score | 0.74               | 0.18        | 0.36  | 1.11  | 0.001    |
| Number of previous PSA tests             | 0.63               | 0.22        | 0.18  | 1.07  | 0.008    |
| Group (Community Jury/Control)           | -3.69              | 1.19        | -6.16 | -1.21 | 0.005    |

Note. N=25; CI= confidence interval;  
These data are slightly different to Rychetnik et al (2014) analyses as they are based on intention-to-treat.

Table 4  
Changes in Men's Knowledge Scores from Pre- to Post-assessment

|                                          |                | Wrong to Right |      | Right to Right |      | Right to Wrong |      | Wrong to Wrong |      | <i>p</i> |
|------------------------------------------|----------------|----------------|------|----------------|------|----------------|------|----------------|------|----------|
|                                          |                | n              | (%)  | n              | (%)  | n              | (%)  | n              | (%)  |          |
| Recommended by guidelines?               | community jury | 4              | (42) | 3              | (25) | 1              | (8)  | 3              | (25) | 0.08     |
|                                          | control*       | 1              | (8)  | 1              | (8)  | 1              | (8)  | 10             | (77) |          |
| out of 1000, how many men are diagnosed? | community jury | 2              | (17) | 6              | (50) | 1              | (8)  | 3              | (25) | 0.4      |
|                                          | control        | 2              | (14) | 6              | (43) | 3              | (21) | 3              | (21) |          |
| - out of 1000, how many men die?         | community jury | 6              | (50) | 2              | (17) | 0              | (0)  | 4              | (33) | 0.004    |
|                                          | control        | 1              | (7)  | 0              | (0)  | 1              | (7)  | 12             | (86) |          |
| how accurate is the PSA test?            | community jury | 6              | (50) | 4              | (33) | 1              | (8)  | 1              | (8)  | 0.03     |
|                                          | control        | 2              | (14) | 9              | (64) | 0              | (0)  | 3              | (21) |          |
| list possible treatment options          | community jury | 2              | (17) | 7              | (58) | 0              | (0)  | 2              | (17) | 0.6      |
|                                          | control        | 3              | (21) | 7              | (50) | 0              | (0)  | 4              | (27) |          |
| list possible side effects of treatments | community jury | 3              | (25) | 7              | (58) | 0              | (0)  | 2              | (17) | 0.6      |
|                                          | control        | 3              | (21) | 7              | (50) | 0              | (0)  | 4              | (27) |          |

Note: \*n=13 (1 missing)

## A Community Jury and PSA Screening 23

Table 5  
Changes to Men's Knowledge Scores Post- to Follow-up Assessment

|                                          |                | Wrong to Right |      | Right to Right |      | Right to Wrong |      | Wrong to Wrong |      | <i>p</i> |
|------------------------------------------|----------------|----------------|------|----------------|------|----------------|------|----------------|------|----------|
|                                          |                | n              | (%)  | n              | (%)  | n              | (%)  | n              | (%)  |          |
| Recommended by guidelines?               | community jury | 0              | (0)  | 7              | (58) | 1              | (8)  | 4              | (33) | 0.7      |
|                                          | control*       | 0              | (0)  | 1              | (7)  | 1              | (7)  | 11             | (85) |          |
| out of 1000, how many men are diagnosed? | community jury | 1              | (8)  | 4              | (33) | 4              | (33) | 3              | (25) | 0.1      |
|                                          | control        | 0              | (0)  | 2              | (14) | 6              | (43) | 6              | (43) |          |
| out of 1000, how many men die?           | community jury | 2              | (17) | 6              | (50) | 2              | (17) | 2              | (17) | 0.6      |
|                                          | control        | 2              | (14) | 0              | (0)  | 2              | (14) | 10             | (71) |          |
| how accurate is the PSA test?            | community jury | 0              | (0)  | 10             | (83) | 0              | (0)  | 2              | (17) | 0.1      |
|                                          | control        | 2              | (14) | 9              | (64) | 2              | (14) | 1              | (7)  |          |

Note: \*n=13 (1 missing)

1  
2  
3  
4  
5  
6  
7  
8  
9  
10  
11  
12  
13  
14  
15  
16  
17  
18  
19  
20  
21  
22  
23  
24  
25  
26  
27  
28  
29  
30  
31  
32  
33  
34  
35  
36  
37  
38  
39  
40  
41  
42  
43  
44  
45  
46  
47  
48  
49  
50  
51  
52  
53  
54  
55  
56  
57  
58  
59  
60

Figure 1. Consort Flow-Chart of Participants

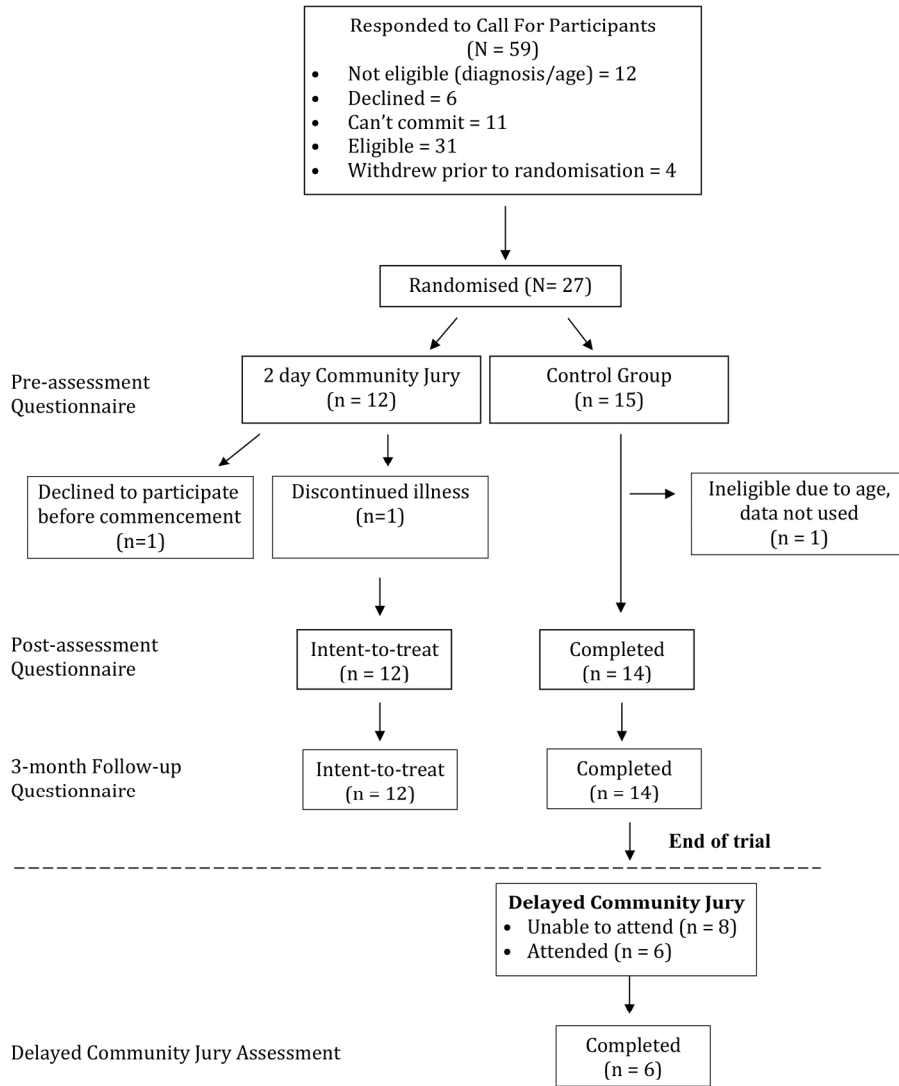



Figure 2. Future Intention-to-Screen Scores at Pre, Post, and Three Month Follow-up

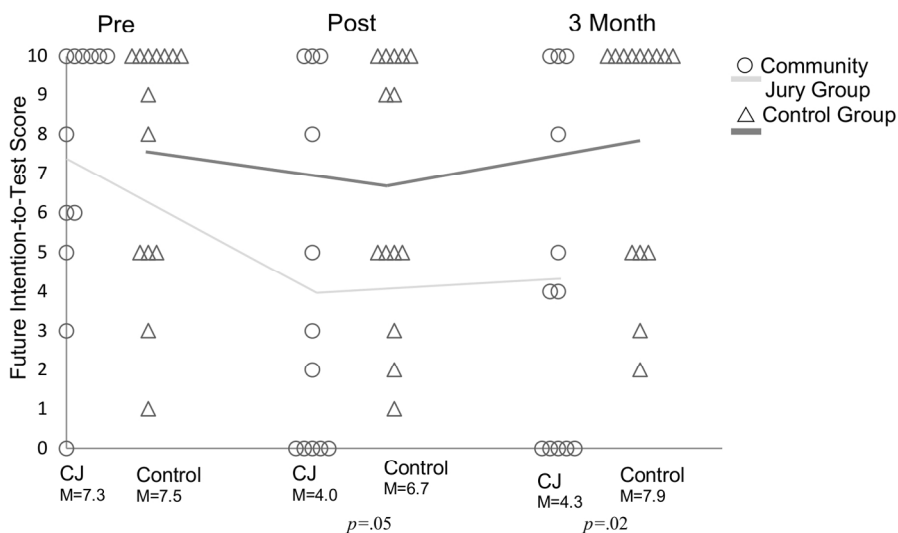

Note: CJ=Community Jury group; M = mean score; p values based on ANCOVA analyses pre to post and pre to 3 month follow-up.

view only



## CONSORT 2010 checklist of information to include when reporting a randomised trial\*

| Section/Topic                    | Item No | Checklist item                                                                                                                                                                              | Reported on page No |
|----------------------------------|---------|---------------------------------------------------------------------------------------------------------------------------------------------------------------------------------------------|---------------------|
| <b>Title and abstract</b>        |         |                                                                                                                                                                                             |                     |
|                                  | 1a      | Identification as a randomised trial in the title                                                                                                                                           | 1                   |
|                                  | 1b      | Structured summary of trial design, methods, results, and conclusions (for specific guidance see CONSORT for abstracts)                                                                     | 1-2                 |
| <b>Introduction</b>              |         |                                                                                                                                                                                             |                     |
| Background and objectives        | 2a      | Scientific background and explanation of rationale                                                                                                                                          | 4-5                 |
|                                  | 2b      | Specific objectives or hypotheses                                                                                                                                                           | 5                   |
| <b>Methods</b>                   |         |                                                                                                                                                                                             |                     |
| Trial design                     | 3a      | Description of trial design (such as parallel, factorial) including allocation ratio                                                                                                        | 5-6                 |
|                                  | 3b      | Important changes to methods after trial commencement (such as eligibility criteria), with reasons                                                                                          | NA                  |
| Participants                     | 4a      | Eligibility criteria for participants                                                                                                                                                       | 5-6                 |
|                                  | 4b      | Settings and locations where the data were collected                                                                                                                                        | 5                   |
| Interventions                    | 5       | The interventions for each group with sufficient details to allow replication, including how and when they were actually administered                                                       | 6-8                 |
| Outcomes                         | 6a      | Completely defined pre-specified primary and secondary outcome measures, including how and when they were assessed                                                                          | 8-9                 |
|                                  | 6b      | Any changes to trial outcomes after the trial commenced, with reasons                                                                                                                       | NA                  |
| Sample size                      | 7a      | How sample size was determined                                                                                                                                                              | 5                   |
|                                  | 7b      | When applicable, explanation of any interim analyses and stopping guidelines                                                                                                                | NA                  |
| <b>Randomisation:</b>            |         |                                                                                                                                                                                             |                     |
| Sequence generation              | 8a      | Method used to generate the random allocation sequence                                                                                                                                      | 6                   |
|                                  | 8b      | Type of randomisation; details of any restriction (such as blocking and block size)                                                                                                         | 6                   |
| Allocation concealment mechanism | 9       | Mechanism used to implement the random allocation sequence (such as sequentially numbered containers), describing any steps taken to conceal the sequence until interventions were assigned | 6                   |
| Implementation                   | 10      | Who generated the random allocation sequence, who enrolled participants, and who assigned participants to interventions                                                                     | 6                   |
| Blinding                         | 11a     | If done, who was blinded after assignment to interventions (for example, participants, care providers, those                                                                                | NA                  |

|                                                      |     |                                                                                                                                                   |          |
|------------------------------------------------------|-----|---------------------------------------------------------------------------------------------------------------------------------------------------|----------|
|                                                      |     | assessing outcomes) and how                                                                                                                       |          |
|                                                      | 11b | If relevant, description of the similarity of interventions                                                                                       | 6-7      |
| Statistical methods                                  | 12a | Statistical methods used to compare groups for primary and secondary outcomes                                                                     | 8-9      |
|                                                      | 12b | Methods for additional analyses, such as subgroup analyses and adjusted analyses                                                                  | 8-9      |
| <b>Results</b>                                       |     |                                                                                                                                                   |          |
| Participant flow (a diagram is strongly recommended) | 13a | For each group, the numbers of participants who were randomly assigned, received intended treatment, and were analysed for the primary outcome    | Figure 1 |
|                                                      | 13b | For each group, losses and exclusions after randomisation, together with reasons                                                                  | Figure 1 |
| Recruitment                                          | 14a | Dates defining the periods of recruitment and follow-up                                                                                           | 5-7      |
|                                                      | 14b | Why the trial ended or was stopped                                                                                                                | NA       |
| Baseline data                                        | 15  | A table showing baseline demographic and clinical characteristics for each group                                                                  | Table 1  |
| Numbers analysed                                     | 16  | For each group, number of participants (denominator) included in each analysis and whether the analysis was by original assigned groups           | 9        |
| Outcomes and estimation                              | 17a | For each primary and secondary outcome, results for each group, and the estimated effect size and its precision (such as 95% confidence interval) | 9-11     |
|                                                      | 17b | For binary outcomes, presentation of both absolute and relative effect sizes is recommended                                                       | NA       |
| Ancillary analyses                                   | 18  | Results of any other analyses performed, including subgroup analyses and adjusted analyses, distinguishing pre-specified from exploratory         | 10-11    |
| Harms                                                | 19  | All important harms or unintended effects in each group (for specific guidance see CONSORT for harms)                                             | None     |
| <b>Discussion</b>                                    |     |                                                                                                                                                   |          |
| Limitations                                          | 20  | Trial limitations, addressing sources of potential bias, imprecision, and, if relevant, multiplicity of analyses                                  | 11-12    |
| Generalisability                                     | 21  | Generalisability (external validity, applicability) of the trial findings                                                                         | 11-12    |
| Interpretation                                       | 22  | Interpretation consistent with results, balancing benefits and harms, and considering other relevant evidence                                     | 11-13    |
| <b>Other information</b>                             |     |                                                                                                                                                   |          |
| Registration                                         | 23  | Registration number and name of trial registry                                                                                                    | 2        |
| Protocol                                             | 24  | Where the full trial protocol can be accessed, if available                                                                                       | 2        |
| Funding                                              | 25  | Sources of funding and other support (such as supply of drugs), role of funders                                                                   | 13       |

\*We strongly recommend reading this statement in conjunction with the CONSORT 2010 Explanation and Elaboration for important clarifications on all the items. If relevant, we also recommend reading CONSORT extensions for cluster randomised trials, non-inferiority and equivalence trials, non-pharmacological treatments, herbal interventions, and pragmatic trials. Additional extensions are forthcoming: for those and for up to date references relevant to this checklist, see [www.consort-statement.org](http://www.consort-statement.org).

# BMJ Open

**Deliberative democracy and cancer screening consent: a randomised control trial of the effect of a community jury on men's knowledge about and intentions to participate in PSA screening.**

|                                 |                                                                                                                                                                                                                                                                                                                                                                                                                                                                                                                                                                     |
|---------------------------------|---------------------------------------------------------------------------------------------------------------------------------------------------------------------------------------------------------------------------------------------------------------------------------------------------------------------------------------------------------------------------------------------------------------------------------------------------------------------------------------------------------------------------------------------------------------------|
| Journal:                        | <i>BMJ Open</i>                                                                                                                                                                                                                                                                                                                                                                                                                                                                                                                                                     |
| Manuscript ID:                  | bmjopen-2014-005691.R2                                                                                                                                                                                                                                                                                                                                                                                                                                                                                                                                              |
| Article Type:                   | Research                                                                                                                                                                                                                                                                                                                                                                                                                                                                                                                                                            |
| Date Submitted by the Author:   | 11-Nov-2014                                                                                                                                                                                                                                                                                                                                                                                                                                                                                                                                                         |
| Complete List of Authors:       | Thomas, Rae; Bond University, Faculty of Health Sciences and Medicine<br>Glasziou, Paul; Bond University, Faculty of Health Sciences and Medicine<br>Rychetnik, Lucie; University of Notre Dame Australia, School of Medicine<br>Sydney; University of Sydney, School of Public Health<br>MacKenzie, Geraldine; Bond university, Faculty of Law<br>Gardiner, Robert; University of Queensland, Centre for Clinical Research &<br>Department of Urology, Royal Brisbane & Women's Hospital<br>Doust, Jenny; Bond University, Faculty of Health Sciences and Medicine |
| <b>Primary Subject Heading</b>: | Public health                                                                                                                                                                                                                                                                                                                                                                                                                                                                                                                                                       |
| Secondary Subject Heading:      | General practice / Family practice, Health policy                                                                                                                                                                                                                                                                                                                                                                                                                                                                                                                   |
| Keywords:                       | Health policy < HEALTH SERVICES ADMINISTRATION & MANAGEMENT, PRIMARY CARE, PUBLIC HEALTH, Prostate Specific Antigen testing, Prostate Cancer                                                                                                                                                                                                                                                                                                                                                                                                                        |
|                                 |                                                                                                                                                                                                                                                                                                                                                                                                                                                                                                                                                                     |

SCHOLARONE™  
Manuscripts

**Title Page**

Deliberative democracy and cancer screening consent: a randomised control trial of the effect of a community jury on men's knowledge about and intentions to participate in PSA screening.

**Authors**

Rae Thomas<sup>1</sup>  
Paul Glasziou<sup>1</sup>  
Lucie Rychetnik<sup>2</sup>  
Geraldine Mackenzie<sup>3</sup>  
Robert Gardiner<sup>4</sup>  
Jenny Doust<sup>1</sup>

<sup>1</sup>Centre for Research in Evidence-Based Practice (CREBP), Faculty of Health Sciences and Medicine, Bond University, Queensland, Australia

<sup>2</sup>School of Medicine, University of Notre Dame, Sydney, NSW, Australia and School of Public Health, University of Sydney, NSW, Australia

<sup>3</sup>Faculty of Law, Bond University, Queensland, Australia

<sup>4</sup>University of Queensland Centre for Clinical Research & Department of Urology, Royal Brisbane & Women's Hospital, Queensland, Australia

Abstract word count: 298

Manuscript word count: 2685

Corresponding Author:

Rae Thomas

Centre for Research in Evidence-Based Practice (CREBP), Faculty of Health Sciences and Medicine, Bond University, Queensland, Australia

Tel: +617 55955521

Fax +617 55951271

Email [rthomas@bond.edu.au](mailto:rthomas@bond.edu.au)

**Abstract**

**Objective** Prostate-specific antigen (PSA) screening is controversial. A community jury allows presentation of complex information and may clarify how participants view screening after being well-informed of the benefits and harms. We examined whether participating in a community jury had an effect on men's knowledge about and their intention to participate in PSA screening.

**Design** Random allocation to either a 2-day community jury or control group, with pre- post- and three-month follow-up.

**Setting** Participants from the Gold Coast (Australia) recruited via radio, newspaper, and community meetings.

**Participants** Twenty-six men aged 50-70 years with no previous diagnosis of prostate cancer.

**Intervention** The control group (n= 14) received factsheets on PSA screening. Community jury participants (n= 12) received the same factsheets and further information about screening for prostate cancer. In addition, three experts presented information on PSA screening: a neutral scientific adviser provided background information, one expert emphasised the potential benefits of screening, and another expert emphasised the potential harms.

Participants discussed information, asked questions of the experts and deliberated on personal and policy decisions.

**Main Outcome and Measures** Our primary outcome was change in individual intention to have a PSA screening test. We also assessed knowledge about screening for prostate cancer.

**Results** Analyses were conducted using intention-to-treat. Immediately after the jury, the community jury group had less intention-to-screen for prostate cancer than men in the control group (effect size = -0.6SD,  $p=0.05$ ). This was sustained at three-month follow-up.

1  
2  
3 Community jury men also correctly identified PSA test accuracy and considered themselves  
4 more informed (effect size 1.2SD,  $p < 0.001$ ).  
5  
6

7 **Conclusions** Evidence-informed deliberation of harms and benefits of PSA screening effects  
8 men's individual choice to be screened for prostate cancer. Community juries may be a valid  
9 method for eliciting target group input to policy decisions.  
10  
11  
12

13  
14  
15  
16 **Trial Registration** Australian and New Zealand Clinical Trials Registry  
17 (ACTRN12612001079831)  
18  
19

#### 20 21 22 23 **Strengths and limitations of this study**

- 24  
25 • This is the first study to use scientific methods to evaluate the effect of a community  
26 jury on an individual's knowledge and decisions.  
27
- 28  
29 • Participants in community juries make value-based decisions from complex  
30 information and can differentiate individual from community choices.  
31  
32
- 33  
34 • Expert presentations were based on large population studies that have limitations.  
35
- 36  
37 • The sample size of this study was small, but the results were clear and sustained.  
38
- 39  
40 • How sampling, recruitment techniques, and group processes affect community jury  
41 outcomes are yet to be examined.  
42  
43  
44  
45  
46  
47  
48  
49  
50  
51  
52  
53  
54  
55  
56  
57  
58  
59  
60

## Introduction

Screening for prostate cancer by prostate-specific antigen (PSA) testing is controversial<sup>1</sup> and the benefits and harms of screening are uncertain.<sup>2</sup> The results of two large randomised controlled trials of population screening (the ERSPC trial in Europe<sup>3</sup> and the PLCO trial in the United States<sup>4</sup>) were much anticipated, but the differing methods and results have led to conflicting interpretations and recommendations from expert groups.<sup>5,6</sup> Given the uncertainty, most guidelines recommend that men should be fully informed of the potential advantages and disadvantages of screening prior to having a PSA test.<sup>5,7,8</sup> Although individuals vary in the degree to which they want to engage with the evidence about their health concerns, a majority consistently report an interest in sharing health care decisions with their treating doctor.<sup>9,10</sup> However, providing the complex information relevant to men who are interested in PSA screening remains challenging.

Citizens' deliberation methodologies, such as community juries can facilitate the communication of complex evidence and aim to elicit 'informed' community perspectives for the purpose of guiding services and public policy. A range of community jury processes have been described, but the common features are i) participants are drawn from the lay public; ii) the jury deliberates on a question requiring an ethics or values-based decision (as opposed to a problem requiring a technical solution); iii) the jury is provided with information on the relevant issues and possible positions from expert "witnesses", with the opportunity to ask them questions; and iv) the jury then engages in a deliberation phase with participants discussing their preferences, opinions, values and positions, and attempt to reach a consensus position.<sup>11</sup>

Community juries have been conducted on topics such as public health priorities,<sup>12</sup> mammography screening,<sup>13</sup> and health research.<sup>14,15</sup> A recent review of deliberation methodologies found only four unique studies that compared deliberative methodologies with



1  
2  
3 a control group; only two of these were in relation to health topics.<sup>11</sup> While theoretically  
4  
5 sound,<sup>11</sup> community juries are a resource-intensive process and it is uncertain whether the  
6  
7 views of those participating are better “informed” than those of a public provided with  
8  
9 reading material on the same topic. It is also unclear whether and how being informed  
10  
11 influences a jury’s conclusions. If community juries are to be used to inform screening  
12  
13 policy, it is essential to understand the capacity of a community jury process to support  
14  
15 better-informed conclusions by its participants.  
16  
17

18  
19 The aim of this study was to examine the degree to which participants of a community  
20  
21 jury on PSA screening of asymptomatic men were better “informed” than other citizens and,  
22  
23 based on the ERSPC<sup>3</sup> and PLCO<sup>4</sup> trials together with the general practice guidelines, whether  
24  
25 evidence-informed deliberations of the benefits and harms of PSA screening impact on men’s  
26  
27 intention to be screen for prostate cancer. We conducted a randomised controlled trial that  
28  
29 compared a community jury with men allocated to receive typical information. As part of the  
30  
31 community jury process, men were also asked to deliberate on two community focused  
32  
33 questions:  
34  
35

- 36 • Should government campaigns be provided (on PSA screening) and if so, what  
37 information should be included in those campaigns?
- 38 • What do you as a group of men think about a government organised invitation  
39 program for testing for prostate cancer?  
40  
41  
42  
43  
44

45 This is the first randomised controlled trial of a deliberative democracy process on the topic  
46  
47 of PSA screening.  
48  
49

## 50 51 52 **Method**

53  
54 We recruited men in the target age group of 50 to 70 years from the Gold Coast region  
55  
56 (Australia) who had no previous diagnosis of prostate cancer, using media advertisements,  
57  
58  
59  
60

1  
2  
3 radio interviews, and community groups. Men with a family history of prostate cancer were  
4  
5 not excluded from participating. Eligible and available respondents attended a session on a  
6  
7 Friday evening to receive a full briefing on the study; all agreed to participate and completed  
8  
9 a consent form, before being randomly allocated to either a community jury group or a  
10  
11 control group (Figure 1). Random allocation occurred by each man selecting a piece of paper  
12  
13 with the name of either group from an opaque container. The research project was approved  
14  
15 by the Bond University Human Research Ethics Committee (R01570) and the protocol  
16  
17 registered with the Australian and New Zealand Clinical Trials Registry  
18  
19 (ACTRN12612001079831).  
20  
21  
22

23 All men were given standard PSA fact sheets from the Cancer Council Australia and  
24  
25 Andrology Australia.<sup>16,17</sup> In addition to the factsheets, men in the community jury group also  
26  
27 received a Cochrane Collaboration plain language statement,<sup>2</sup> information from the Royal  
28  
29 Australian College of General Practitioners' Guidelines for "Preventive Activities in General  
30  
31 Practice" pertaining to screening for prostate cancer,<sup>7</sup> and the Executive Summary of "PSA  
32  
33 Testing" from the Urology Society of Australia and New Zealand.<sup>8</sup> Men in both groups  
34  
35 received \$20 gift cards as reimbursement for their time at the introductory session and for  
36  
37 each survey. The community jury group received an \$80 gift card as reimbursement for  
38  
39 attending the community jury weekend. Men in the control group were given a follow-up  
40  
41 survey with a return stamped envelope to be mailed after the weekend.  
42  
43  
44

45 The community jury weekend and a qualitative analysis of the jury deliberations have  
46  
47 been described in detail elsewhere.<sup>18</sup> In brief, the community jury consisted of an iterative  
48  
49 process of education and deliberation. Three experts presented to the community jury on day  
50  
51 one: a neutral scientific advisor discussed medical information regarding the role of the  
52  
53 prostate, screening tests (including PSA and Digital Rectal Examination), explanations about  
54  
55 changes to PSA levels, how cancer is detected, and treatment options and potential outcomes  
56  
57  
58  
59  
60

1  
2  
3 (Jim Dickinson, Professor of Family Medicine, University of Calgary). Two further experts  
4  
5 (a urologist and expert in prostate cancer (author RG) and an expert in evidence-based  
6  
7 medicine (author PG) presented the benefits and harms of being screened for prostate cancer.  
8  
9 Although both speakers aimed to give balanced presentations, one emphasised the benefits of  
10  
11 PSA screening, in particular selective screening, (RG <http://youtu.be/9vPt3NAcG8g>) and the  
12  
13 other the harms (PG <http://youtu.be/nifkjdZKmsU>). Both presentations focused on the  
14  
15 evidence from the two trials of PSA population screening. However, both presenters also  
16  
17 made reference to lower levels of evidence relating to the risks of metastases if a cancer  
18  
19 remains undetected due to a lack of screening and the consequences of treating localised  
20  
21 disease detected during screening. After each presentation, men were able to deliberate on the  
22  
23 information and could ask the experts any questions. The men reflected on the information  
24  
25 overnight and returned on Sunday to deliberate and discuss the information presented the day  
26  
27 before, including asking any further questions of the expert witnesses by phone.  
28  
29  
30  
31

32 A nominal group technique was used on both days to elicit individual thoughts prior to  
33  
34 group deliberations. After the final deliberations on Sunday, including the community level  
35  
36 decisions, the men in the community jury completed the post-assessment survey. Men in the  
37  
38 control group were contacted on the Monday and either completed the post-assessment  
39  
40 survey by phone or mailed the survey back to researchers the same week. Three months after  
41  
42 the community jury weekend, all men in both groups were re-contacted and completed a  
43  
44 follow-up survey.  
45  
46

### 47 **Non-protocol Extension**

48  
49 Because they indicated a strong desire to have the experience of the community jury  
50  
51 weekend, after their three-month follow-up survey the control group was offered the same  
52  
53 community jury experience. Six of the 14 men randomised to the control group participated  
54  
55 in the second community jury (Figure 1). The two primary experts were the same as for the  
56  
57  
58  
59  
60

1  
2  
3 original community jury group, however, the scientific advisor was changed to a female  
4  
5 general practitioner and professor of clinical epidemiology (author JD). A final post-jury  
6  
7 survey was conducted with the second community jury.  
8

### 9 10 **Measures**

11  
12 We collected demographic information, history of previous PSA testing and  
13  
14 information sources for PSA screening at the introductory session. In each of the three  
15  
16 surveys, men were asked to nominate on a scale 0 to 10 (0 = *not at all*, 5 = *maybe*, and 10 =  
17  
18 *absolutely*), whether they intended, while symptomless, to undergo PSA screening for  
19  
20 prostate cancer in the future. They were also asked to nominate how informed they  
21  
22 considered themselves in relation to the harms and benefits of screening for prostate cancer  
23  
24 on a scale 0 to 4 (0 = *not at all* and 4 = *very*). We asked four knowledge questions in each  
25  
26 survey that assessed a) the men's knowledge about the recommendation on PSA screening in  
27  
28 the Australian general practice guidelines,<sup>7</sup> b) the accuracy of the PSA test and c) two  
29  
30 questions about treatment options and side-effects of prostate cancer treatment (Box 1).  
31  
32 Australia has a primary care based system, requiring a referral from a general practitioner to  
33  
34 see a urologist. General practitioners are therefore responsible for the majority of the PSA  
35  
36 screening tests requested in Australia. For this reason, we were interested in the participants'  
37  
38 knowledge of current general practice guidelines.  
39  
40  
41  
42

### 43 **Statistical Analyses**

44  
45 Pre- to post-, and post- to follow-up assessment differences between the groups were  
46  
47 examined with ANCOVA and Fisher's exact test. It was anticipated that the number of PSA  
48  
49 tests previously undertaken would impact on a man's future decision to be screened for  
50  
51 prostate cancer with the PSA test.<sup>19</sup> Therefore we conducted the analyses with adjustment for  
52  
53 baseline intention-to-screen and the number of times a man had already received a PSA test.  
54  
55  
56  
57  
58  
59  
60

1  
2  
3 Unadjusted post-assessment analyses were conducted using an independent t-test. All  
4  
5 analyses were conducted on an intention-to-treat basis.  
6  
7  
8

## 9 10 **Results**

### 11 **Participant Demographics**

12  
13  
14 Of the 59 men who contacted the research team, 27 respondents were available on the set  
15  
16 date and elected to participate in the study. One man was excluded post-randomisation as his  
17  
18 age exceeded the limit of the study (see Figure 1). Participating men's ages ranged between  
19  
20 53 and 70 years (average 62 years,  $SD = 4.8$ ). Further demographic information is described  
21  
22 in Table 1. There was no loss to follow up during the course of the study. The groups were  
23  
24 similar at baseline in age, number of times previously screened for prostate cancer, and  
25  
26 whether they intended to be screened for prostate cancer in the future. All but 3 men had  
27  
28 previously had a PSA test; 14 had been tested 2 or 3 times, 4 on one occasion, two 6 times,  
29  
30 and 3 men had been tested on 7, 8, and 12 occasions each. No men had undergone a biopsy.  
31  
32 At pre-assessment, the majority of men (16/26, 62%) agreed with the statement that routine  
33  
34 screening for prostate cancer saved lives, whereas 4 (15%) disagreed and 6 (23%) did not  
35  
36 know (Table 1). The men reported a variety of sources for how they accessed information  
37  
38 about prostate cancer screening, with the most common source of information being their  
39  
40 general practitioner (Table 2).  
41  
42  
43  
44

### 45 **Changes in Intention-to-Screen and Individual Knowledge**

46  
47 **Pre-to post-intervention.** At post-assessment, men in the community jury group had  
48  
49 significantly less intention-to-screen for prostate cancer on the 0 to 10 scale than men in the  
50  
51 control group (median score 2.5 and 7.0, Effect Size=  $-0.6SD$ ,  $p=0.05$ ). When we adjusted  
52  
53 for baseline intention to be screened for prostate cancer and the number of prior PSA tests,  
54  
55  
56  
57  
58  
59  
60

1  
2  
3 the mean difference was 3.7 ( $p=.005$ , Table 3). The unadjusted mean difference between the  
4  
5 groups was 2.7 (Figure 2).  
6

7 After completion of the community jury weekend, men in the jury group considered  
8 themselves more informed about screening for prostate cancer than the control group (median  
9 score 4.0 and 2.0, mean difference = 1.7, Effect Size=1.2SD,  $p<0.001$ ). Compared with the  
10 control group, the community jury group was more likely to correctly identify that the PSA  
11 test was not always accurate in indicating the likelihood of prostate cancer as it had both false  
12 positive and false negative results ( $p=0.03$ , Table 4).  
13  
14  
15  
16  
17  
18  
19

20 **Post-to 3 month follow-up assessment.** The influence of the community jury  
21 experience was sustained at 3 months: men in the community jury group maintained their  
22 intention-to-screen score at 3 months (Figure 2) whereas there was a slight increase in the  
23 control group's future intention-to-screen for prostate cancer. There was no further change in  
24 knowledge (Table 5).  
25  
26  
27  
28  
29  
30

### 31 **Community Level Questions**

32 Men in the community jury voted unanimously (12/12) against a government campaign  
33 targeting the public about PSA screening for prostate cancer, and against a government  
34 organised invitation program. Unprompted, the jury members instead suggested the  
35 government provide a campaign that targeted general practitioners to assist them to provide  
36 better quality and more consistent information to their patients on the benefits and harms of  
37 screening for prostate cancer using the PSA test.<sup>18</sup>  
38  
39  
40  
41  
42  
43  
44  
45  
46

47 **Non-protocol Extension.** Compared with their 3-month follow-up scores, the men  
48 from the control group who completed the second community jury also subsequently  
49 increased their self-report score of how informed they considered themselves (mean score  
50 increased from 2.2 to 3.7), and decreased their future intention to be screened for prostate  
51 cancer (mean score decreased from 8 to 2.8).  
52  
53  
54  
55  
56  
57  
58  
59  
60

## Discussion

1  
2  
3  
4  
5 Compared with men who received standard information, participants in a 2-day  
6  
7 community jury considered themselves better informed about the benefits and harms of PSA  
8  
9 screening and reduced their stated intention to participate in screening in the future. Although  
10  
11 the process led to some men changing their minds about participating in PSA screening,  
12  
13 others said they would continue to be tested; highlighting the individual nature of this  
14  
15 decision and the need for informed consent.<sup>20</sup>  
16  
17

18  
19 Yet despite differences in the men's individual intentions to be screened for prostate  
20  
21 cancer, the group was unanimous in opposing any government-sponsored community  
22  
23 campaign. Our findings demonstrate the capacity of a community jury to consider complex  
24  
25 information on the harms and benefits of screening, and to distinguish individual from  
26  
27 community choices. This echoes the findings of a New Zealand community jury on  
28  
29 mammography screening<sup>13</sup> which also indicated that community juries are able to  
30  
31 differentiate between individual and public health needs.  
32  
33

34  
35 All deliberative democracy methods rely on engagement of those who have an interest  
36  
37 in the topic and agree to take part. The generalisability of our study findings may be limited  
38  
39 by the uncertain representativeness of a jury of volunteers from the Gold Coast, Australia,  
40  
41 who may be different in several ways to men in the wider Australian community. For  
42  
43 example, 88% of our participants had already had at least one PSA test, implying that prior to  
44  
45 the community jury they were more likely to be favorably disposed to PSA screening.  
46  
47

48  
49 The authors considered PSA screening an appropriate topic for engaging middle-aged  
50  
51 men because the data are equivocal and guidelines differ.<sup>2,7,8</sup> However, we also acknowledge  
52  
53 the limitations of these mass population studies. The median follow-ups of the ERSPC<sup>3</sup> and  
54  
55 PLCO<sup>4</sup> trials (13 and 11 years) are not sufficient to reliably address long-term prostate cancer  
56  
57 mortality and their respective methodologies have been criticised.<sup>21</sup> This limitation may have  
58  
59  
60

1  
2  
3 impacted the community jury decision. Nevertheless, this pilot study does illustrate the  
4  
5 potential of the community jury approach to instruct a cross section of men of different ages,  
6  
7 with different backgrounds, and educational levels.  
8

9  
10 Whether and how sampling and recruitment techniques affect community jury  
11  
12 outcomes are important research questions yet to be examined. Other important  
13  
14 methodological questions for community research include: what are the impacts on group  
15  
16 decisions of normative (conformity to group thinking) or informational (discussion of facts)  
17  
18 influences?<sup>22</sup> and when and how in the deliberation process do community jury participants  
19  
20 form their conclusions?  
21  
22

23 Our results have implications for clinical and public health practice. A large proportion  
24  
25 of men have not been engaged in an evidence-informed discussion of the potential benefits  
26  
27 and harms of screening prior to their physician ordering a PSA test<sup>23, 24</sup>; have not been asked  
28  
29 about their screening preferences prior to a PSA screening test<sup>25</sup>; and some doctors screen  
30  
31 without a discussion.<sup>26</sup> Alarming, a study conducted in the theatre waiting room in men  
32  
33 waiting to undergo a trans rectal ultrasound and prostate biopsy found 8% were unaware their  
34  
35 primary care provider had conducted a PSA screening test.<sup>27</sup> Current practice of PSA  
36  
37 screening in asymptomatic men is not standardised. Our findings reinforce the importance of  
38  
39 presenting the potential benefits and harms of PSA testing to men interested in being  
40  
41 screened, primarily because such information will lead some men to change their mind once  
42  
43 fully informed. When practitioners are faced with the difficult situation of being asked to  
44  
45 determine such a decision on behalf of their patient, in addition to considering their  
46  
47 individual patient's history, concerns, and priorities, it may be valuable to also have available  
48  
49 information about community attitudes and concerns regarding screening.<sup>20</sup>  
50  
51  
52  
53  
54  
55  
56  
57  
58  
59  
60



1  
2  
3 **Contributors** RT led the preparations and revisions of the manuscript, had full access to all  
4 of the data in the study and takes responsibility for the accuracy of the data analyses. PG and  
5  
6  
7 JD led the conception and design of the study, contributed to the interpretation of the data,  
8  
9  
10 and made substantial revisions to the manuscript. LR contributed to the study design and  
11  
12 made substantial revisions to the manuscript. GM and RG contributed to the study design,  
13  
14 interpretation of data and made significant revisions to the manuscript.  
15

16 We thank Jim Dickinson PhD FRACGP, Professor of Family Medicine, University of  
17  
18 Calgary, Canada for kindly providing his scientific expertise as our scientific advisor in the  
19  
20 community jury. He did not receive compensation for his contribution. We also thank Sir Iain  
21  
22 Chalmers DSc, James Lind Initiative, Oxford, UK for his helpful comments on an earlier  
23  
24 draft.  
25  
26

27 **Funding Support** This work was supported by a Bond University Vice Chancellor's  
28  
29 Research Grant Scheme, an Australian National Health and Medical Research Council  
30  
31 (NHMRC) Project Grant (#1023791), and a NHMRC Screening and Test Evaluation  
32  
33 Program (STEP) grant (#633033).  
34  
35

36 **Competing Interests** All authors have completed the ICMJE uniform disclosure form and  
37  
38 declare: RT, JD, PG, and GM received funding support from Bond University; RT, JD and  
39  
40 PG also received funding support from a NHMRC Program grant (#633033); LR received  
41  
42 funding support from a NHMRC funding grant (#1023197); no other relationships or  
43  
44 activities that could appear to have influenced the submitted work.  
45  
46

47 **Ethics Approval** The research project was approved by the Bond University Human  
48  
49 Research Ethics Committee (RO1570).  
50  
51

52 **Data Sharing Statement** In addition to the quantitative analysis reported in this paper, a  
53  
54 qualitative analysis of the jury deliberations and recommendations was conducted and  
55  
56  
57  
58  
59  
60

1  
2  
3 reported elsewhere and cited as reference 18. Additional data is available by emailing the first  
4  
5 author.  
6  
7  
8

### 9 10 **Figure Legends**

11  
12 Figure 1. Consort Flow-Chart of Participants (no legend)

13  
14 Figure 2. Future Intention-to-Screen Scores at Pre, Post, and Three Month Follow-up

15  
16 ○ — Community Jury Group;

17  
18 △ — Control Group  
19

20  
21 Foot note for Figure 2

22 Note: CJ=Community Jury group; M = mean score; p values based on ANCOVA analyses  
23 pre to post and pre to 3 month follow-up.  
24  
25  
26  
27  
28  
29  
30  
31  
32  
33  
34  
35  
36  
37  
38  
39  
40  
41  
42  
43  
44  
45  
46  
47  
48  
49  
50  
51  
52  
53  
54  
55  
56  
57  
58  
59  
60

## References

1. Katz MH. Can we stop ordering prostate-specific antigen screening tests? *JAMA Intern Med* 2013;173(10): 847-8.
2. Ilic D, Neuberger MM, Djulbegovic M, Dahm P. Screening for prostate cancer. The Cochrane Database of Syst Rev 2013;Issue 1. Art No.:CD004720. doi: 10.1002/14651858.CD004720.pub3.
3. Schröder FH, Hugosson J, Roobol MJ, Tammela TLJ, Ciatto S, Nelen V, et al. Prostate-Cancer Mortality at 11 Years of Follow-up. *N Engl J Med* 2012;366(11):981-90.
4. Andriole GL, Crawford ED, Grubb RL, 3rd, Buys SS, Chia D, Church TR, et al. Prostate cancer screening in the randomized Prostate, Lung, Colorectal, and Ovarian Cancer Screening Trial: mortality results after 13 years of follow-up. *J Natl Cancer Inst* 2012;104(2):125-32.
5. Moyer VA. Screening for Prostate Cancer: U.S. Preventive Services Task Force Recommendation Statement. *Ann Intern Med* 2012;157(2):120-34.
6. Carter HB, Albertsen PC, Barry MJ, Etzioni R, Freedland SJ, Greene KL, et al. Early detection of prostate cancer: AUA Guideline. *J Urol* 2013;190(2):419-26. doi:10.1016/j.juro.2013.04.119
7. Guidelines for preventive activities in general practice, 8th edn. East Melbourne: Royal Australian College of General Practitioners, 2012.
8. Urology Society of Australia and New Zealand PSA testing policy accessed April 2013 from [http://www.usanz.org.au/uploads/29168/ufiles/USANZ\\_2009\\_PSA\\_Testing\\_Policy\\_Final.pdf](http://www.usanz.org.au/uploads/29168/ufiles/USANZ_2009_PSA_Testing_Policy_Final.pdf).
9. Benbassat J, Pilpel D, Tidhar, M. Patients' preferences for participation in clinical decision making: A review of published studies. *Behav Med* 1998;2:81-88. doi: 10.1080/08964289809596384
10. Deber RB, Kraetschmer N, Urowitz S, Sharpe N. Do people want to be autonomous patients? Preferred roles in treatment decision-making in several patient populations. *Health Expect* 2007;10:248-258. doi: 10.1111/j.1369-7625.2007.00441.x
11. Carman KL, Heeringa JW, Heil SKR, Garfinkel S, Windham A, Gilmore D, Ginsburg M, Sofaer S, Gold M, Pathak-Sen E. The Use of Public Deliberation in Eliciting Public Input: Findings from a Literature Review. (Prepared by the American Institutes for Research Under Contract No. 290-02-0009.) AHRQ Publication No. 13-EHC070-EF. Rockville, MD: Agency for Healthcare Research and Quality; February 2013

- 1  
2  
3  
4  
5  
6  
7  
8  
9  
10  
11  
12  
13  
14  
15  
16  
17  
18  
19  
20  
21  
22  
23  
24  
25  
26  
27  
28  
29  
30  
31  
32  
33  
34  
35  
36  
37  
38  
39  
40  
41  
42  
43  
44  
45  
46  
47  
48  
49  
50  
51  
52  
53  
54  
55  
56  
57  
58  
59  
60
12. Abelson J, Eyles J, McLeod CB, Collins P, McMullan C, Forest PG. Does deliberation make a difference? Results from a citizens panel study of health goals priority setting. *Health Policy* 2003;66(1):95-106.
  13. Paul C, Nicholls R, Priest P, McGee R. Making policy decisions about population screening for breast cancer: The role of citizens' deliberation. *Health Policy* 2008;85(3):314-20.
  14. De Vries R, Stanczyk A, Wall IF, Uhlmann R, Damschroder LJ, Kim SY. Assessing the quality of democratic deliberation: A case study of public deliberation on the ethics of surrogate consent for research. *Soc Sci Med* 2010;70:1896-1903.  
doi:10.1016/j.socscimed.2010.02.031
  15. Parkin L, Paul C. Public good, personal privacy: a citizens' deliberation about using medical information for pharmacoepidemiological research. *J Epidemiol Community Health* 2011;65:150-156. doi:10.1136/jech.2009.097436
  16. Australian Cancer Council Factsheet: Early Detection of Prostate Cancer Accessed April 2013 from [http://www.cancer.org.au/content/pdf/Factsheets/Early\\_Detection\\_prostate-cancer-2013-revised.pdf](http://www.cancer.org.au/content/pdf/Factsheets/Early_Detection_prostate-cancer-2013-revised.pdf)
  17. Andrology Australia Factsheet: PSA testing Accessed April 2013 from [https://www.andrologyaustralia.org/wp-content/uploads/Factsheet\\_PSA-Test.pdf](https://www.andrologyaustralia.org/wp-content/uploads/Factsheet_PSA-Test.pdf)
  18. Rychetnik L, Doust J, Thomas R, Gardiner R, MacKenzie G, Glasziou P. A community jury on PSA screening: What do well-informed men want the government to do about prostate cancer screening? *BMJ Open* 2014;4:e004682. doi:10.1136/bmjopen-2013-004682
  19. Staw BM. The escalation of commitment to a course of action. *Academy of Management* 1981;6(4):577-87.
  20. Irwig L, Glasziou P. Informed consent for screening by community sampling. *Eff Clin Pract* 2000; 3(1):47-50.
  21. National Health and Medical Research Council (2013). *Prostate-Specific Antigen (PSA) testing in asymptomatic men: Evidence Evaluation Report*. Canberra: National Health and Medical Research Council.
  22. Kaplan MF, Miller CE. Group decision making and normative versus informational influence: Effects of type of issue and assigned decision rule. *J Personality and Social Psychology* 1987;53(2):306-13.

- 1  
2  
3 23. Chan ECY, Vernon SW, Ahn C, Greisinger A. Do men know that they have had a  
4 prostate specific antigen test? Accuracy of self-reports of testing at 2 sites *Am J Public*  
5 *Health* 2004;94(8):1336-8.  
6  
7  
8 24. Guerra CE, Jacobs SE, Holmes JH, Shea JA. Are physicians discussing prostate cancer  
9 screening with their patients and why or why not? A pilot study. *J Gen Intern Med*  
10 2007;22(7):901-7.  
11  
12 25. Hoffman RM, Couper MP, Zikmund-Fisher BJ, Levin CA, McNaughton-Collins M,  
13 Helitzer DL, VanHoewyk J, Barry MJ. Prostate cancer screening decisions. Results from  
14 the National Survey of Medical Decisions (DECISIONS Study). *Arch Intern Med*  
15 2009;169(17):1611-1618.  
16  
17  
18 26. Volk RJ, Linder SK, Kallen MA, Galliher JM, Spano MS, Mullen PD, Spann SJ.  
19 Primary care physicians' use of an informed decision-making process for prostate cancer  
20 screening. *Ann Fam Med* 2013;1:67-74.  
21  
22  
23 27. Pan D, McCahy P. Patient knowledge about prostate-specific antigen (PSA) and prostate  
24 cancer in Australia. *BJU Int* 2012: Sup 3:52-56  
25  
26  
27  
28  
29  
30  
31  
32  
33  
34  
35  
36  
37  
38  
39  
40  
41  
42  
43  
44  
45  
46  
47  
48  
49  
50  
51  
52  
53  
54  
55  
56  
57  
58  
59  
60

**Box 1.****Knowledge Questions from Surveys\* (answers considered correct highlighted)**

1. Is routine testing for prostate cancer recommended by RACGP Guidelines?

- Yes       No       Don't know

2. How accurate do *you* think the prostate specific antigen (PSA) blood test is for diagnosing prostate cancer?

- Reasonably accurate but some people *who do* have cancer can have a negative test result (false negative)

- Reasonably accurate but some people *who do not* have cancer can have an abnormal result (false positive)

- The PSA test is not always accurate because it can have both false positive or false negative results

- The PSA test is completely accurate

- Don't know

3. In terms of your knowledge about Prostate cancer, could you list some treatment options?

- No       Yes, please list

4. Could you list some potential side effects of treatments for prostate cancer?

- No       Yes, please list

---

\*There were originally six knowledge questions however the answers for two (one on prevalence and the other on mortality rates of prostate cancer) were incorrect and were deleted from analyses.

**Table 1. Participants Demographics**

|                                                                                |                     | Community<br>Jury<br>(n=12) | (SD/%) | Control<br>(n=14) | SD/%  |
|--------------------------------------------------------------------------------|---------------------|-----------------------------|--------|-------------------|-------|
| <i>Age</i>                                                                     |                     |                             |        |                   |       |
|                                                                                | Mean                | 61                          | (4.8)  | 62                | (4.9) |
| <i>Number previous PSA tests</i>                                               |                     |                             |        |                   |       |
|                                                                                | Mean                | 3.9                         | (3.6)  | 2.2*              | (1.8) |
| <i>Routine PSA testing saves lives</i>                                         |                     |                             |        |                   |       |
| Frequency                                                                      | yes                 | 7                           | (58%)  | 9                 | (64%) |
|                                                                                | no                  | 2                           | (17%)  | 2                 | (14%) |
|                                                                                | don't know          | 3                           | (25%)  | 3                 | (21%) |
| <i>Education</i>                                                               |                     |                             |        |                   |       |
| Frequency                                                                      | High school or less | 2                           | (17%)  | 4                 | (28%) |
|                                                                                | some uni or TAFE    | 4                           | (33%)  | 4                 | (28%) |
|                                                                                | uni/TAFE graduate   | 4                           | (33%)  | 1                 | (7%)  |
|                                                                                | uni postgrad        | 2                           | (17%)  | 5                 | (36%) |
| Note. * n=13, (1 missing); TAFE = Technical and Further Education Institutions |                     |                             |        |                   |       |

**Table 2. Where do Men Receive Information about Testing for Prostate Cancer? (N=26)**

|                                              | Agree | (%)  |
|----------------------------------------------|-------|------|
| I don't look for information                 | 3     | (12) |
| Family and friends                           | 11    | (42) |
| Internet                                     | 10    | (38) |
| Media                                        | 9     | (35) |
| General practitioner                         | 17    | (65) |
| Urologist/specialist/hospital                | 5     | (20) |
| Note: men could endorse more than one source |       |      |

**Table 3. Linear Regression Analysis Predicting Future Intention-to-Screen for Prostate Cancer**

|                                          | <i>Coefficient</i> | <i>SE B</i> | CI<br>Lower | CI<br>Upper | <i>p</i> |
|------------------------------------------|--------------------|-------------|-------------|-------------|----------|
| Constant                                 | -0.16              | 1.69        | -3.66       | 3.35        | 0.93     |
| Pre-assessment intention-to-screen score | 0.74               | 0.18        | 0.36        | 1.11        | 0.001    |
| Number of previous PSA tests             | 0.63               | 0.22        | 0.18        | 1.07        | 0.008    |
| Group (Community Jury/Control)           | -3.69              | 1.19        | -6.16       | -1.21       | 0.005    |

Note. N=25; CI= confidence interval;  
These data are slightly different to Rychetnik et al (2014) analyses as they are based on intention-to-treat.

**Table 4. Changes in Men's Knowledge Scores from Pre-to Post-assessment**

|                                          |                | Wrong to Right |      | Right to Right |      | Right to Wrong |     | Wrong to Wrong |      | <i>p</i> |
|------------------------------------------|----------------|----------------|------|----------------|------|----------------|-----|----------------|------|----------|
|                                          |                | n              | (%)  | n              | (%)  | n              | (%) | n              | (%)  |          |
| Recommended by guidelines?               | community jury | 4              | (42) | 3              | (25) | 1              | (8) | 3              | (25) | 0.08     |
|                                          | control*       | 1              | (8)  | 1              | (8)  | 1              | (8) | 10             | (77) |          |
|                                          |                |                |      |                |      |                |     |                |      |          |
| how accurate is the PSA test?            | community jury | 6              | (50) | 4              | (33) | 1              | (8) | 1              | (8)  | 0.03     |
|                                          | control        | 2              | (14) | 9              | (64) | 0              | (0) | 3              | (21) |          |
|                                          |                |                |      |                |      |                |     |                |      |          |
| list possible treatment options          | community jury | 2              | (17) | 7              | (58) | 0              | (0) | 2              | (17) | 0.6      |
|                                          | control        | 3              | (21) | 7              | (50) | 0              | (0) | 4              | (27) |          |
|                                          |                |                |      |                |      |                |     |                |      |          |
| list possible side effects of treatments | community jury | 3              | (25) | 7              | (58) | 0              | (0) | 2              | (17) | 0.6      |
|                                          | control        | 3              | (21) | 7              | (50) | 0              | (0) | 4              | (27) |          |
|                                          |                |                |      |                |      |                |     |                |      |          |

Note: \*n=13 (1 missing)



**Table 5. Changes in Men's Knowledge Scores Post- to Follow-up Assessment**

|                               |                | Wrong to Right |      | Right to Right |      | Right to Wrong |      | Wrong to Wrong |      | <i>p</i> |
|-------------------------------|----------------|----------------|------|----------------|------|----------------|------|----------------|------|----------|
|                               |                | n              | (%)  | n              | (%)  | n              | (%)  | n              | (%)  |          |
| Recommended by guidelines?    | community jury | 0              | (0)  | 7              | (58) | 1              | (8)  | 4              | (33) | 0.7      |
|                               | control*       | 0              | (0)  | 1              | (7)  | 1              | (7)  | 11             | (85) |          |
| how accurate is the PSA test? | community jury | 0              | (0)  | 10             | (83) | 0              | (0)  | 2              | (17) | 0.1      |
|                               | control        | 2              | (14) | 9              | (64) | 2              | (14) | 1              | (7)  |          |

Note: \*n=13 (1 missing)

**Title Page**

Deliberative democracy and cancer screening consent: a randomised control trial of the effect of a community jury on men's knowledge about and intentions to participate in PSA screening.

**Authors**

Rae Thomas<sup>1</sup>  
Paul Glasziou<sup>1</sup>  
Lucie Rychetnik<sup>2</sup>  
Geraldine Mackenzie<sup>3</sup>  
Robert Gardiner<sup>4</sup>  
Jenny Doust<sup>1</sup>

<sup>1</sup>Centre for Research in Evidence-Based Practice (CREBP), Faculty of Health Sciences and Medicine, Bond University, Queensland, Australia

<sup>2</sup>School of Medicine, University of Notre Dame, Sydney, NSW, Australia and School of Public Health, University of Sydney, NSW, Australia

<sup>3</sup>Faculty of Law, Bond University, Queensland, Australia

<sup>4</sup>University of Queensland Centre for Clinical Research & Department of Urology, Royal Brisbane & Women's Hospital, Queensland, Australia

Abstract word count: 298

Manuscript word count: 2685

Corresponding Author:

Rae Thomas

Centre for Research in Evidence-Based Practice (CREBP), Faculty of Health Sciences and Medicine, Bond University, Queensland, Australia

Tel: +617 55955521

Fax +617 55951271

Email [rthomas@bond.edu.au](mailto:rthomas@bond.edu.au)

**Abstract**

**Objective** Prostate-specific antigen (PSA) screening is controversial. A community jury allows presentation of complex information and may clarify how participants view screening after being well-informed of the benefits and harms. We examined whether participating in a community jury had an effect on men's knowledge about and their intention to participate in PSA screening.

**Design** Random allocation to either a 2-day community jury or control group, with pre- post- and three-month follow-up.

**Setting** Participants from the Gold Coast (Australia) recruited via radio, newspaper, and community meetings.

**Participants** Twenty-six men aged 50-70 years with no previous diagnosis of prostate cancer.

**Intervention** The control group (n= 14) received factsheets on PSA screening. Community jury participants (n= 12) received the same factsheets and further information about screening for prostate cancer. In addition, three experts presented information on PSA screening: a neutral scientific adviser provided background information, one expert emphasised the potential benefits of screening, and another expert emphasised the potential harms.

Participants discussed information, asked questions of the experts and deliberated on personal and policy decisions.

**Main Outcome and Measures** Our primary outcome was change in individual intention to have a PSA screening test. We also assessed knowledge about screening for prostate cancer.

**Results** Analyses were conducted using intention-to-treat. Immediately after the jury, the community jury group had less intention-to-screen for prostate cancer than men in the control group (effect size = -0.6SD,  $p=0.05$ ). This was sustained at three-month follow-up.

Community jury men also correctly identified PSA test accuracy and considered themselves more informed (effect size 1.2SD,  $p < 0.001$ ).

**Conclusions** Evidence-informed deliberation of harms and benefits of PSA screening effects men's individual choice to be screened for prostate cancer. Community juries may be a valid method for eliciting target group input to policy decisions.

**Trial Registration** Australian and New Zealand Clinical Trials Registry  
(ACTRN12612001079831)

#### **Strengths and limitations of this study**

- This is the first study to use scientific methods to evaluate the effect of a community jury on an individual's knowledge and decisions.
- Participants in community juries make value-based decisions from complex information and can differentiate individual from community choices.
- Expert presentations were based on large population studies that have limitations.
- The sample size of this study was small, but the results were clear and sustained.
- How sampling, recruitment techniques, and group processes affect community jury outcomes are yet to be examined.

## Introduction

Screening for prostate cancer by prostate-specific antigen (PSA) testing is controversial<sup>1</sup> and the benefits and harms of screening are uncertain.<sup>2</sup> The results of two large randomised controlled trials of population screening (the ERSPC trial in Europe<sup>3</sup> and the PLCO trial in the United States<sup>4</sup>) were much anticipated, but the differing methods and results have led to conflicting interpretations and recommendations from expert groups.<sup>5,6</sup> Given the uncertainty, most guidelines recommend that men should be fully informed of the potential advantages and disadvantages of screening prior to having a PSA test.<sup>5,7,8</sup> Although individuals vary in the degree to which they want to engage with the evidence about their health concerns, a majority consistently report an interest in sharing health care decisions with their treating doctor.<sup>9,10</sup> However, providing the complex information relevant to men who are interested in PSA screening remains challenging.

Citizens' deliberation methodologies, such as community juries can facilitate the communication of complex evidence and aim to elicit 'informed' community perspectives for the purpose of guiding services and public policy. A range of community jury processes have been described, but the common features are i) participants are drawn from the lay public; ii) the jury deliberates on a question requiring an ethics or values-based decision (as opposed to a problem requiring a technical solution); iii) the jury is provided with information on the relevant issues and possible positions from expert "witnesses", with the opportunity to ask them questions; and iv) the jury then engages in a deliberation phase with participants discussing their preferences, opinions, values and positions, and attempt to reach a consensus position.<sup>11</sup>

Community juries have been conducted on topics such as public health priorities,<sup>12</sup> mammography screening,<sup>13</sup> and health research.<sup>14,15</sup> A recent review of deliberation methodologies found only four unique studies that compared deliberative methodologies with

1  
2  
3 a control group; only two of these were in relation to health topics.<sup>11</sup> While theoretically  
4  
5 sound,<sup>11</sup> community juries are a resource-intensive process and it is uncertain whether the  
6  
7 views of those participating are better “informed” than those of a public provided with  
8  
9 reading material on the same topic. It is also unclear whether and how being informed  
10  
11 influences a jury’s conclusions. If community juries are to be used to inform screening  
12  
13 policy, it is essential to understand the capacity of a community jury process to support  
14  
15 better-informed conclusions by its participants.  
16  
17

18  
19 The aim of this study was to examine the degree to which participants of a community  
20  
21 jury on PSA screening of asymptomatic men were better “informed” than other citizens and,  
22  
23 based on the ERSPC<sup>3</sup> and PLCO<sup>4</sup> trials together with the general practice guidelines, whether  
24  
25 evidence-informed deliberations of the benefits and harms of PSA screening impact on men’s  
26  
27 intention to be screen for prostate cancer. We conducted a randomised controlled trial that  
28  
29 compared a community jury with men allocated to receive typical information. As part of the  
30  
31 community jury process, men were also asked to deliberate on two community focused  
32  
33 questions:  
34

- 35  
36 • Should government campaigns be provided (on PSA screening) and if so, what  
37  
38 information should be included in those campaigns?
- 39  
40 • What do you as a group of men think about a government organised invitation  
41  
42 program for testing for prostate cancer?  
43  
44

45  
46 This is the first randomised controlled trial of a deliberative democracy process on the topic  
47  
48 of PSA screening.  
49

## 50 51 52 **Method**

53  
54 We recruited men in the target age group of 50 to 70 years from the Gold Coast region  
55  
56 (Australia) who had no previous diagnosis of prostate cancer, using media advertisements,  
57  
58  
59  
60

1  
2  
3 radio interviews, and community groups. Men with a family history of prostate cancer were  
4  
5 not excluded from participating. Eligible and available respondents attended a session on a  
6  
7 Friday evening to receive a full briefing on the study; all agreed to participate and completed  
8  
9 a consent form, before being randomly allocated to either a community jury group or a  
10  
11 control group (Figure 1). Random allocation occurred by each man selecting a piece of paper  
12  
13 with the name of either group from an opaque container. The research project was approved  
14  
15 by the Bond University Human Research Ethics Committee (R01570) and the protocol  
16  
17 registered with the Australian and New Zealand Clinical Trials Registry  
18  
19 (ACTRN12612001079831).  
20  
21  
22

23 All men were given standard PSA fact sheets from the Cancer Council Australia and  
24  
25 Andrology Australia.<sup>16,17</sup> In addition to the factsheets, men in the community jury group also  
26  
27 received a Cochrane Collaboration plain language statement,<sup>2</sup> information from the Royal  
28  
29 Australian College of General Practitioners' Guidelines for "Preventive Activities in General  
30  
31 Practice" pertaining to screening for prostate cancer,<sup>7</sup> and the Executive Summary of "PSA  
32  
33 Testing" from the Urology Society of Australia and New Zealand.<sup>8</sup> Men in both groups  
34  
35 received \$20 gift cards as reimbursement for their time at the introductory session and for  
36  
37 each survey. The community jury group received an \$80 gift card as reimbursement for  
38  
39 attending the community jury weekend. Men in the control group were given a follow-up  
40  
41 survey with a return stamped envelope to be mailed after the weekend.  
42  
43  
44

45 The community jury weekend and a qualitative analysis of the jury deliberations have  
46  
47 been described in detail elsewhere.<sup>18</sup> In brief, the community jury consisted of an iterative  
48  
49 process of education and deliberation. Three experts presented to the community jury on day  
50  
51 one: a neutral scientific advisor discussed medical information regarding the role of the  
52  
53 prostate, screening tests (including PSA and Digital Rectal Examination), explanations about  
54  
55 changes to PSA levels, how cancer is detected, and treatment options and potential outcomes  
56  
57  
58  
59  
60

1  
2  
3 (Jim Dickinson, Professor of Family Medicine, University of Calgary). Two further experts  
4  
5 (a urologist and expert in prostate cancer (author RG) and an expert in evidence-based  
6  
7 medicine (author PG) presented the benefits and harms of being screened for prostate cancer.  
8  
9 Although both speakers aimed to give balanced presentations, one emphasised the benefits of  
10  
11 PSA screening, in particular selective screening, (RG <http://youtu.be/9vPt3NAcG8g>) and the  
12  
13 other the harms (PG <http://youtu.be/nifkjdZKmsU>). Both presentations focused on the  
14  
15 evidence from the two trials of PSA population screening. However, both presenters also  
16  
17 made reference to lower levels of evidence relating to the risks of metastases if a cancer  
18  
19 remains undetected due to a lack of screening and the consequences of treating localised  
20  
21 disease detected during screening. After each presentation, men were able to deliberate on the  
22  
23 information and could ask the experts any questions. The men reflected on the information  
24  
25 overnight and returned on Sunday to deliberate and discuss the information presented the day  
26  
27 before, including asking any further questions of the expert witnesses by phone.  
28  
29  
30  
31

32 A nominal group technique was used on both days to elicit individual thoughts prior to  
33  
34 group deliberations. After the final deliberations on Sunday, including the community level  
35  
36 decisions, the men in the community jury completed the post-assessment survey. Men in the  
37  
38 control group were contacted on the Monday and either completed the post-assessment  
39  
40 survey by phone or mailed the survey back to researchers the same week. Three months after  
41  
42 the community jury weekend, all men in both groups were re-contacted and completed a  
43  
44 follow-up survey.  
45  
46

### 47 **Non-protocol Extension**

48  
49 Because they indicated a strong desire to have the experience of the community jury  
50  
51 weekend, after their three-month follow-up survey the control group was offered the same  
52  
53 community jury experience. Six of the 14 men randomised to the control group participated  
54  
55 in the second community jury (Figure 1). The two primary experts were the same as for the  
56  
57  
58  
59  
60



1  
2  
3 original community jury group, however, the scientific advisor was changed to a female  
4  
5 general practitioner and professor of clinical epidemiology (author JD). A final post-jury  
6  
7 survey was conducted with the second community jury.  
8

### 9 10 **Measures**

11  
12 We collected demographic information, history of previous PSA testing and  
13  
14 information sources for PSA screening at the introductory session. In each of the three  
15  
16 surveys, men were asked to nominate on a scale 0 to 10 (0 = *not at all*, 5 = *maybe*, and 10 =  
17  
18 *absolutely*), whether they intended, while symptomless, to undergo PSA screening for  
19  
20 prostate cancer in the future. They were also asked to nominate how informed they  
21  
22 considered themselves in relation to the harms and benefits of screening for prostate cancer  
23  
24 on a scale 0 to 4 (0 = *not at all* and 4 = *very*). We asked four knowledge questions in each  
25  
26 survey that assessed a) the men's knowledge about the recommendation on PSA screening in  
27  
28 the Australian general practice guidelines,<sup>7</sup> b) the accuracy of the PSA test and c) two  
29  
30 questions about treatment options and side-effects of prostate cancer treatment (Box 1).  
31  
32 Australia has a primary care based system, requiring a referral from a general practitioner to  
33  
34 see a urologist. General practitioners are therefore responsible for the majority of the PSA  
35  
36 screening tests requested in Australia. For this reason, we were interested in the participants'  
37  
38 knowledge of current general practice guidelines.  
39  
40  
41  
42

### 43 **Statistical Analyses**

44  
45 Pre- to post-, and post- to follow-up assessment differences between the groups were  
46  
47 examined with ANCOVA and Fisher's exact test. It was anticipated that the number of PSA  
48  
49 tests previously undertaken would impact on a man's future decision to be screened for  
50  
51 prostate cancer with the PSA test.<sup>19</sup> Therefore we conducted the analyses with adjustment for  
52  
53 baseline intention-to-screen and the number of times a man had already received a PSA test.  
54  
55  
56  
57  
58  
59  
60

1  
2  
3 Unadjusted post-assessment analyses were conducted using an independent t-test. All  
4  
5 analyses were conducted on an intention-to-treat basis.  
6  
7  
8

## 9 10 **Results**

### 11 **Participant Demographics**

12  
13  
14 Of the 59 men who contacted the research team, 27 respondents were available on the set  
15  
16 date and elected to participate in the study. One man was excluded post-randomisation as his  
17  
18 age exceeded the limit of the study (see Figure 1). Participating men's ages ranged between  
19  
20 53 and 70 years (average 62 years,  $SD = 4.8$ ). Further demographic information is described  
21  
22 in Table 1. There was no loss to follow up during the course of the study. The groups were  
23  
24 similar at baseline in age, number of times previously screened for prostate cancer, and  
25  
26 whether they intended to be screened for prostate cancer in the future. All but 3 men had  
27  
28 previously had a PSA test; 14 had been tested 2 or 3 times, 4 on one occasion, two 6 times,  
29  
30 and 3 men had been tested on 7, 8, and 12 occasions each. No men had undergone a biopsy.  
31  
32 At pre-assessment, the majority of men (16/26, 62%) agreed with the statement that routine  
33  
34 screening for prostate cancer saved lives, whereas 4 (15%) disagreed and 6 (23%) did not  
35  
36 know (Table 1). The men reported a variety of sources for how they accessed information  
37  
38 about prostate cancer screening, with the most common source of information being their  
39  
40 general practitioner (Table 2).  
41  
42  
43  
44

### 45 **Changes in Intention-to-Screen and Individual Knowledge**

46  
47 **Pre-to post-intervention.** At post-assessment, men in the community jury group had  
48  
49 significantly less intention-to-screen for prostate cancer on the 0 to 10 scale than men in the  
50  
51 control group (median score 2.5 and 7.0, Effect Size=  $-0.6SD$ ,  $p=0.05$ ). When we adjusted  
52  
53 for baseline intention to be screened for prostate cancer and the number of prior PSA tests,  
54  
55  
56  
57  
58  
59  
60

1  
2  
3 the mean difference was 3.7 ( $p=.005$ , Table 3). The unadjusted mean difference between the  
4  
5 groups was 2.7 (Figure 2).  
6

7 After completion of the community jury weekend, men in the jury group considered  
8 themselves more informed about screening for prostate cancer than the control group (median  
9 score 4.0 and 2.0, mean difference = 1.7, Effect Size=1.2SD,  $p<0.001$ ). Compared with the  
10 control group, the community jury group was more likely to correctly identify that the PSA  
11 test was not always accurate in indicating the likelihood of prostate cancer as it had both false  
12 positive and false negative results ( $p=0.03$ , Table 4).  
13  
14  
15  
16  
17  
18  
19

20 **Post-to 3 month follow-up assessment.** The influence of the community jury  
21 experience was sustained at 3 months: men in the community jury group maintained their  
22 intention-to-screen score at 3 months (Figure 2) whereas there was a slight increase in the  
23 control group's future intention-to-screen for prostate cancer. There was no further change in  
24 knowledge (Table 5).  
25  
26  
27  
28  
29  
30

### 31 **Community Level Questions**

32 Men in the community jury voted unanimously (12/12) against a government campaign  
33 targeting the public about PSA screening for prostate cancer, and against a government  
34 organised invitation program. Unprompted, the jury members instead suggested the  
35 government provide a campaign that targeted general practitioners to assist them to provide  
36 better quality and more consistent information to their patients on the benefits and harms of  
37 screening for prostate cancer using the PSA test.<sup>18</sup>  
38  
39  
40  
41  
42  
43  
44  
45  
46

47 **Non-protocol Extension.** Compared with their 3-month follow-up scores, the men  
48 from the control group who completed the second community jury also subsequently  
49 increased their self-report score of how informed they considered themselves (mean score  
50 increased from 2.2 to 3.7), and decreased their future intention to be screened for prostate  
51 cancer (mean score decreased from 8 to 2.8).  
52  
53  
54  
55  
56  
57  
58  
59  
60

## Discussion

1  
2  
3  
4  
5 Compared with men who received standard information, participants in a 2-day  
6  
7 community jury considered themselves better informed about the benefits and harms of PSA  
8  
9 screening and reduced their stated intention to participate in screening in the future. Although  
10  
11 the process led to some men changing their minds about participating in PSA screening,  
12  
13 others said they would continue to be tested; highlighting the individual nature of this  
14  
15 decision and the need for informed consent.<sup>20</sup>  
16  
17

18  
19 Yet despite differences in the men's individual intentions to be screened for prostate  
20  
21 cancer, the group was unanimous in opposing any government-sponsored community  
22  
23 campaign. Our findings demonstrate the capacity of a community jury to consider complex  
24  
25 information on the harms and benefits of screening, and to distinguish individual from  
26  
27 community choices. This echoes the findings of a New Zealand community jury on  
28  
29 mammography screening<sup>13</sup> which also indicated that community juries are able to  
30  
31 differentiate between individual and public health needs.  
32  
33

34  
35 All deliberative democracy methods rely on engagement of those who have an interest  
36  
37 in the topic and agree to take part. The generalisability of our study findings may be limited  
38  
39 by the uncertain representativeness of a jury of volunteers from the Gold Coast, Australia,  
40  
41 who may be different in several ways to men in the wider Australian community. For  
42  
43 example, 88% of our participants had already had at least one PSA test, implying that prior to  
44  
45 the community jury they were more likely to be favorably disposed to PSA screening.  
46  
47

48  
49 The authors considered PSA screening an appropriate topic for engaging middle-aged  
50  
51 men because the data are equivocal and guidelines differ.<sup>2,7,8</sup> However, we also acknowledge  
52  
53 the limitations of these mass population studies. The median follow-ups of the ERSPC<sup>3</sup> and  
54  
55 PLCO<sup>4</sup> trials (13 and 11 years) are not sufficient to reliably address long-term prostate cancer  
56  
57 mortality and their respective methodologies have been criticised.<sup>21</sup> This limitation may have  
58  
59  
60

1  
2  
3 impacted the community jury decision. Nevertheless, this pilot study does illustrate the  
4  
5 potential of the community jury approach to instruct a cross section of men of different ages,  
6  
7 with different backgrounds, and educational levels.  
8

9  
10 Whether and how sampling and recruitment techniques affect community jury  
11  
12 outcomes are important research questions yet to be examined. Other important  
13  
14 methodological questions for community research include: what are the impacts on group  
15  
16 decisions of normative (conformity to group thinking) or informational (discussion of facts)  
17  
18 influences?<sup>22</sup> and when and how in the deliberation process do community jury participants  
19  
20 form their conclusions?  
21  
22

23  
24 Our results have implications for clinical and public health practice. A large proportion  
25  
26 of men have not been engaged in an evidence-informed discussion of the potential benefits  
27  
28 and harms of screening prior to their physician ordering a PSA test<sup>23, 24</sup>; have not been asked  
29  
30 about their screening preferences prior to a PSA screening test<sup>25</sup>; and some doctors screen  
31  
32 without a discussion.<sup>26</sup> Alarming, a study conducted in the theatre waiting room in men  
33  
34 waiting to undergo a trans rectal ultrasound and prostate biopsy found 8% were unaware their  
35  
36 primary care provider had conducted a PSA screening test.<sup>27</sup> Current practice of PSA  
37  
38 screening in asymptomatic men is not standardised. Our findings reinforce the importance of  
39  
40 presenting the potential benefits and harms of PSA testing to men interested in being  
41  
42 screened, primarily because such information will lead some men to change their mind once  
43  
44 fully informed. When practitioners are faced with the difficult situation of being asked to  
45  
46 determine such a decision on behalf of their patient, in addition to considering their  
47  
48 individual patient's history, concerns, and priorities, it may be valuable to also have available  
49  
50 information about community attitudes and concerns regarding screening.<sup>20</sup>  
51  
52  
53  
54  
55  
56  
57  
58  
59  
60

1  
2  
3 **Contributors** RT led the preparations and revisions of the manuscript, had full access to all  
4 of the data in the study and takes responsibility for the accuracy of the data analyses. PG and  
5  
6  
7 JD led the conception and design of the study, contributed to the interpretation of the data,  
8  
9  
10 and made substantial revisions to the manuscript. LR contributed to the study design and  
11  
12 made substantial revisions to the manuscript. GM and RG contributed to the study design,  
13  
14 interpretation of data and made significant revisions to the manuscript.  
15

16 We thank Jim Dickinson PhD FRACGP, Professor of Family Medicine, University of  
17  
18 Calgary, Canada for kindly providing his scientific expertise as our scientific advisor in the  
19  
20 community jury. He did not receive compensation for his contribution. We also thank Sir Iain  
21  
22 Chalmers DSc, James Lind Initiative, Oxford, UK for his helpful comments on an earlier  
23  
24 draft.  
25  
26

27 **Funding Support** This work was supported by a Bond University Vice Chancellor's  
28  
29 Research Grant Scheme, an Australian National Health and Medical Research Council  
30  
31 (NHMRC) Project Grant (#1023791), and a NHMRC Screening and Test Evaluation  
32  
33 Program (STEP) grant (#633033).  
34  
35

36 **Competing Interests** All authors have completed the ICMJE uniform disclosure form and  
37  
38 declare: RT, JD, PG, and GM received funding support from Bond University; RT, JD and  
39  
40 PG also received funding support from a NHMRC Program grant (#633033); LR received  
41  
42 funding support from a NHMRC funding grant (#1023197); no other relationships or  
43  
44 activities that could appear to have influenced the submitted work.  
45  
46

47 **Ethics Approval** The research project was approved by the Bond University Human  
48  
49 Research Ethics Committee (RO1570).  
50  
51

52 **Data Sharing Statement** In addition to the quantitative analysis reported in this paper, a  
53  
54 qualitative analysis of the jury deliberations and recommendations was conducted and  
55  
56  
57  
58  
59  
60

1  
2  
3 reported elsewhere and cited as reference 18. Additional data is available by emailing the first  
4  
5 author.  
6  
7  
8

### 9 10 **Figure Legends**

11  
12 Figure 1. Consort Flow-Chart of Participants (no legend)

13  
14 Figure 2. Future Intention-to-Screen Scores at Pre, Post, and Three Month Follow-up

15  
16 ○ — Community Jury Group;  
17  
18 △ — Control Group  
19

20  
21 Foot note for Figure 2

22 Note: CJ=Community Jury group; M = mean score; p values based on ANCOVA analyses  
23 pre to post and pre to 3 month follow-up.  
24  
25  
26  
27  
28  
29  
30  
31  
32  
33  
34  
35  
36  
37  
38  
39  
40  
41  
42  
43  
44  
45  
46  
47  
48  
49  
50  
51  
52  
53  
54  
55  
56  
57  
58  
59  
60

### References

1. Katz MH. Can we stop ordering prostate-specific antigen screening tests? *JAMA Intern Med* 2013;173(10): 847-8.
2. Ilic D, Neuberger MM, Djulbegovic M, Dahm P. Screening for prostate cancer. The Cochrane Database of Syst Rev 2013;Issue 1. Art No.:CD004720. doi: 10.1002/14651858.CD004720.pub3.
3. Schröder FH, Hugosson J, Roobol MJ, Tammela TLJ, Ciatto S, Nelen V, et al. Prostate-Cancer Mortality at 11 Years of Follow-up. *N Engl J Med* 2012;366(11):981-90.
4. Andriole GL, Crawford ED, Grubb RL, 3rd, Buys SS, Chia D, Church TR, et al. Prostate cancer screening in the randomized Prostate, Lung, Colorectal, and Ovarian Cancer Screening Trial: mortality results after 13 years of follow-up. *J Natl Cancer Inst* 2012;104(2):125-32.
5. Moyer VA. Screening for Prostate Cancer: U.S. Preventive Services Task Force Recommendation Statement. *Ann Intern Med* 2012;157(2):120-34.
6. Carter HB, Albertsen PC, Barry MJ, Etzioni R, Freedland SJ, Greene KL, et al. Early detection of prostate cancer: AUA Guideline. *J Urol* 2013;190(2):419-26. doi:10.1016/j.juro.2013.04.119
7. Guidelines for preventive activities in general practice, 8th edn. East Melbourne: Royal Australian College of General Practitioners, 2012.
8. Urology Society of Australia and New Zealand PSA testing policy accessed April 2013 from [http://www.usanz.org.au/uploads/29168/ufiles/USANZ\\_2009\\_PSA\\_Testing\\_Policy\\_Final.pdf](http://www.usanz.org.au/uploads/29168/ufiles/USANZ_2009_PSA_Testing_Policy_Final.pdf).
9. Benbassat J, Pilpel D, Tidhar, M. Patients' preferences for participation in clinical decision making: A review of published studies. *Behav Med* 1998;2:81-88. doi: 10.1080/08964289809596384
10. Deber RB, Kraetschmer N, Urowitz S, Sharpe N. Do people want to be autonomous patients? Preferred roles in treatment decision-making in several patient populations. *Health Expect* 2007;10:248-258. doi: 10.1111/j.1369-7625.2007.00441.x
11. Carman KL, Heeringa JW, Heil SKR, Garfinkel S, Windham A, Gilmore D, Ginsburg M, Sofaer S, Gold M, Pathak-Sen E. The Use of Public Deliberation in Eliciting Public Input: Findings from a Literature Review. (Prepared by the American Institutes for Research Under Contract No. 290-02-0009.) AHRQ Publication No. 13-EHC070-EF. Rockville, MD: Agency for Healthcare Research and Quality; February 2013



12. Abelson J, Eyles J, McLeod CB, Collins P, McMullan C, Forest PG. Does deliberation make a difference? Results from a citizens panel study of health goals priority setting. *Health Policy* 2003;66(1):95-106.
13. Paul C, Nicholls R, Priest P, McGee R. Making policy decisions about population screening for breast cancer: The role of citizens' deliberation. *Health Policy* 2008;85(3):314-20.
14. De Vries R, Stanczyk A, Wall IF, Uhlmann R, Damschroder LJ, Kim SY. Assessing the quality of democratic deliberation: A case study of public deliberation on the ethics of surrogate consent for research. *Soc Sci Med* 2010;70:1896-1903.  
doi:10.1016/j.socscimed.2010.02.031
15. Parkin L, Paul C. Public good, personal privacy: a citizens' deliberation about using medical information for pharmacoepidemiological research. *J Epidemiol Community Health* 2011;65:150-156. doi:10.1136/jech.2009.097436
16. Australian Cancer Council Factsheet: Early Detection of Prostate Cancer Accessed April 2013 from [http://www.cancer.org.au/content/pdf/Factsheets/Early\\_Detection\\_prostate-cancer-2013-revised.pdf](http://www.cancer.org.au/content/pdf/Factsheets/Early_Detection_prostate-cancer-2013-revised.pdf)
17. Andrology Australia Factsheet: PSA testing Accessed April 2013 from [https://www.andrologyaustralia.org/wp-content/uploads/Factsheet\\_PSA-Test.pdf](https://www.andrologyaustralia.org/wp-content/uploads/Factsheet_PSA-Test.pdf)
18. Rychetnik L, Doust J, Thomas R, Gardiner R, MacKenzie G, Glasziou P. A community jury on PSA screening: What do well-informed men want the government to do about prostate cancer screening? *BMJ Open* 2014;4:e004682. doi:10.1136/bmjopen-2013-004682
19. Staw BM. The escalation of commitment to a course of action. *Academy of Management* 1981;6(4):577-87.
20. Irwig L, Glasziou P. Informed consent for screening by community sampling. *Eff Clin Pract* 2000; 3(1):47-50.
21. National Health and Medical Research Council (2013). *Prostate-Specific Antigen (PSA) testing in asymptomatic men: Evidence Evaluation Report*. Canberra: National Health and Medical Research Council.
22. Kaplan MF, Miller CE. Group decision making and normative versus informational influence: Effects of type of issue and assigned decision rule. *J Personality and Social Psychology* 1987;53(2):306-13.

- 1  
2  
3  
4  
5  
6  
7  
8  
9  
10  
11  
12  
13  
14  
15  
16  
17  
18  
19  
20  
21  
22  
23  
24  
25  
26  
27  
28  
29  
30  
31  
32  
33  
34  
35  
36  
37  
38  
39  
40  
41  
42  
43  
44  
45  
46  
47  
48  
49  
50  
51  
52  
53  
54  
55  
56  
57  
58  
59  
60
23. Chan ECY, Vernon SW, Ahn C, Greisinger A. Do men know that they have had a prostate specific antigen test? Accuracy of self-reports of testing at 2 sites *Am J Public Health* 2004;94(8):1336-8.
24. Guerra CE, Jacobs SE, Holmes JH, Shea JA. Are physicians discussing prostate cancer screening with their patients and why or why not? A pilot study. *J Gen Intern Med* 2007;22(7):901-7.
25. Hoffman RM, Couper MP, Zikmund-Fisher BJ, Levin CA, McNaughton-Collins M, Helitzer DL, VanHoewyk J, Barry MJ. Prostate cancer screening decisions. Results from the National Survey of Medical Decisions (DECISIONS Study). *Arch Intern Med* 2009;169(17):1611-1618.
26. Volk RJ, Linder SK, Kallen MA, Galliher JM, Spano MS, Mullen PD, Spann SJ. Primary care physicians' use of an informed decision-making process for prostate cancer screening. *Ann Fam Med* 2013;1:67-74.
27. Pan D, McCahy P. Patient knowledge about prostate-specific antigen (PSA) and prostate cancer in Australia. *BJU Int* 2012: Sup 3:52-56

**Box 1.****Knowledge Questions from Surveys\* (answers considered correct highlighted)**

1. Is routine testing for prostate cancer recommended by RACGP Guidelines?

- Yes       No       Don't know

2. How accurate do *you* think the prostate specific antigen (PSA) blood test is for diagnosing prostate cancer?

- Reasonably accurate but some people *who do* have cancer can have a negative test result (false negative)
- Reasonably accurate but some people *who do not* have cancer can have an abnormal result (false positive)
- The PSA test is not always accurate because it can have both false positive or false negative results
- The PSA test is completely accurate
- Don't know

3. In terms of your knowledge about Prostate cancer, could you list some treatment options?

- No       Yes, please list

4. Could you list some potential side effects of treatments for prostate cancer?

- No       Yes, please list

---

\*There were originally six knowledge questions however the answers for two (one on prevalence and the other on mortality rates of prostate cancer) were incorrect and were deleted from analyses.

**Table 1. Participants Demographics**

|                                                                                |                     | Community<br>Jury<br>(n=12) | (SD/%) | Control<br>(n=14) | SD/%  |
|--------------------------------------------------------------------------------|---------------------|-----------------------------|--------|-------------------|-------|
| <i>Age</i>                                                                     |                     |                             |        |                   |       |
|                                                                                | Mean                | 61                          | (4.8)  | 62                | (4.9) |
| <i>Number previous PSA tests</i>                                               |                     |                             |        |                   |       |
|                                                                                | Mean                | 3.9                         | (3.6)  | 2.2*              | (1.8) |
| <i>Routine PSA testing saves lives</i>                                         |                     |                             |        |                   |       |
| Frequency                                                                      | yes                 | 7                           | (58%)  | 9                 | (64%) |
|                                                                                | no                  | 2                           | (17%)  | 2                 | (14%) |
|                                                                                | don't know          | 3                           | (25%)  | 3                 | (21%) |
| <i>Education</i>                                                               |                     |                             |        |                   |       |
| Frequency                                                                      | High school or less | 2                           | (17%)  | 4                 | (28%) |
|                                                                                | some uni or TAFE    | 4                           | (33%)  | 4                 | (28%) |
|                                                                                | uni/TAFE graduate   | 4                           | (33%)  | 1                 | (7%)  |
|                                                                                | uni postgrad        | 2                           | (17%)  | 5                 | (36%) |
| Note. * n=13, (1 missing); TAFE = Technical and Further Education Institutions |                     |                             |        |                   |       |

**Table 2. Where do Men Receive Information about Testing for Prostate Cancer? (N=26)**

|                                              | Agree | (%)  |
|----------------------------------------------|-------|------|
| I don't look for information                 | 3     | (12) |
| Family and friends                           | 11    | (42) |
| Internet                                     | 10    | (38) |
| Media                                        | 9     | (35) |
| General practitioner                         | 17    | (65) |
| Urologist/specialist/hospital                | 5     | (20) |
| Note: men could endorse more than one source |       |      |

**Table 3. Linear Regression Analysis Predicting Future Intention-to-Screen for Prostate Cancer**

|                                          | <i>Coefficient</i> | <i>SE B</i> | CI<br>Lower | CI<br>Upper | <i>p</i> |
|------------------------------------------|--------------------|-------------|-------------|-------------|----------|
| Constant                                 | -0.16              | 1.69        | -3.66       | 3.35        | 0.93     |
| Pre-assessment intention-to-screen score | 0.74               | 0.18        | 0.36        | 1.11        | 0.001    |
| Number of previous PSA tests             | 0.63               | 0.22        | 0.18        | 1.07        | 0.008    |
| Group (Community Jury/Control)           | -3.69              | 1.19        | -6.16       | -1.21       | 0.005    |

Note. N=25; CI= confidence interval;  
These data are slightly different to Rychetnik et al (2014) analyses as they are based on intention-to-treat.

**Table 4. Changes in Men's Knowledge Scores from Pre-to Post-assessment**

|                                          |                | Wrong to Right |      | Right to Right |      | Right to Wrong |     | Wrong to Wrong |      | <i>p</i> |
|------------------------------------------|----------------|----------------|------|----------------|------|----------------|-----|----------------|------|----------|
|                                          |                | n              | (%)  | n              | (%)  | n              | (%) | n              | (%)  |          |
| Recommended by guidelines?               | community jury | 4              | (42) | 3              | (25) | 1              | (8) | 3              | (25) | 0.08     |
|                                          | control*       | 1              | (8)  | 1              | (8)  | 1              | (8) | 10             | (77) |          |
| how accurate is the PSA test?            | community jury | 6              | (50) | 4              | (33) | 1              | (8) | 1              | (8)  | 0.03     |
|                                          | control        | 2              | (14) | 9              | (64) | 0              | (0) | 3              | (21) |          |
| list possible treatment options          | community jury | 2              | (17) | 7              | (58) | 0              | (0) | 2              | (17) | 0.6      |
|                                          | control        | 3              | (21) | 7              | (50) | 0              | (0) | 4              | (27) |          |
| list possible side effects of treatments | community jury | 3              | (25) | 7              | (58) | 0              | (0) | 2              | (17) | 0.6      |
|                                          | control        | 3              | (21) | 7              | (50) | 0              | (0) | 4              | (27) |          |

Note: \*n=13 (1 missing)

**Table 5. Changes in Men's Knowledge Scores Post- to Follow-up Assessment**

|                               |                | Wrong to Right |      | Right to Right |      | Right to Wrong |      | Wrong to Wrong |      | <i>p</i> |
|-------------------------------|----------------|----------------|------|----------------|------|----------------|------|----------------|------|----------|
|                               |                | n              | (%)  | n              | (%)  | n              | (%)  | n              | (%)  |          |
| Recommended by guidelines?    | community jury | 0              | (0)  | 7              | (58) | 1              | (8)  | 4              | (33) | 0.7      |
|                               | control*       | 0              | (0)  | 1              | (7)  | 1              | (7)  | 11             | (85) |          |
| how accurate is the PSA test? | community jury | 0              | (0)  | 10             | (83) | 0              | (0)  | 2              | (17) | 0.1      |
|                               | control        | 2              | (14) | 9              | (64) | 2              | (14) | 1              | (7)  |          |

Note: \*n=13 (1 missing)

1  
2  
3  
4  
5  
6  
7  
8  
9  
10  
11  
12  
13  
14  
15  
16  
17  
18  
19  
20  
21  
22  
23  
24  
25  
26  
27  
28  
29  
30  
31  
32  
33  
34  
35  
36  
37  
38  
39  
40  
41  
42  
43  
44  
45  
46  
47  
48  
49  
50  
51  
52  
53  
54  
55  
56  
57  
58  
59  
60

Figure 1. Consort Flow-Chart of Participants

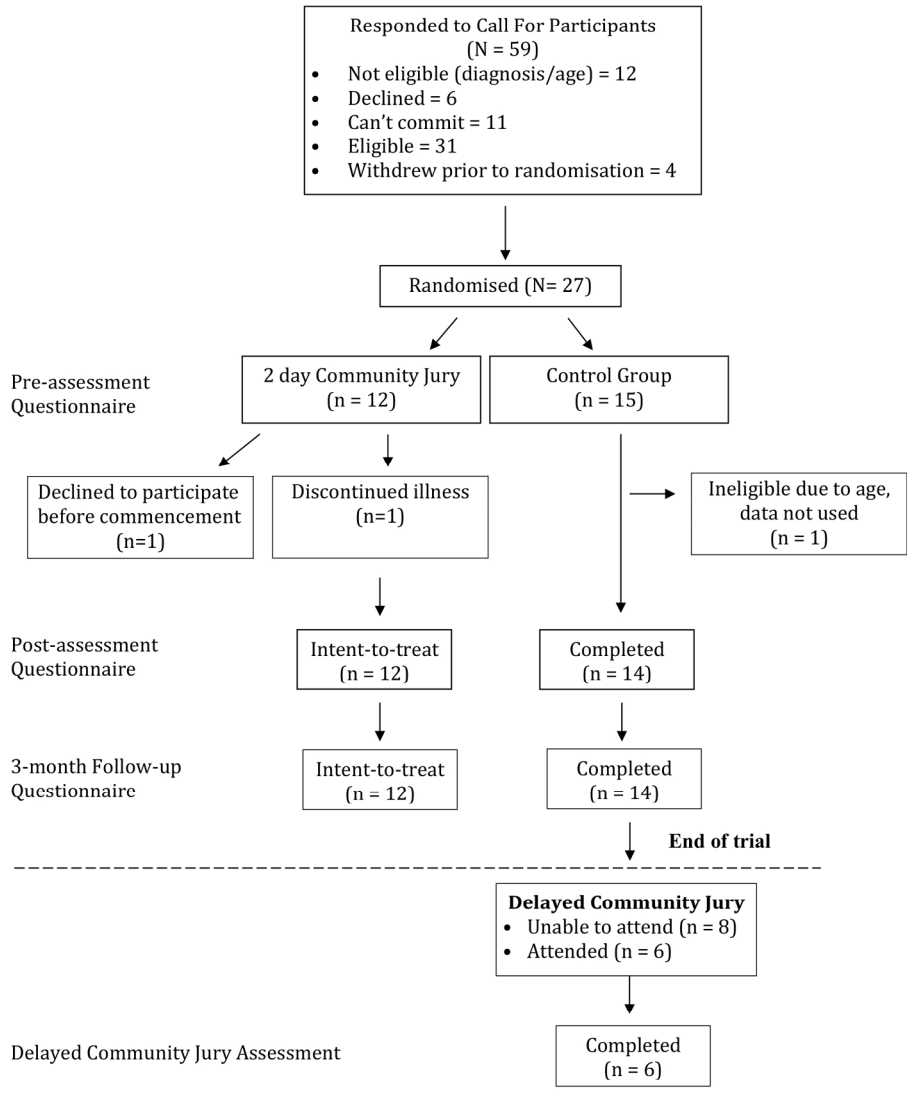

Figure 2. Future Intention-to-Screen Scores at Pre, Post, and Three Month Follow-up



Note: CJ=Community Jury group; M = mean score; p values based on ANCOVA analyses pre to post and pre to 3 month follow-up.

view only



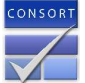

# CONSORT 2010 checklist of information to include when reporting a randomised trial\*

| Section/Topic                    | Item No | Checklist item                                                                                                                                                                              | Reported on page No |
|----------------------------------|---------|---------------------------------------------------------------------------------------------------------------------------------------------------------------------------------------------|---------------------|
| <b>Title and abstract</b>        |         |                                                                                                                                                                                             |                     |
|                                  | 1a      | Identification as a randomised trial in the title                                                                                                                                           | 1                   |
|                                  | 1b      | Structured summary of trial design, methods, results, and conclusions (for specific guidance see CONSORT for abstracts)                                                                     | 1-2                 |
| <b>Introduction</b>              |         |                                                                                                                                                                                             |                     |
| Background and objectives        | 2a      | Scientific background and explanation of rationale                                                                                                                                          | 4-5                 |
|                                  | 2b      | Specific objectives or hypotheses                                                                                                                                                           | 5                   |
| <b>Methods</b>                   |         |                                                                                                                                                                                             |                     |
| Trial design                     | 3a      | Description of trial design (such as parallel, factorial) including allocation ratio                                                                                                        | 5-6                 |
|                                  | 3b      | Important changes to methods after trial commencement (such as eligibility criteria), with reasons                                                                                          | NA                  |
| Participants                     | 4a      | Eligibility criteria for participants                                                                                                                                                       | 5-6                 |
|                                  | 4b      | Settings and locations where the data were collected                                                                                                                                        | 5                   |
| Interventions                    | 5       | The interventions for each group with sufficient details to allow replication, including how and when they were actually administered                                                       | 6-8                 |
| Outcomes                         | 6a      | Completely defined pre-specified primary and secondary outcome measures, including how and when they were assessed                                                                          | 8-9                 |
|                                  | 6b      | Any changes to trial outcomes after the trial commenced, with reasons                                                                                                                       | NA                  |
| Sample size                      | 7a      | How sample size was determined                                                                                                                                                              | 5                   |
|                                  | 7b      | When applicable, explanation of any interim analyses and stopping guidelines                                                                                                                | NA                  |
| <b>Randomisation:</b>            |         |                                                                                                                                                                                             |                     |
| Sequence generation              | 8a      | Method used to generate the random allocation sequence                                                                                                                                      | 6                   |
|                                  | 8b      | Type of randomisation; details of any restriction (such as blocking and block size)                                                                                                         | 6                   |
| Allocation concealment mechanism | 9       | Mechanism used to implement the random allocation sequence (such as sequentially numbered containers), describing any steps taken to conceal the sequence until interventions were assigned | 6                   |
| Implementation                   | 10      | Who generated the random allocation sequence, who enrolled participants, and who assigned participants to interventions                                                                     | 6                   |
| Blinding                         | 11a     | If done, who was blinded after assignment to interventions (for example, participants, care providers, those                                                                                | NA                  |

|                                                      |     |                                                                                                                                                   |          |
|------------------------------------------------------|-----|---------------------------------------------------------------------------------------------------------------------------------------------------|----------|
|                                                      |     | assessing outcomes) and how                                                                                                                       |          |
|                                                      | 11b | If relevant, description of the similarity of interventions                                                                                       | 6-7      |
| Statistical methods                                  | 12a | Statistical methods used to compare groups for primary and secondary outcomes                                                                     | 8-9      |
|                                                      | 12b | Methods for additional analyses, such as subgroup analyses and adjusted analyses                                                                  | 8-9      |
| <b>Results</b>                                       |     |                                                                                                                                                   |          |
| Participant flow (a diagram is strongly recommended) | 13a | For each group, the numbers of participants who were randomly assigned, received intended treatment, and were analysed for the primary outcome    | Figure 1 |
|                                                      | 13b | For each group, losses and exclusions after randomisation, together with reasons                                                                  | Figure 1 |
| Recruitment                                          | 14a | Dates defining the periods of recruitment and follow-up                                                                                           | 5-7      |
|                                                      | 14b | Why the trial ended or was stopped                                                                                                                | NA       |
| Baseline data                                        | 15  | A table showing baseline demographic and clinical characteristics for each group                                                                  | Table 1  |
| Numbers analysed                                     | 16  | For each group, number of participants (denominator) included in each analysis and whether the analysis was by original assigned groups           | 9        |
| Outcomes and estimation                              | 17a | For each primary and secondary outcome, results for each group, and the estimated effect size and its precision (such as 95% confidence interval) | 9-11     |
|                                                      | 17b | For binary outcomes, presentation of both absolute and relative effect sizes is recommended                                                       | NA       |
| Ancillary analyses                                   | 18  | Results of any other analyses performed, including subgroup analyses and adjusted analyses, distinguishing pre-specified from exploratory         | 10-11    |
| Harms                                                | 19  | All important harms or unintended effects in each group (for specific guidance see CONSORT for harms)                                             | None     |
| <b>Discussion</b>                                    |     |                                                                                                                                                   |          |
| Limitations                                          | 20  | Trial limitations, addressing sources of potential bias, imprecision, and, if relevant, multiplicity of analyses                                  | 11-12    |
| Generalisability                                     | 21  | Generalisability (external validity, applicability) of the trial findings                                                                         | 11-12    |
| Interpretation                                       | 22  | Interpretation consistent with results, balancing benefits and harms, and considering other relevant evidence                                     | 11-13    |
| <b>Other information</b>                             |     |                                                                                                                                                   |          |
| Registration                                         | 23  | Registration number and name of trial registry                                                                                                    | 2        |
| Protocol                                             | 24  | Where the full trial protocol can be accessed, if available                                                                                       | 2        |
| Funding                                              | 25  | Sources of funding and other support (such as supply of drugs), role of funders                                                                   | 13       |

\*We strongly recommend reading this statement in conjunction with the CONSORT 2010 Explanation and Elaboration for important clarifications on all the items. If relevant, we also recommend reading CONSORT extensions for cluster randomised trials, non-inferiority and equivalence trials, non-pharmacological treatments, herbal interventions, and pragmatic trials. Additional extensions are forthcoming: for those and for up to date references relevant to this checklist, see [www.consort-statement.org](http://www.consort-statement.org).
